# Supplementary material for: Experimental and In Silico Evaluation of New Heteroaryl Benzothiazole Derivatives as Antimicrobial Agents
Source: MDPI journal article supplement (doi:10.3390/antibiotics11111654), 2022-11-18

# <sup>1</sup>H-NMR and <sup>13</sup>C-NMR of compounds

## Compound 2a

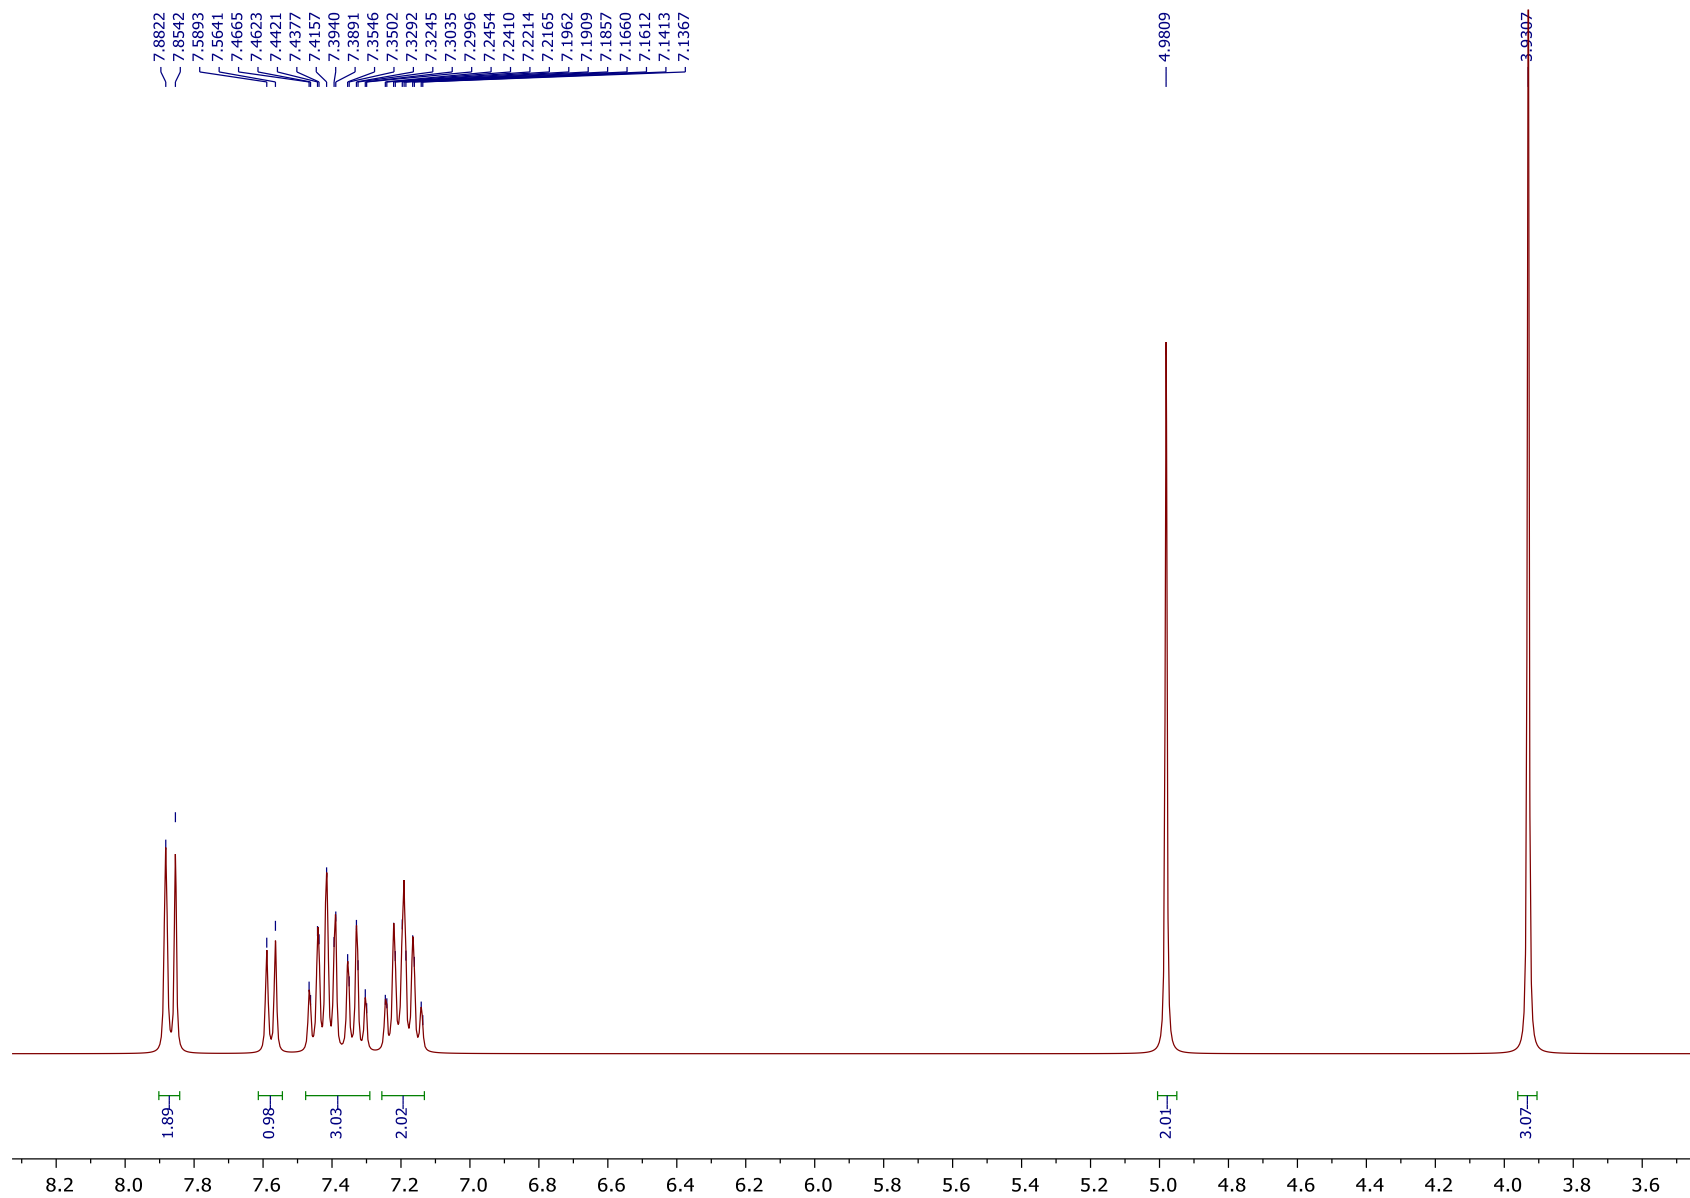

CARBON\_01  
1s-66108-20cop

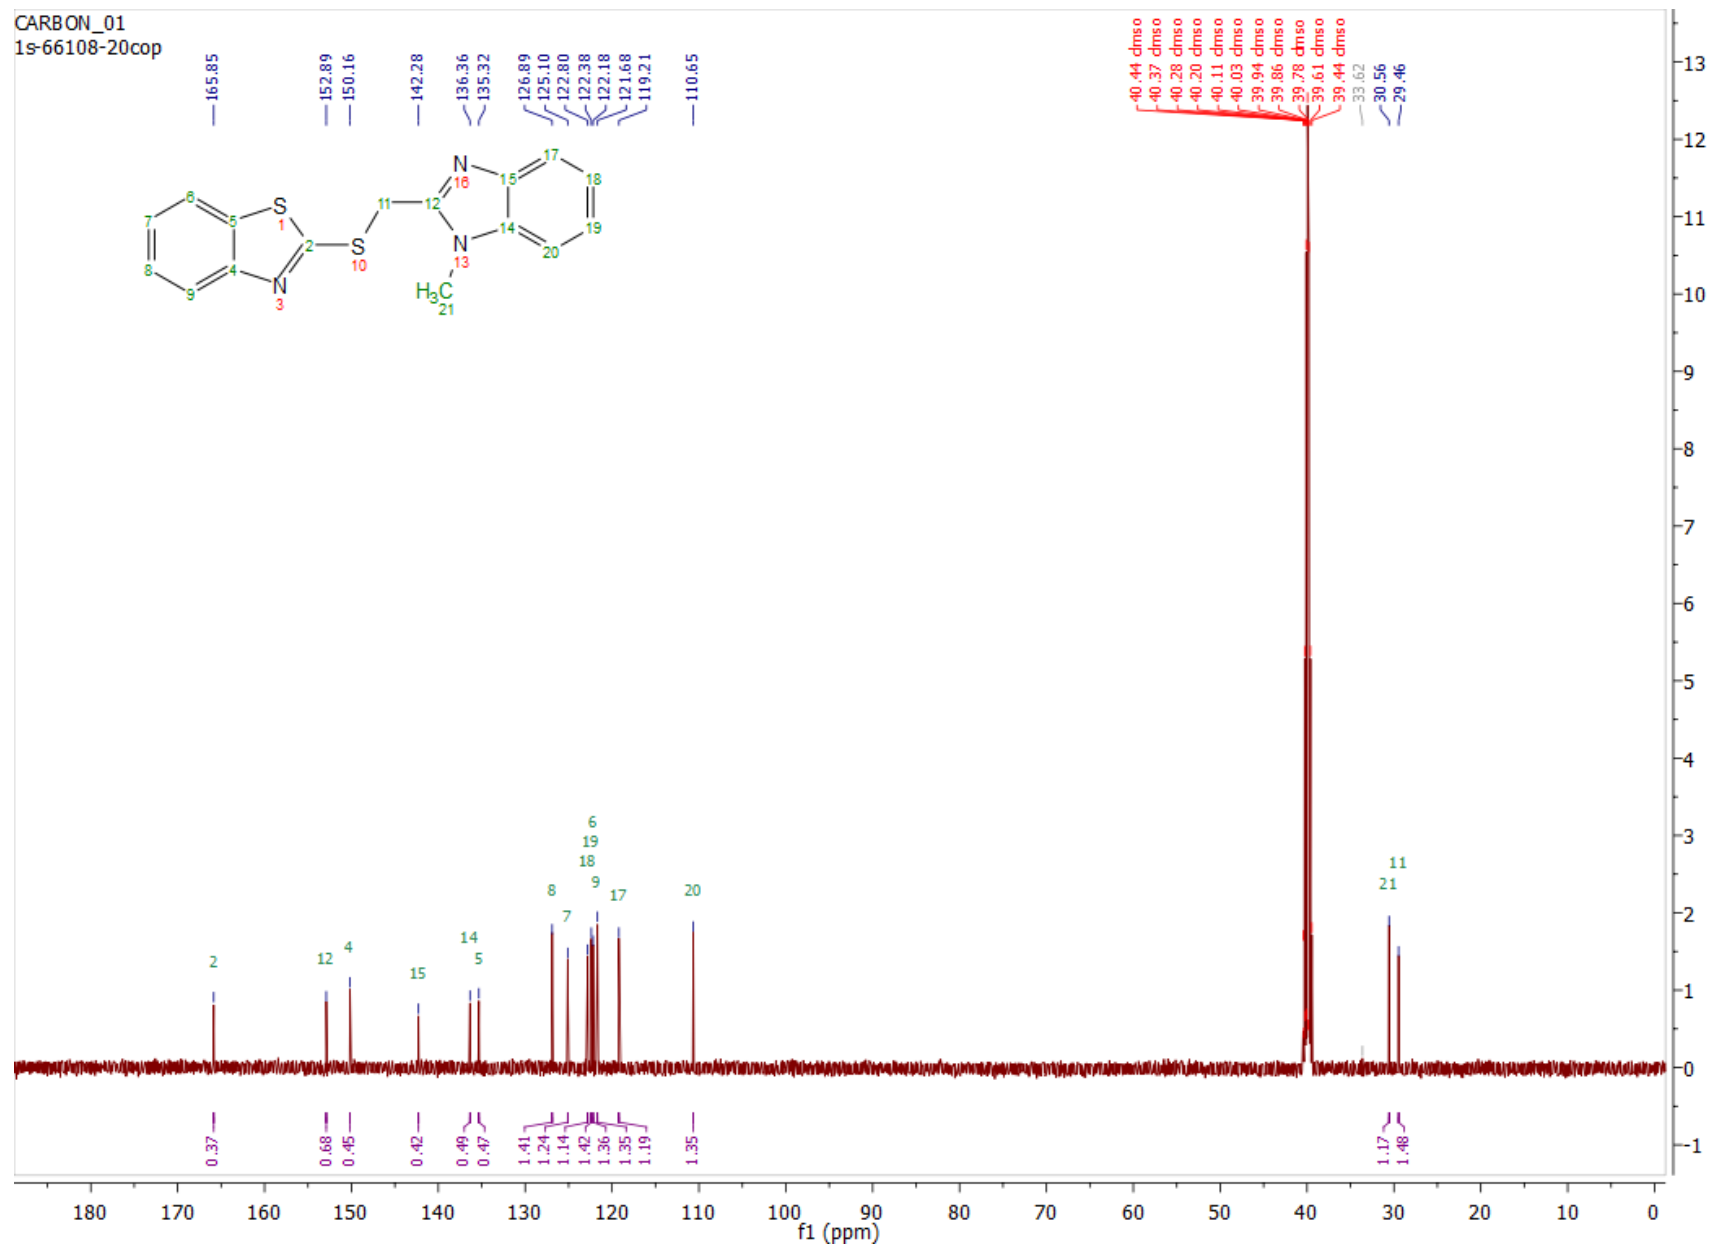

Compound 2b

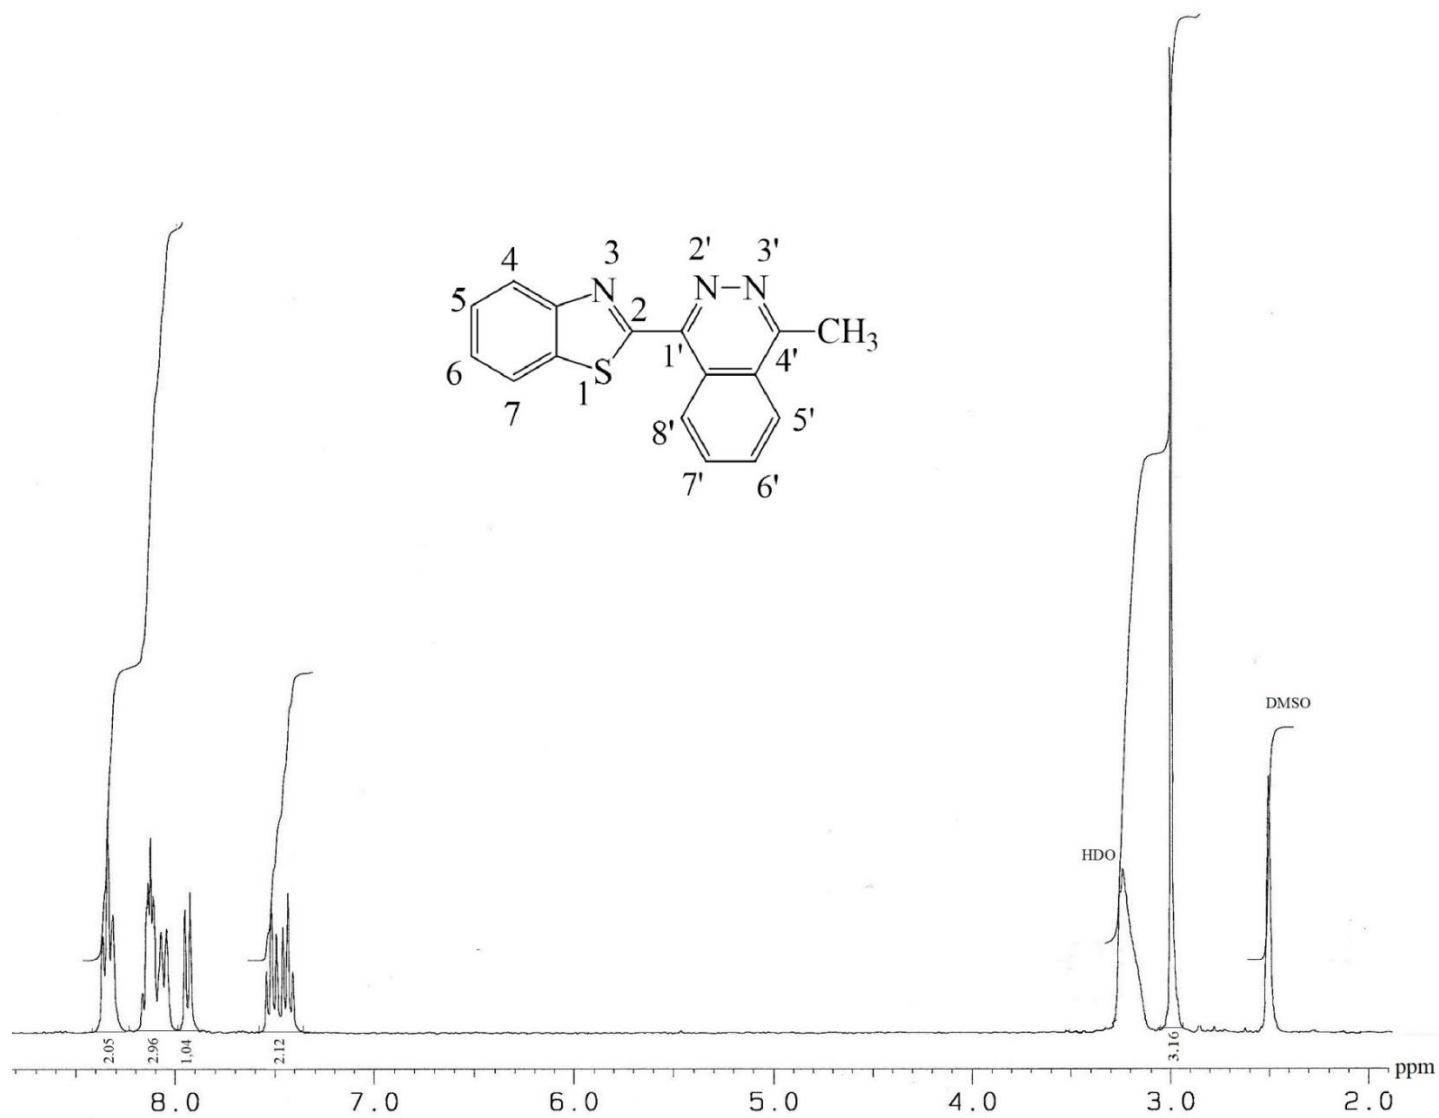

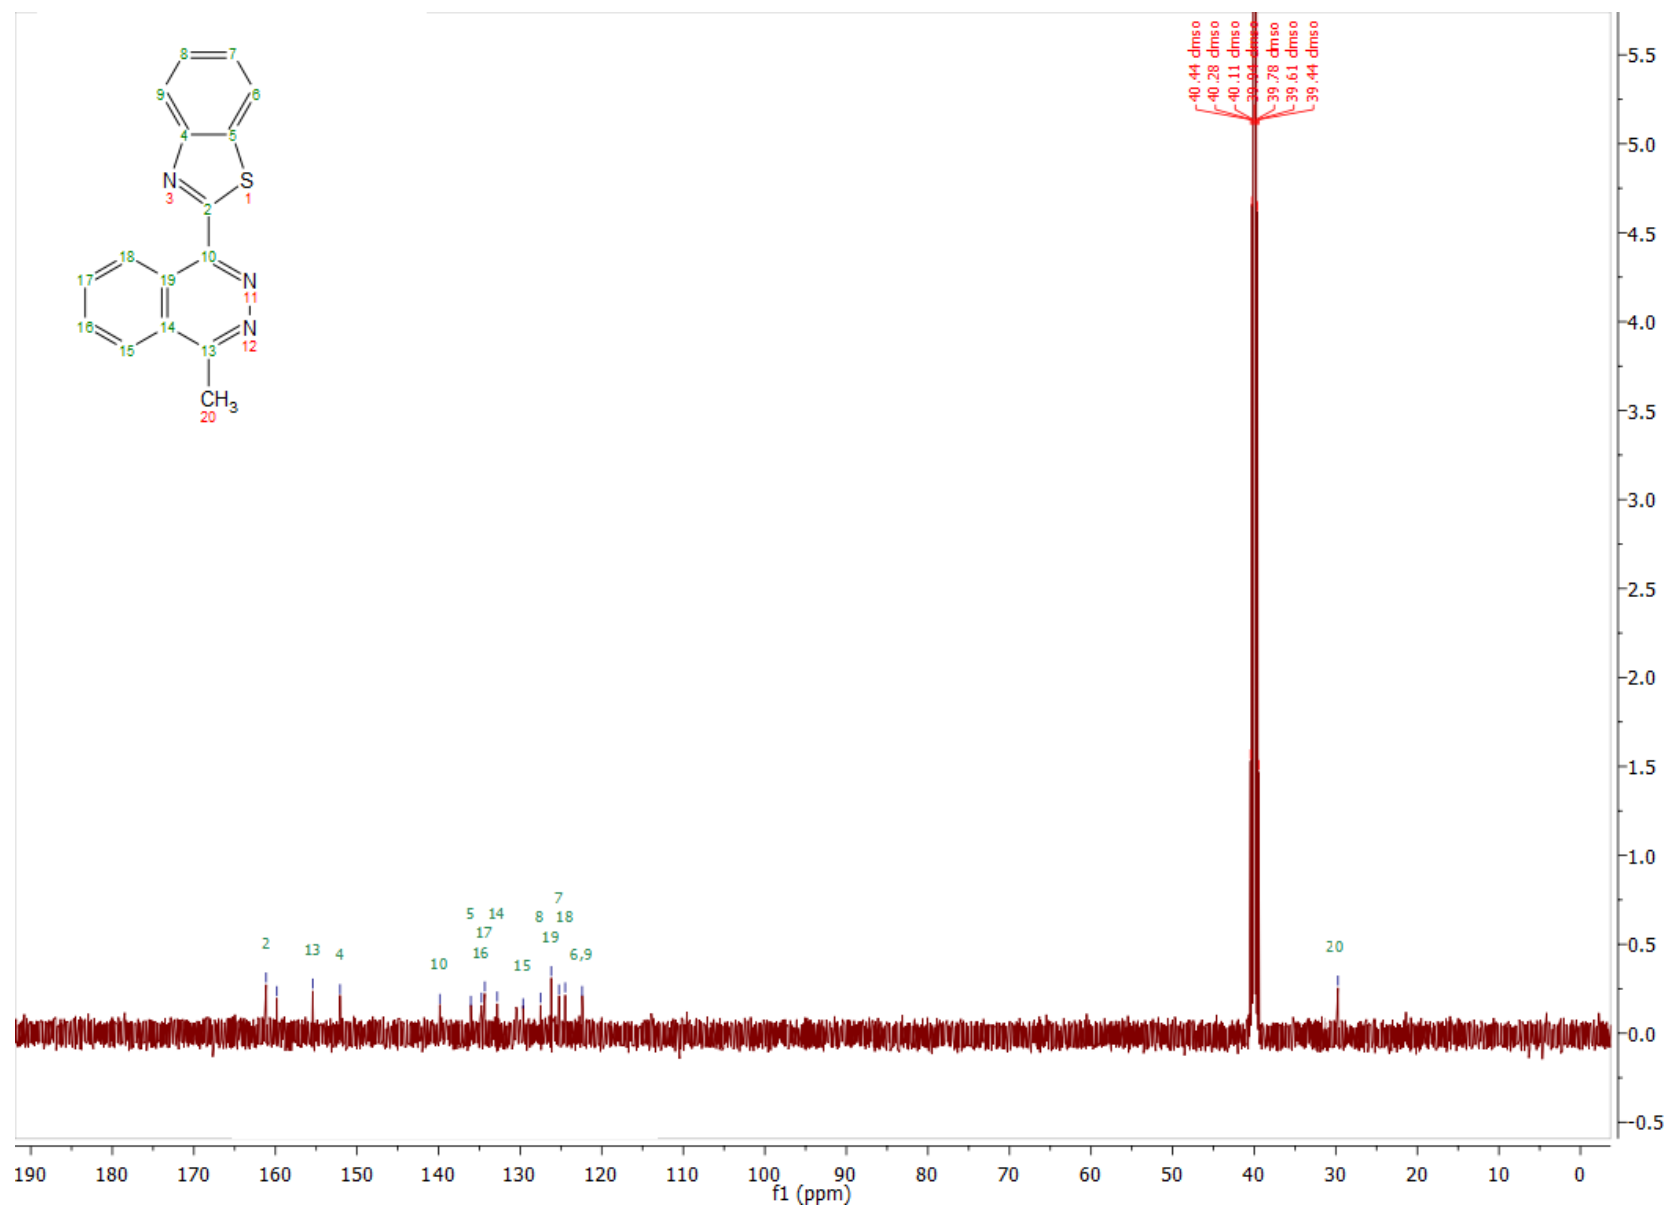

**Compound 2c**

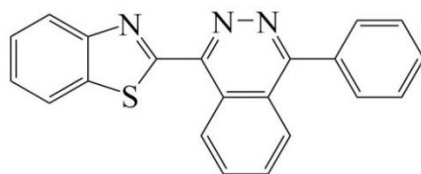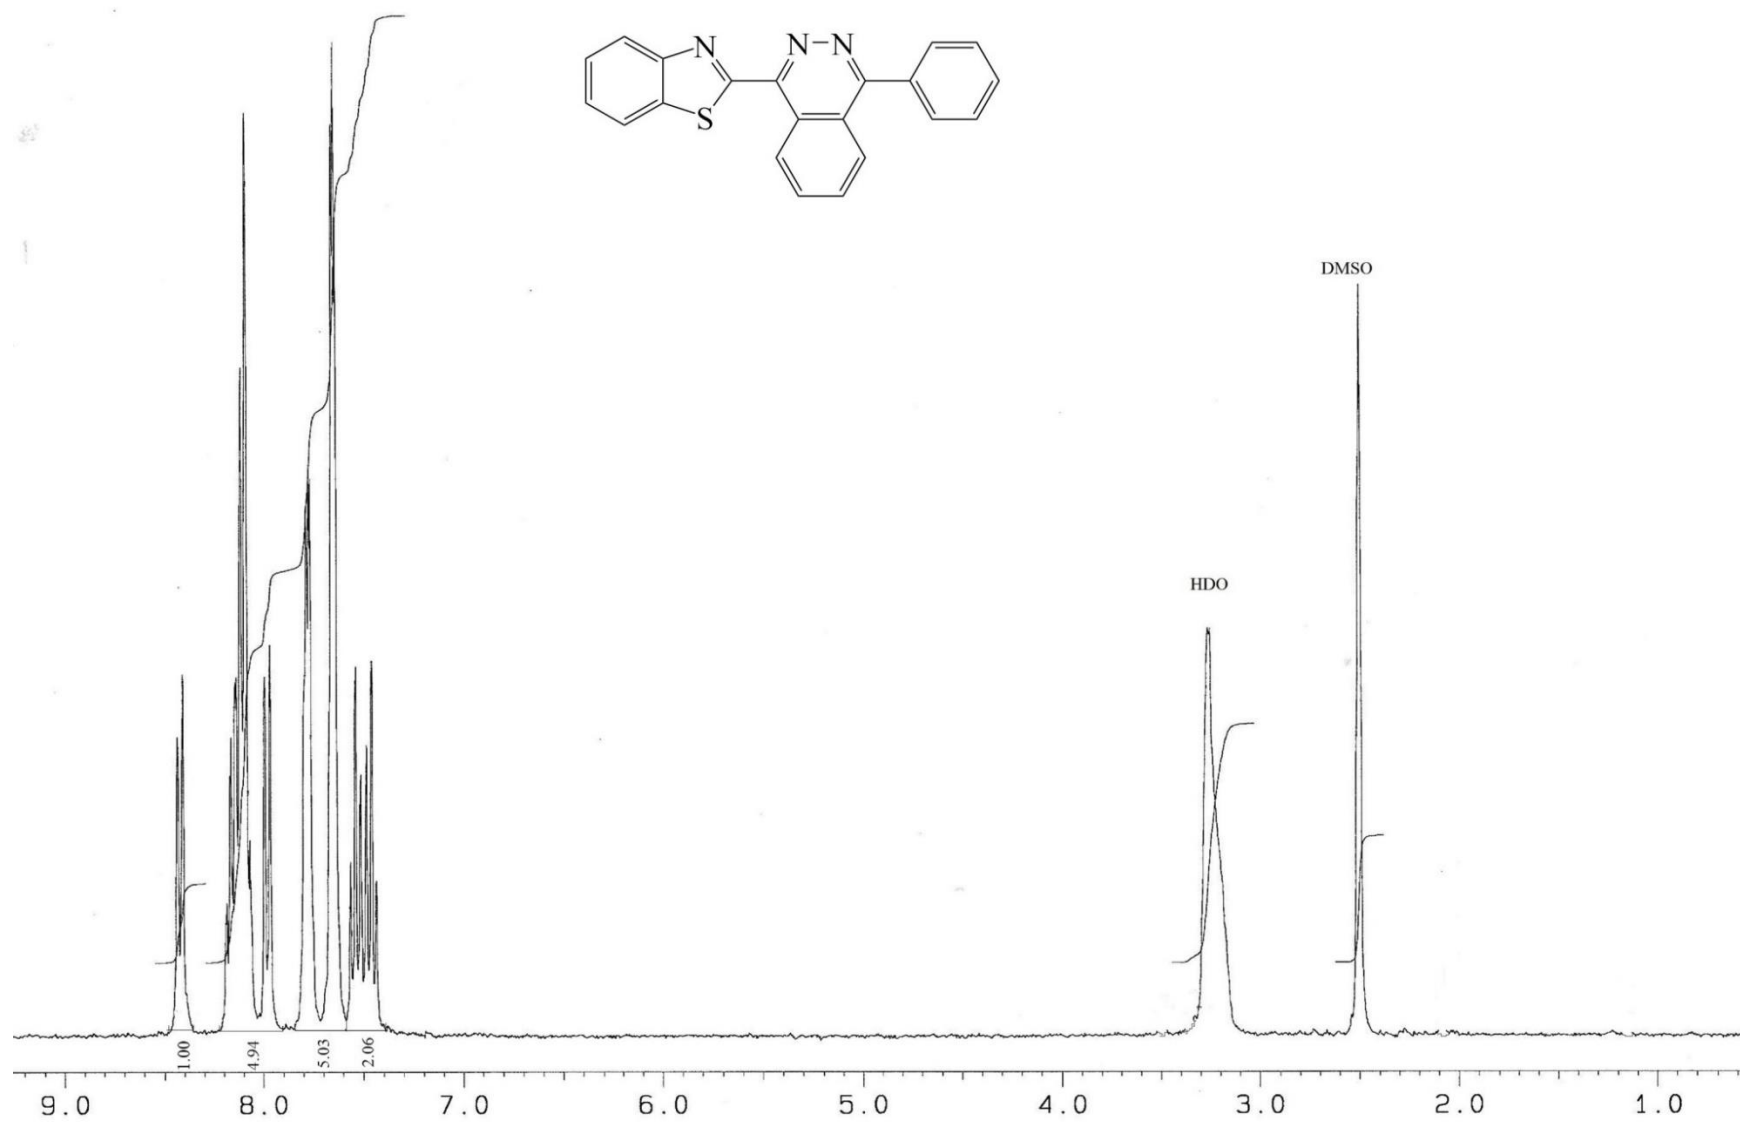

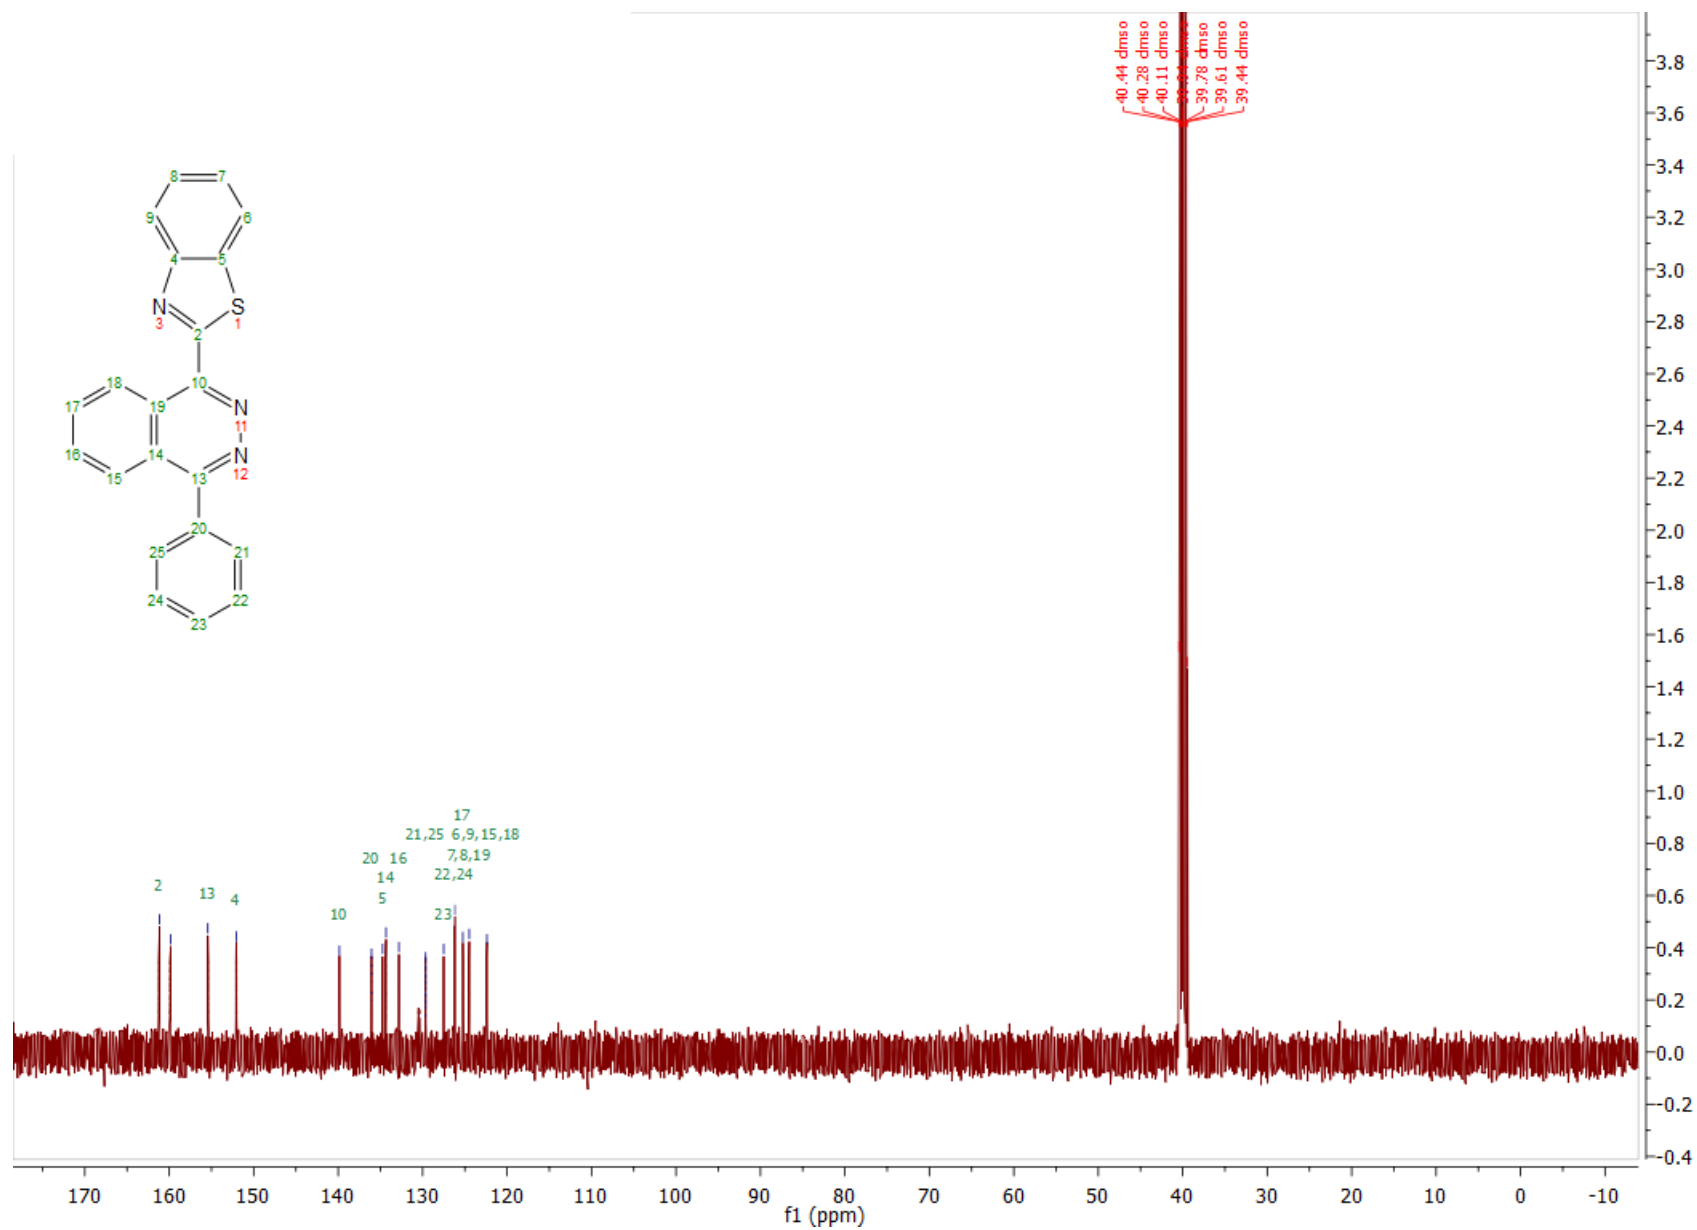

# Compound 2d

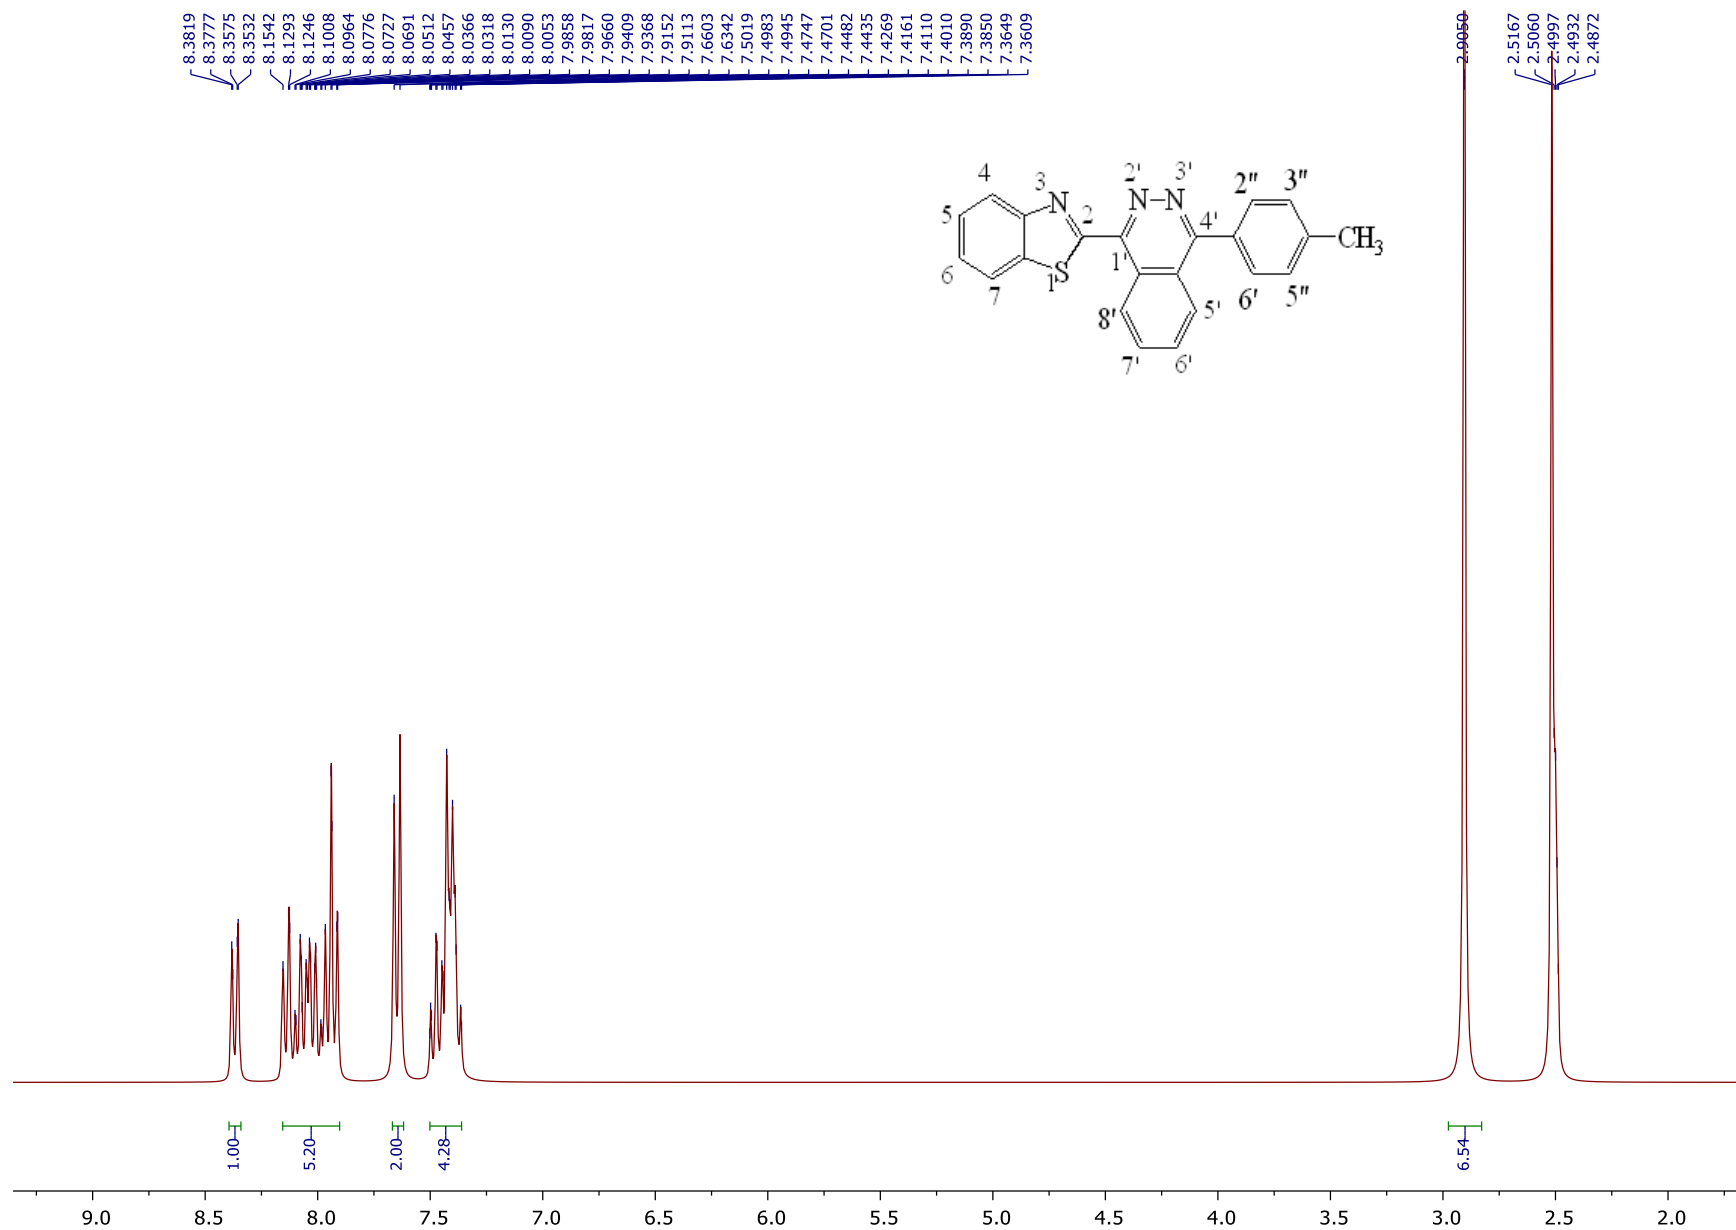

CARBON\_01

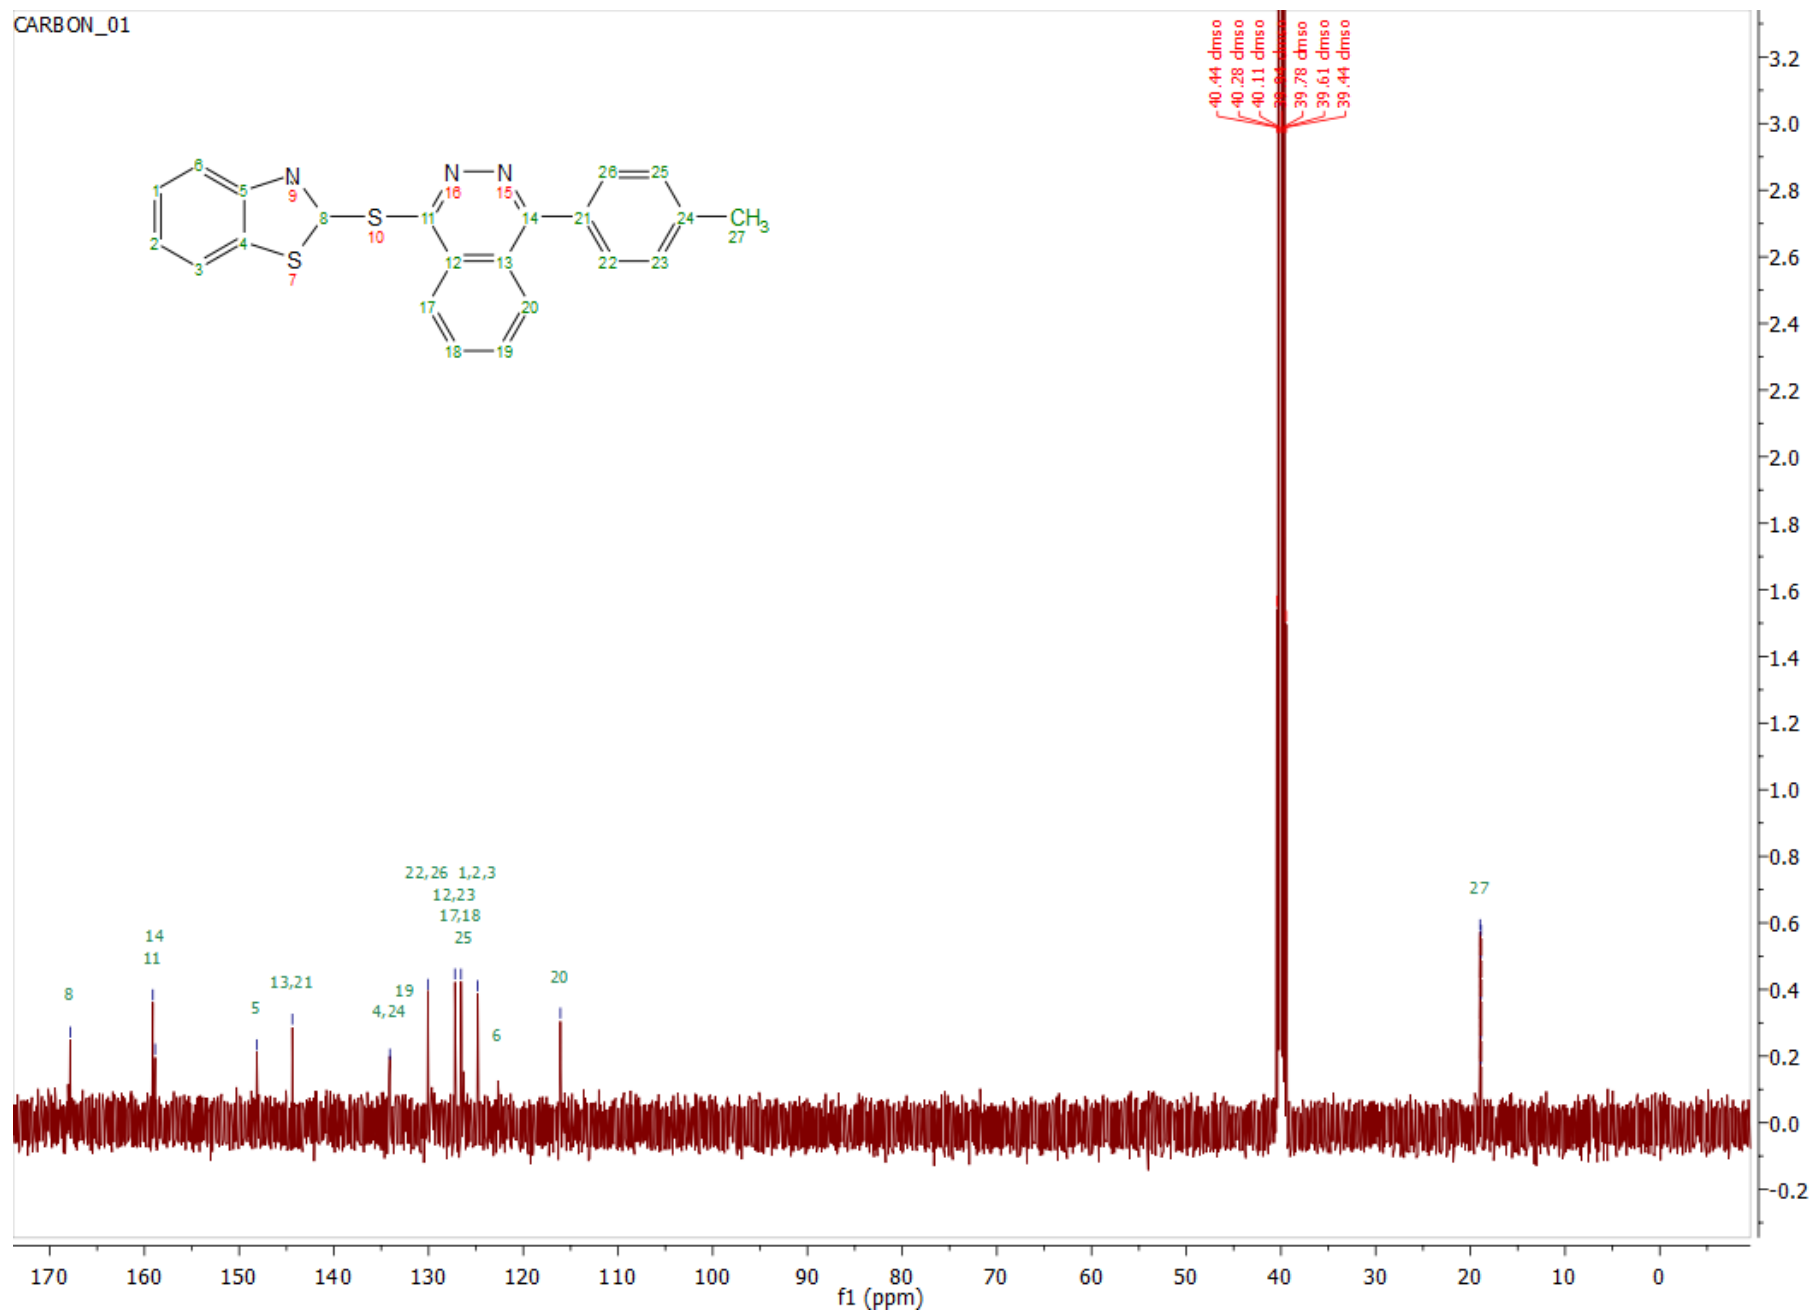



# Compound 2e

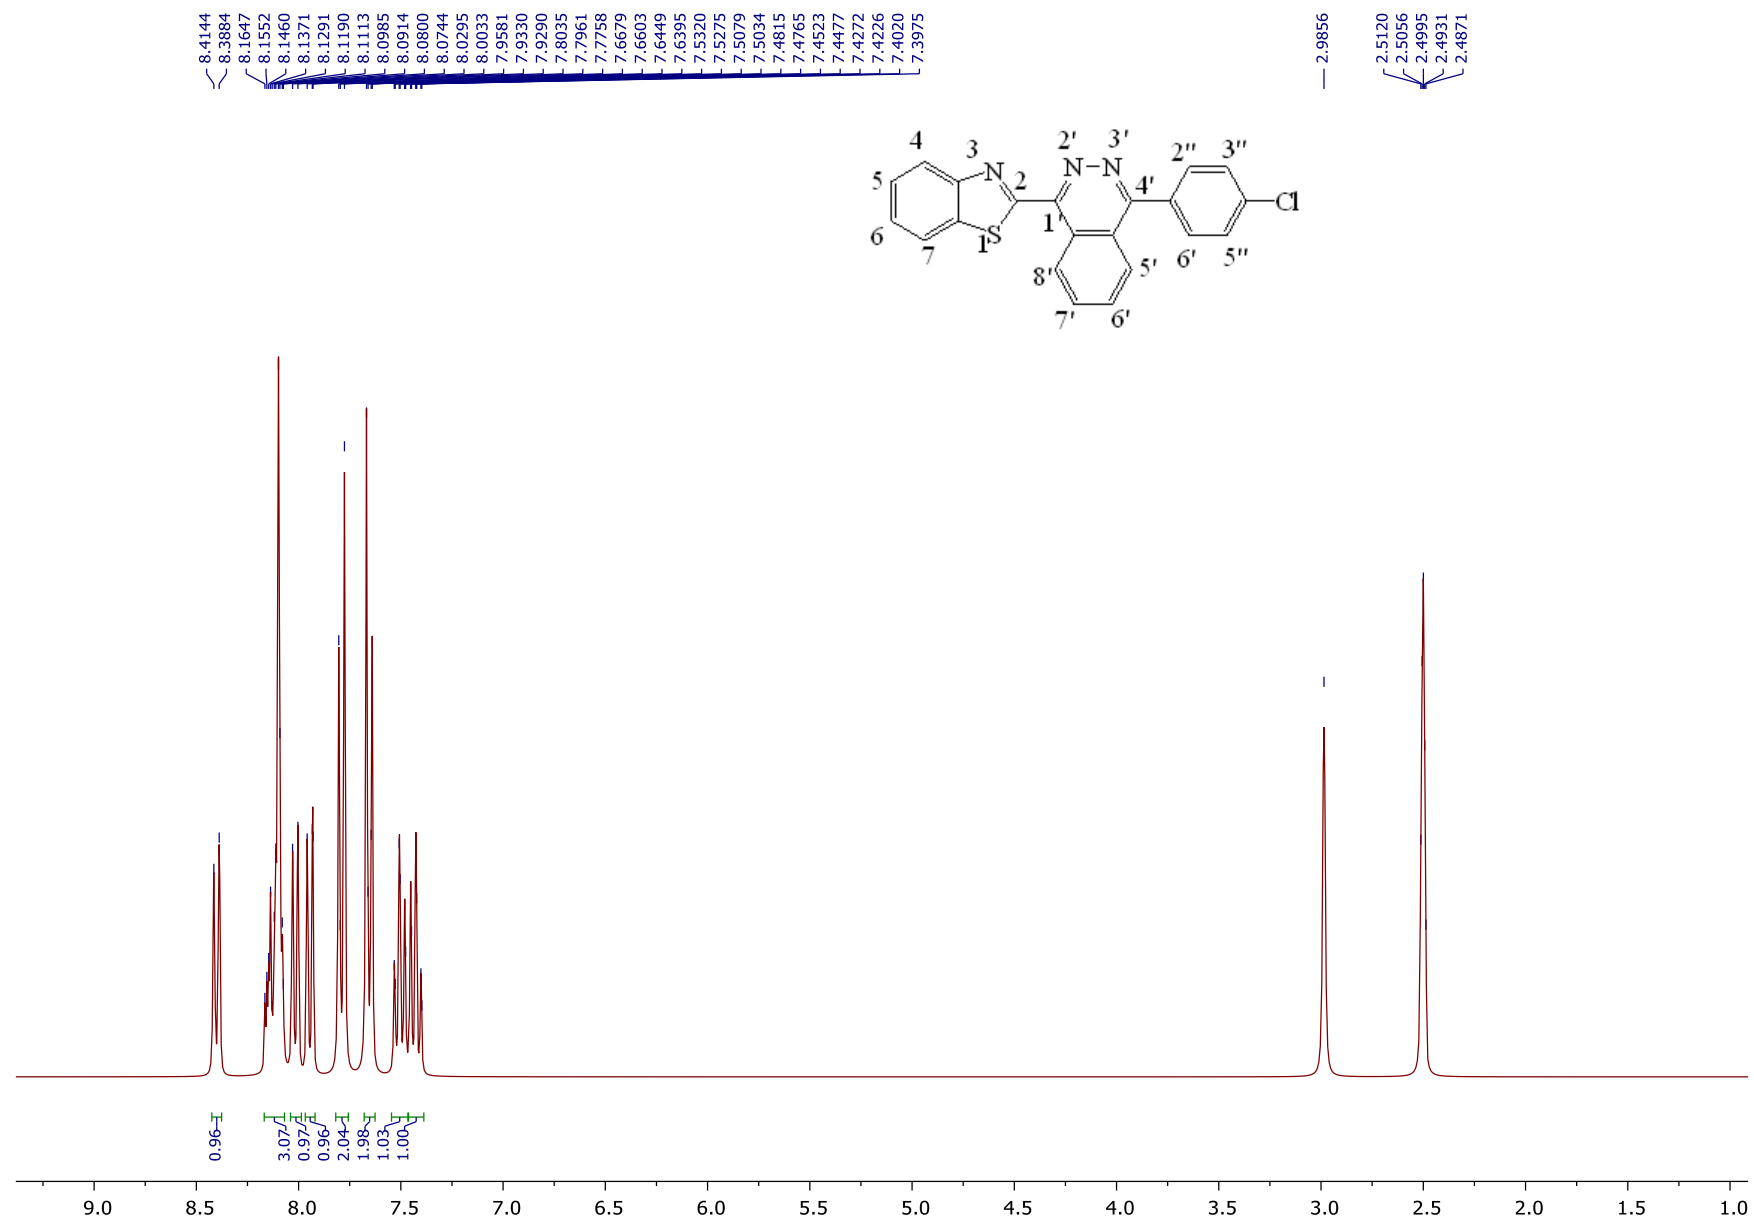

CARBON\_01  
1s-85615-cocop

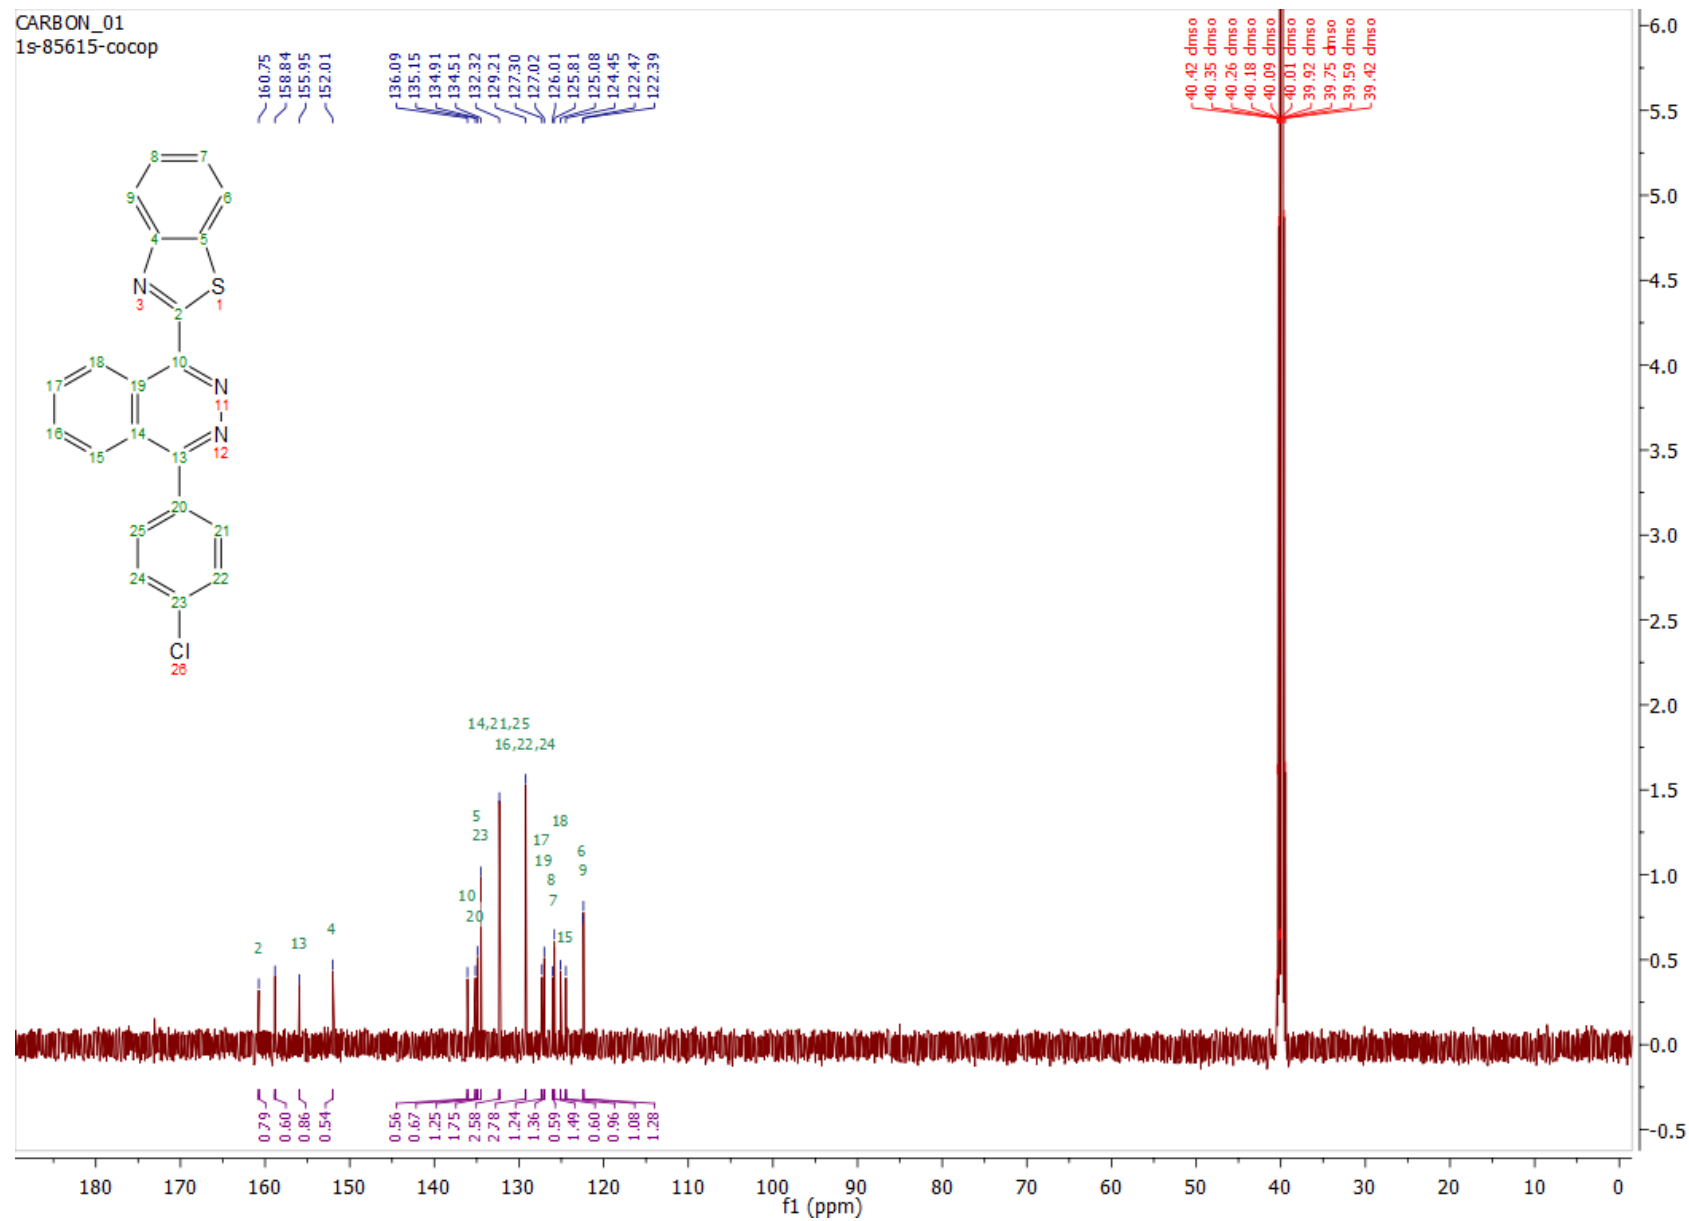

# Compound 2f

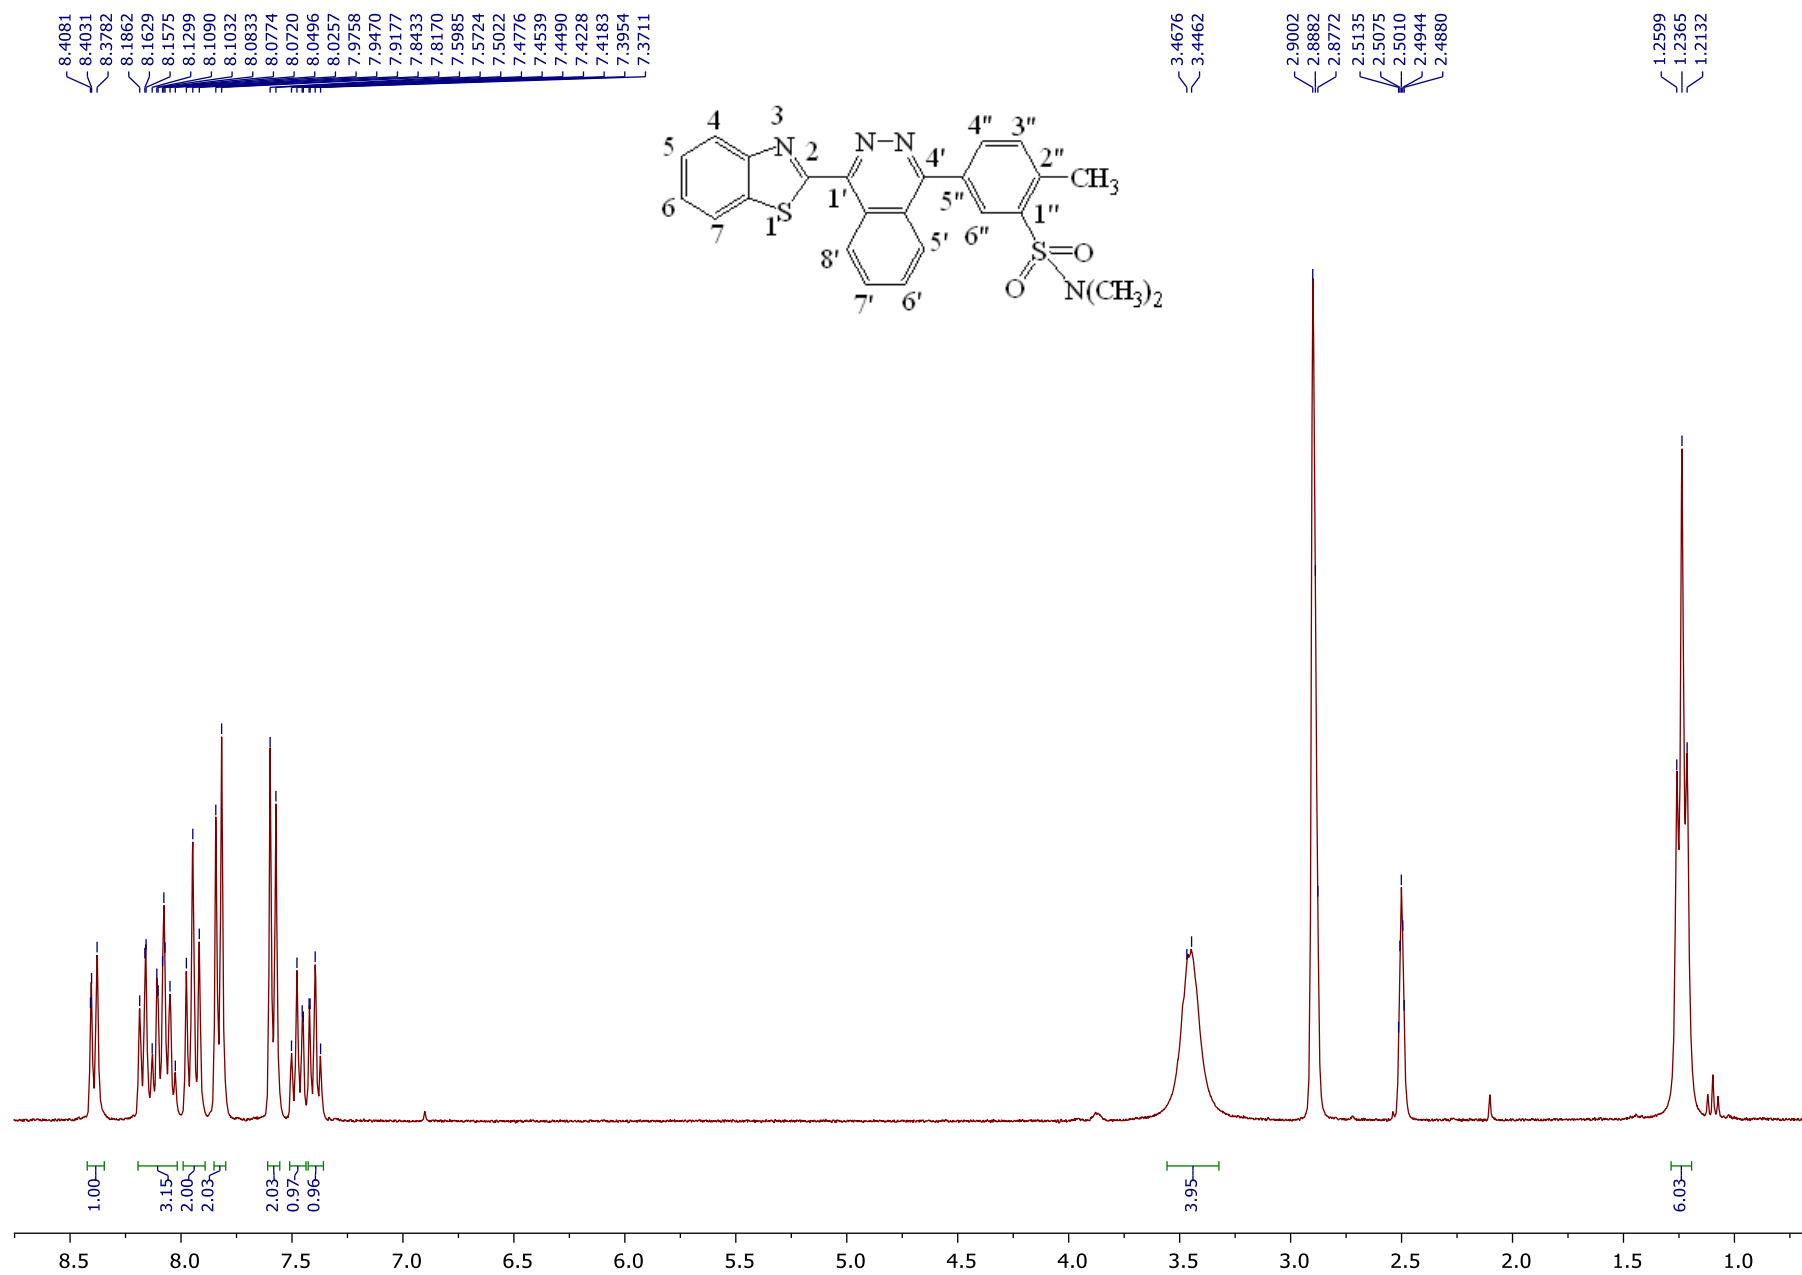

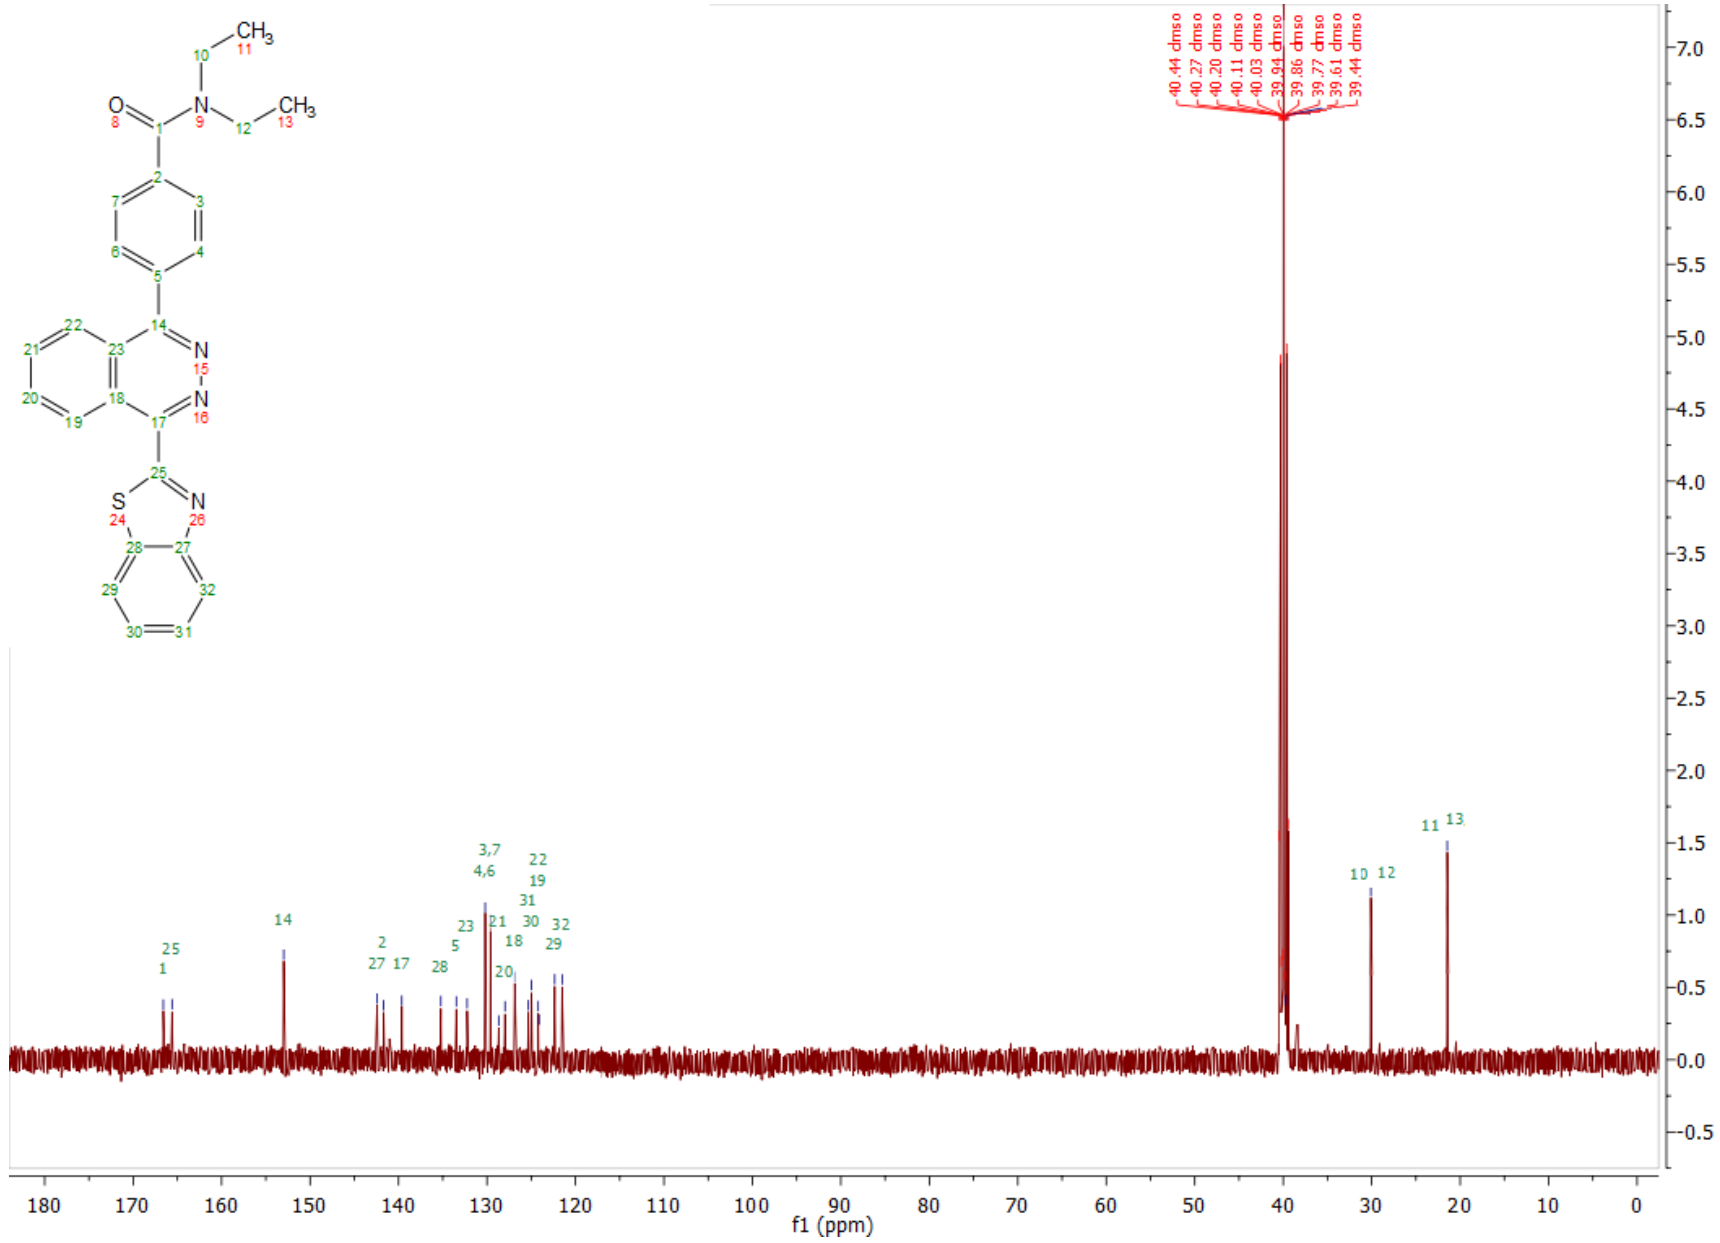

# Compound 2g

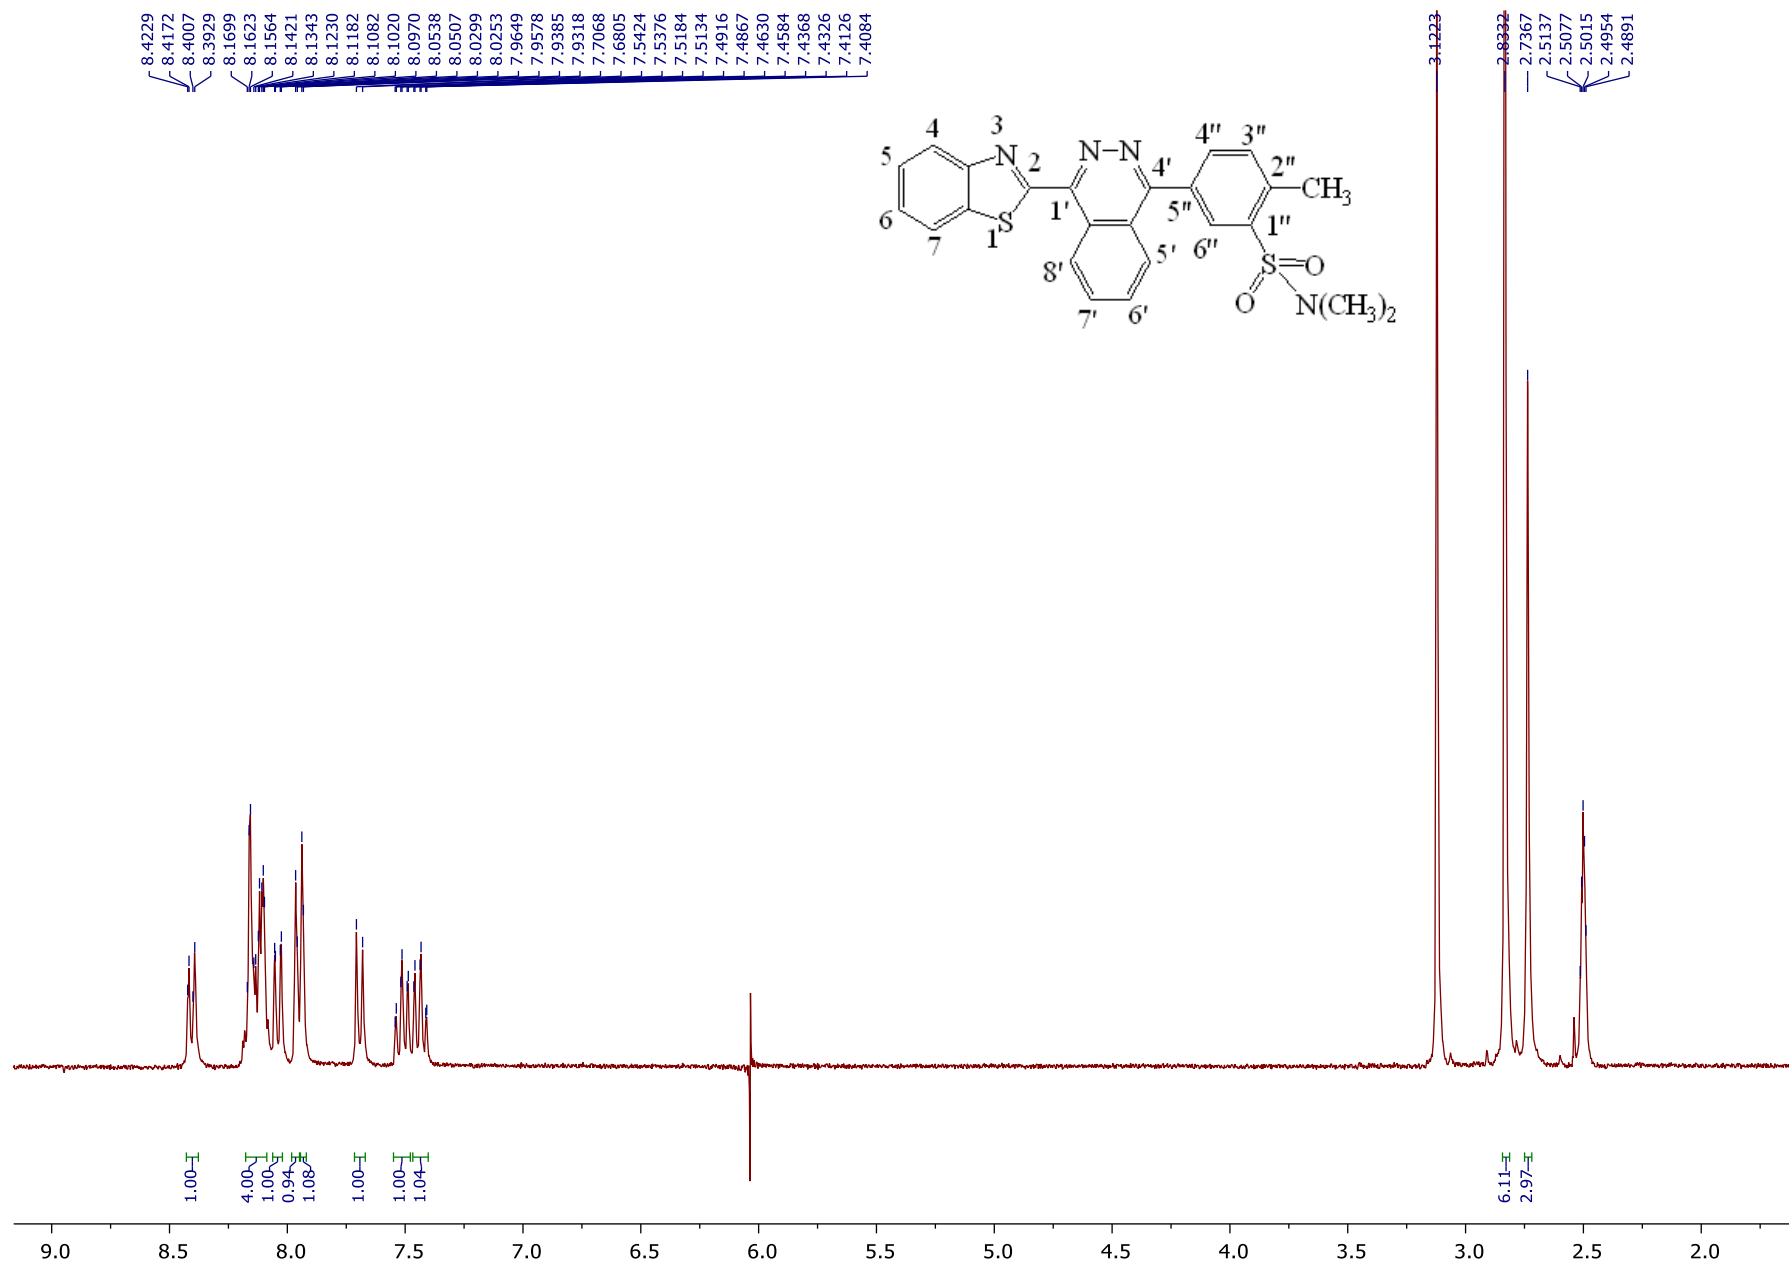

CARBON\_01

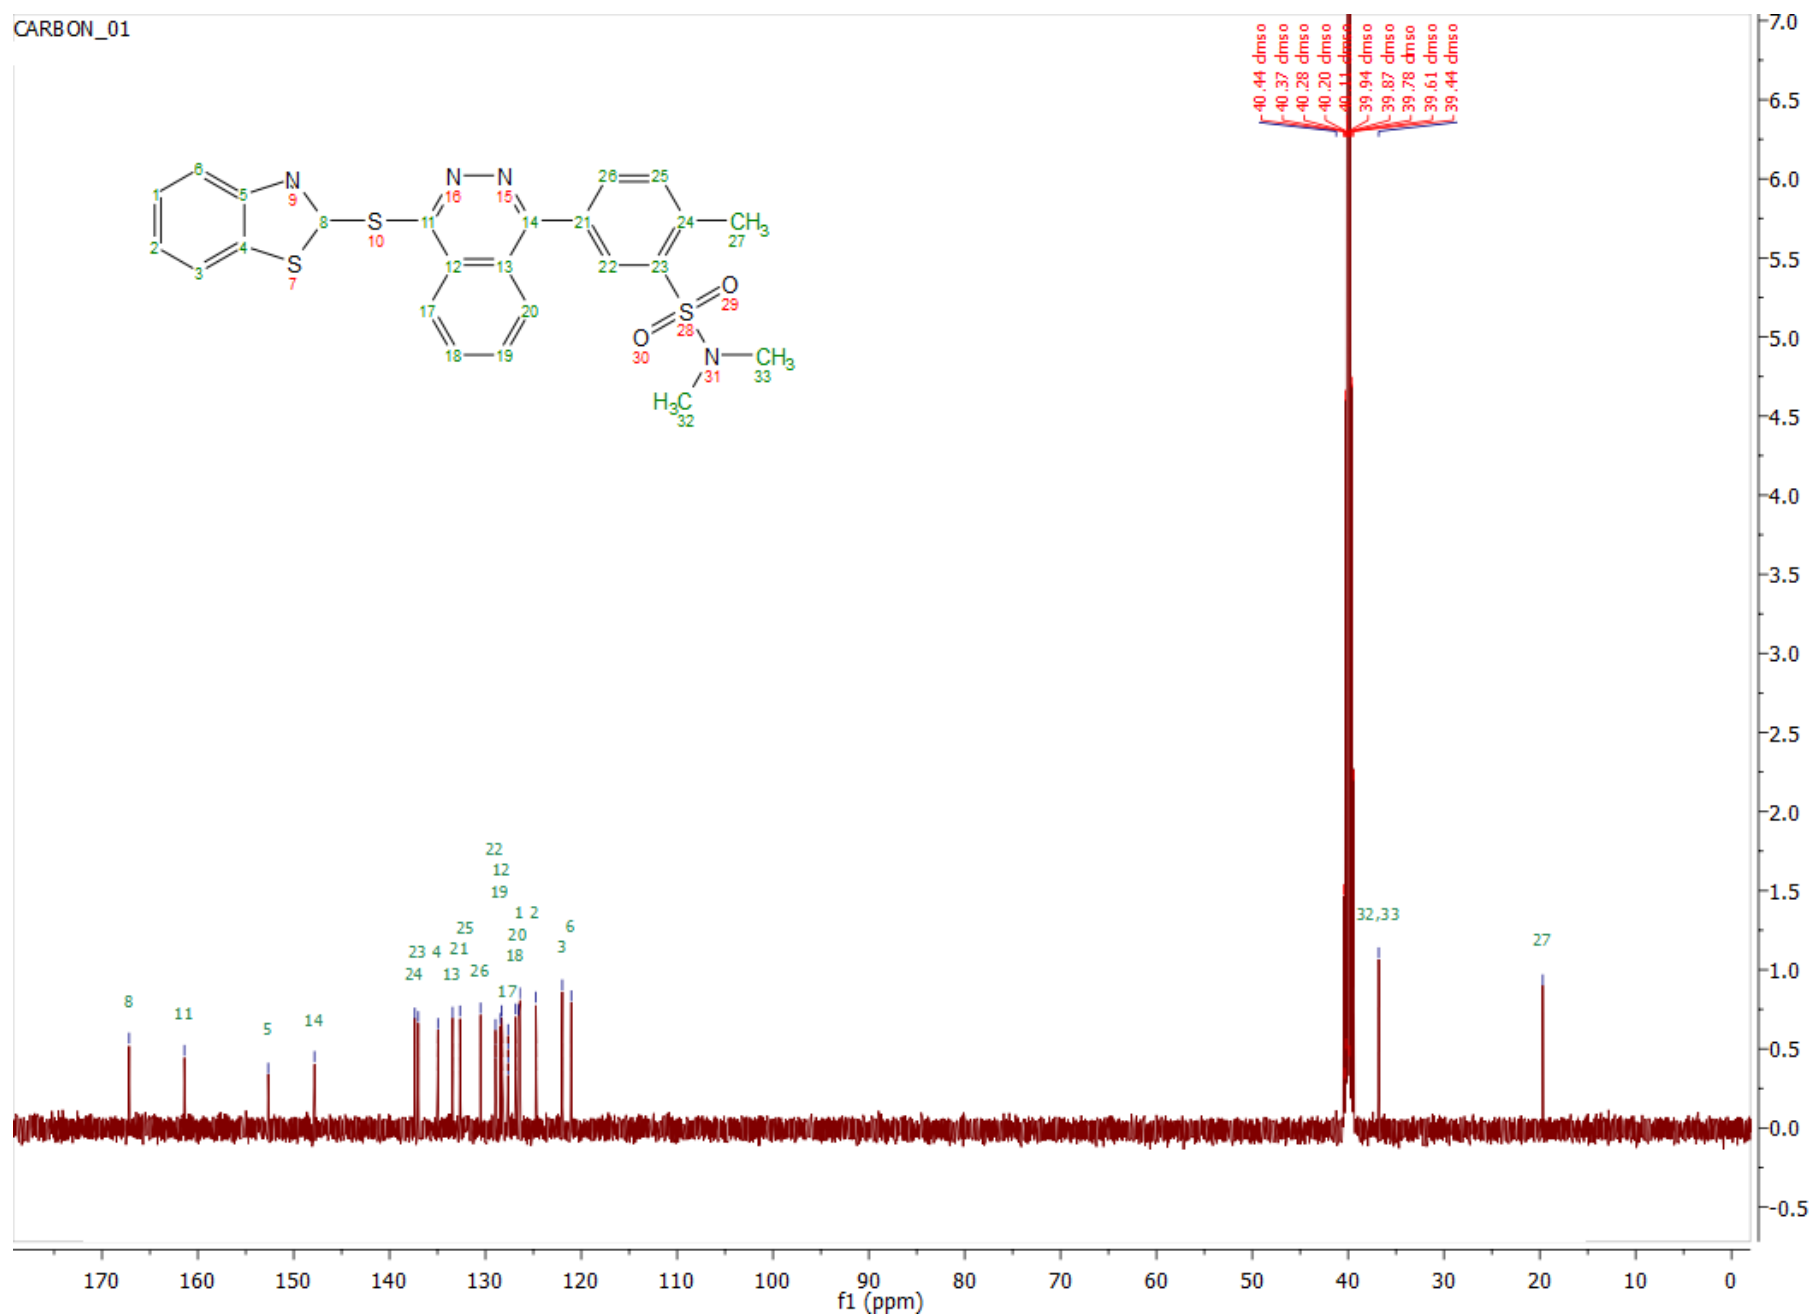

# Compound 2h

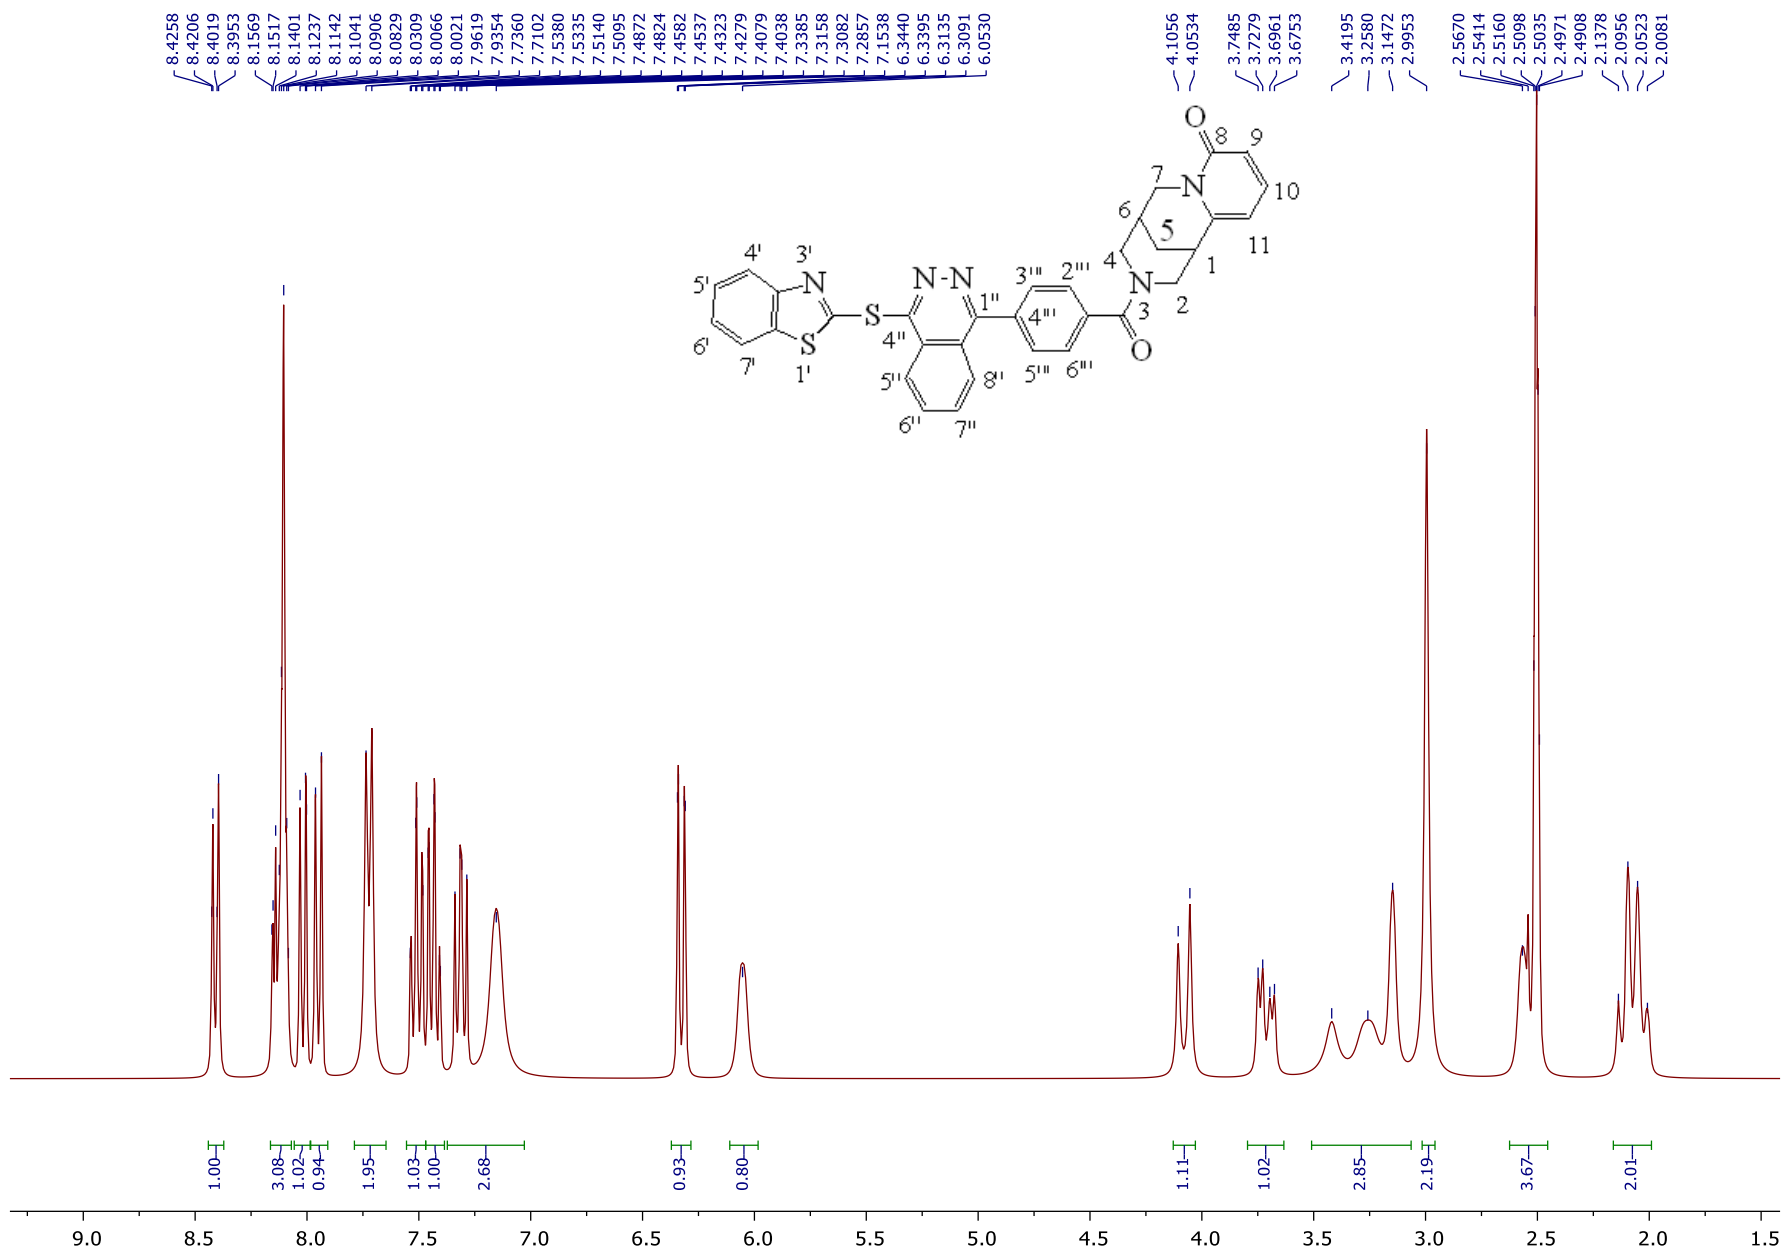

CARBON\_01

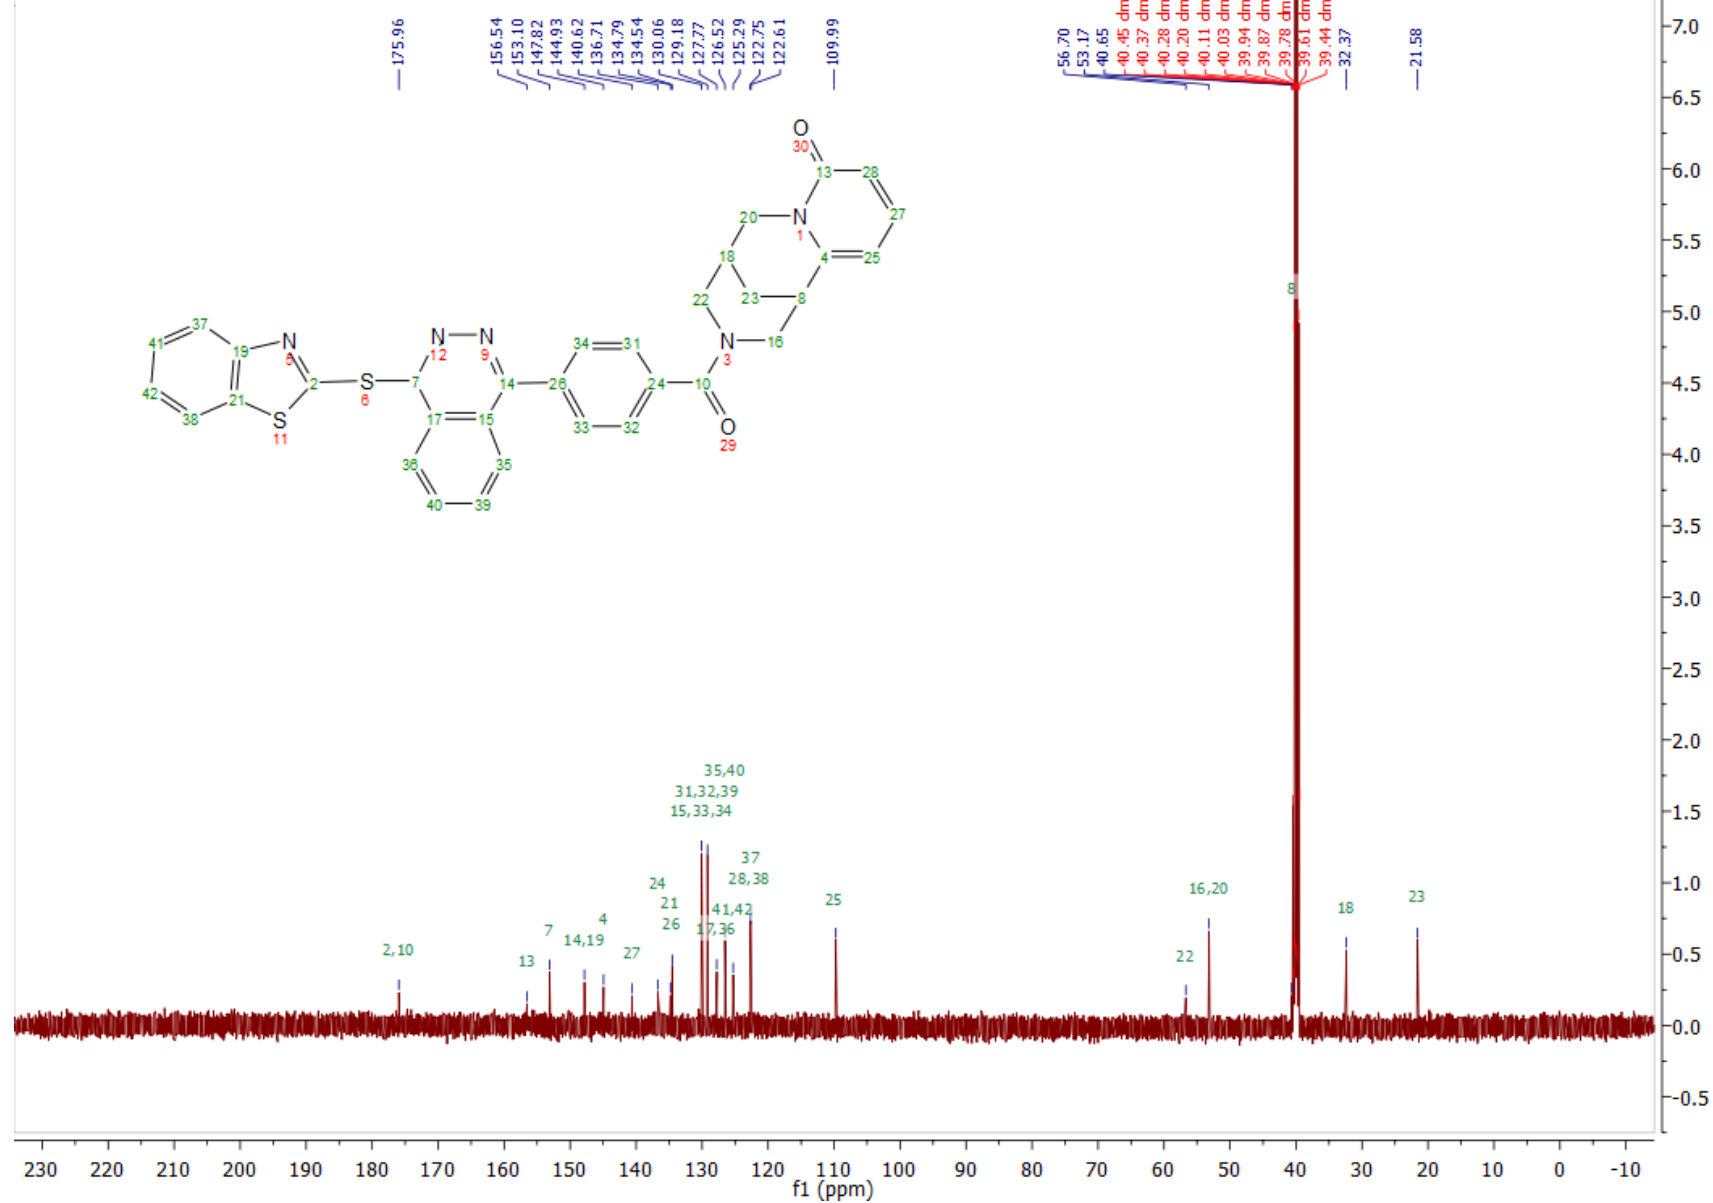



# Compound 2i

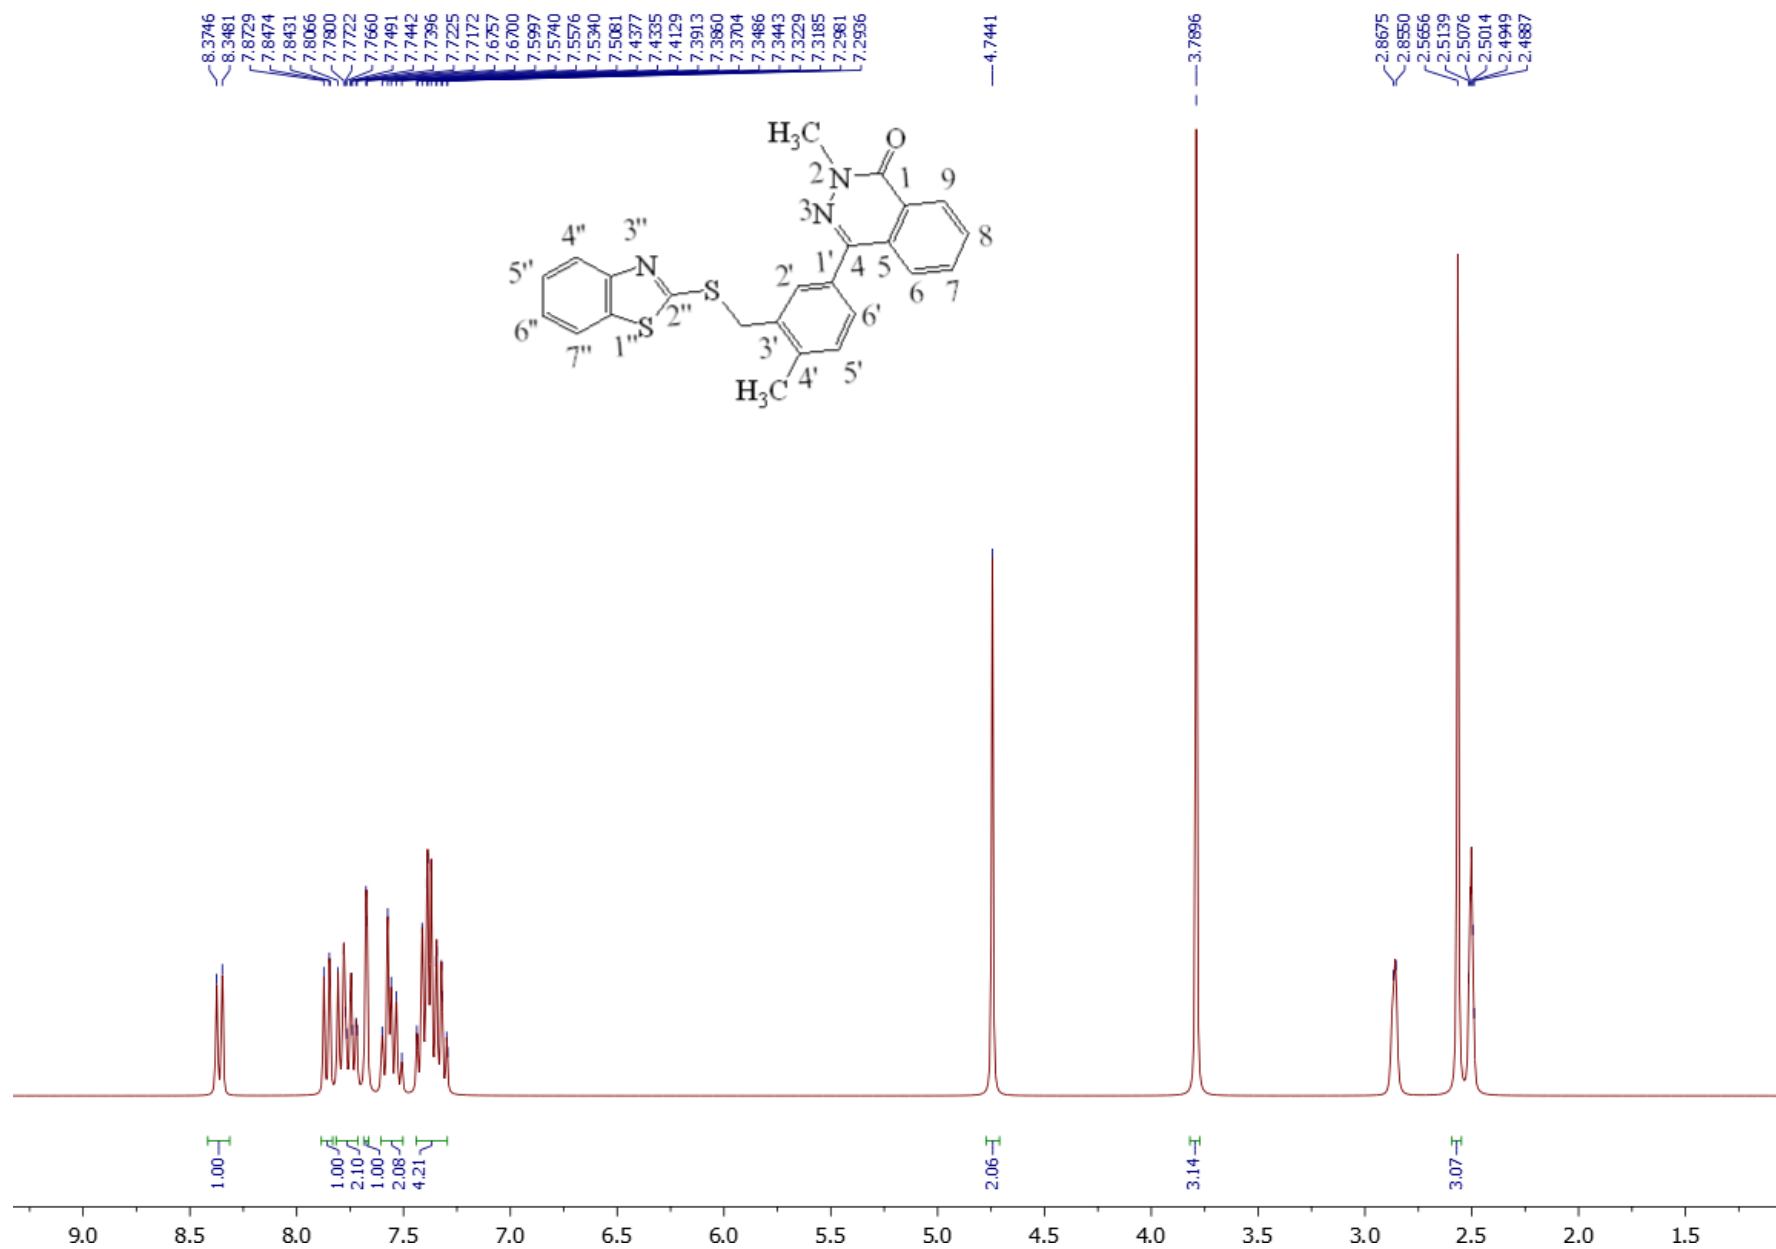

CARBON\_01  
ms75095

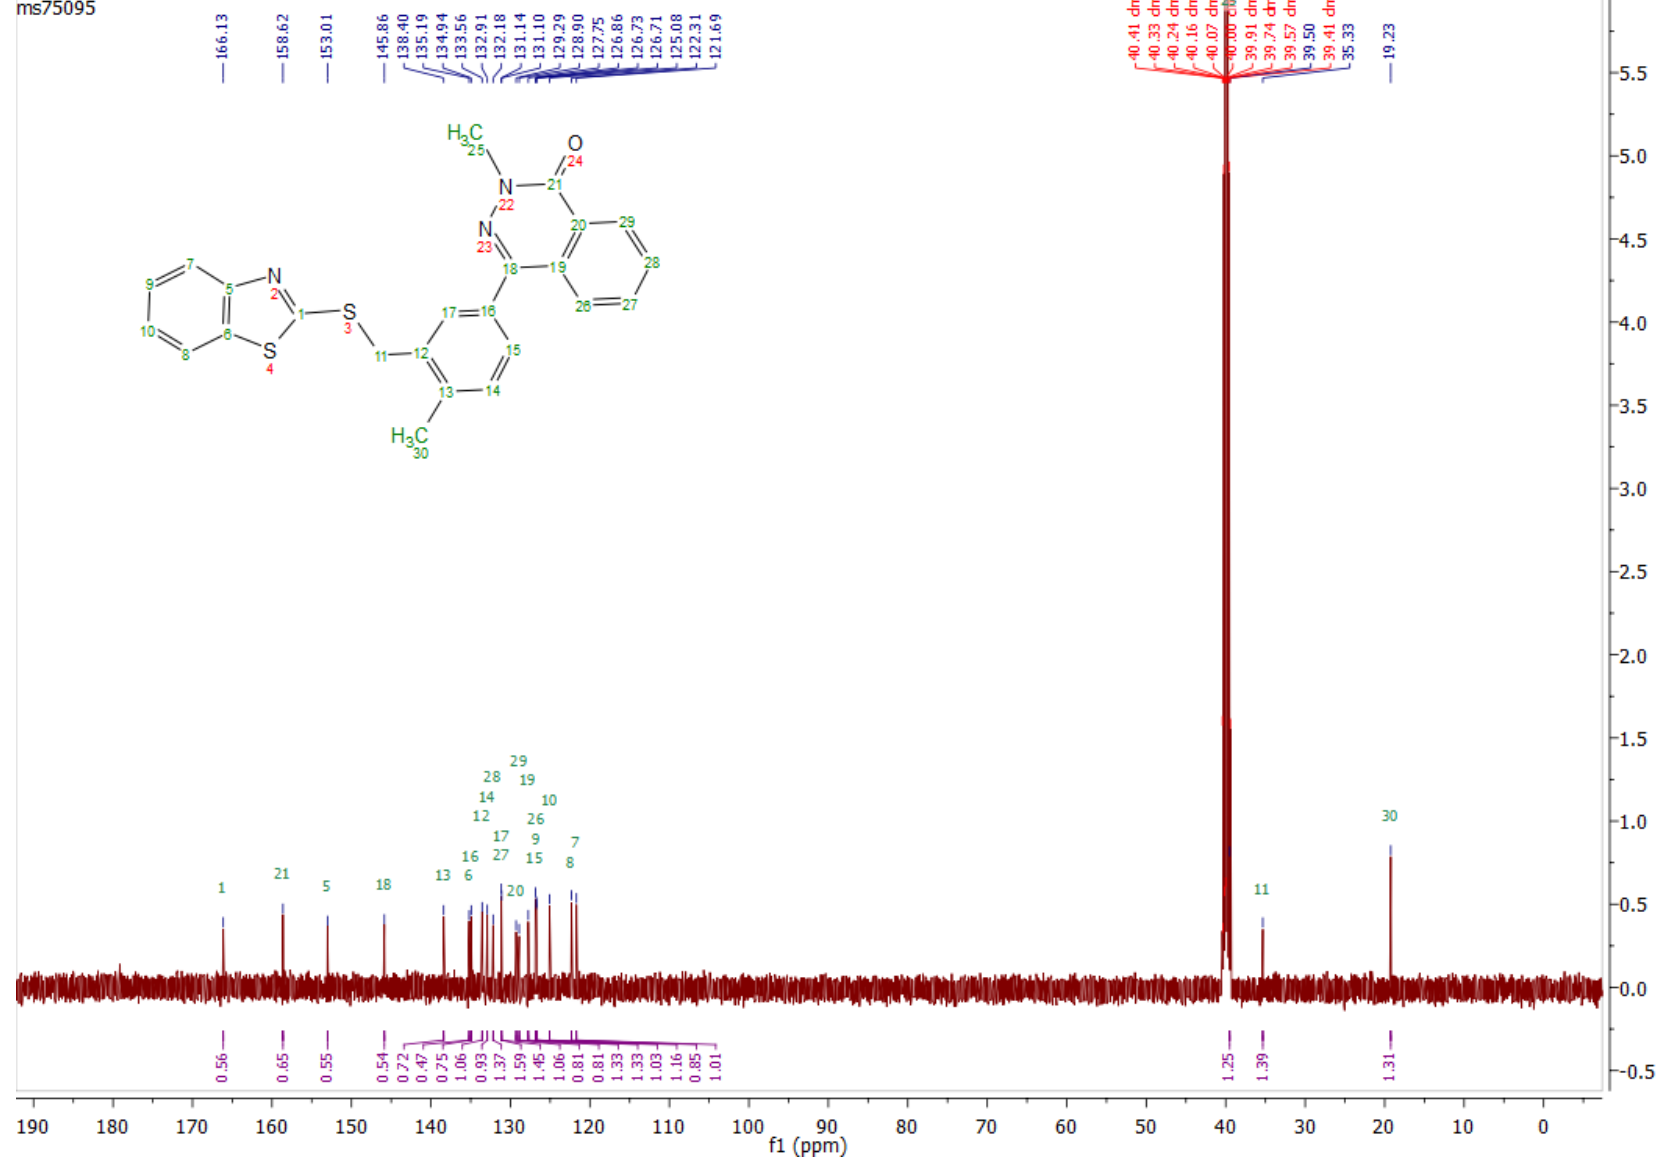

# Compound 2j

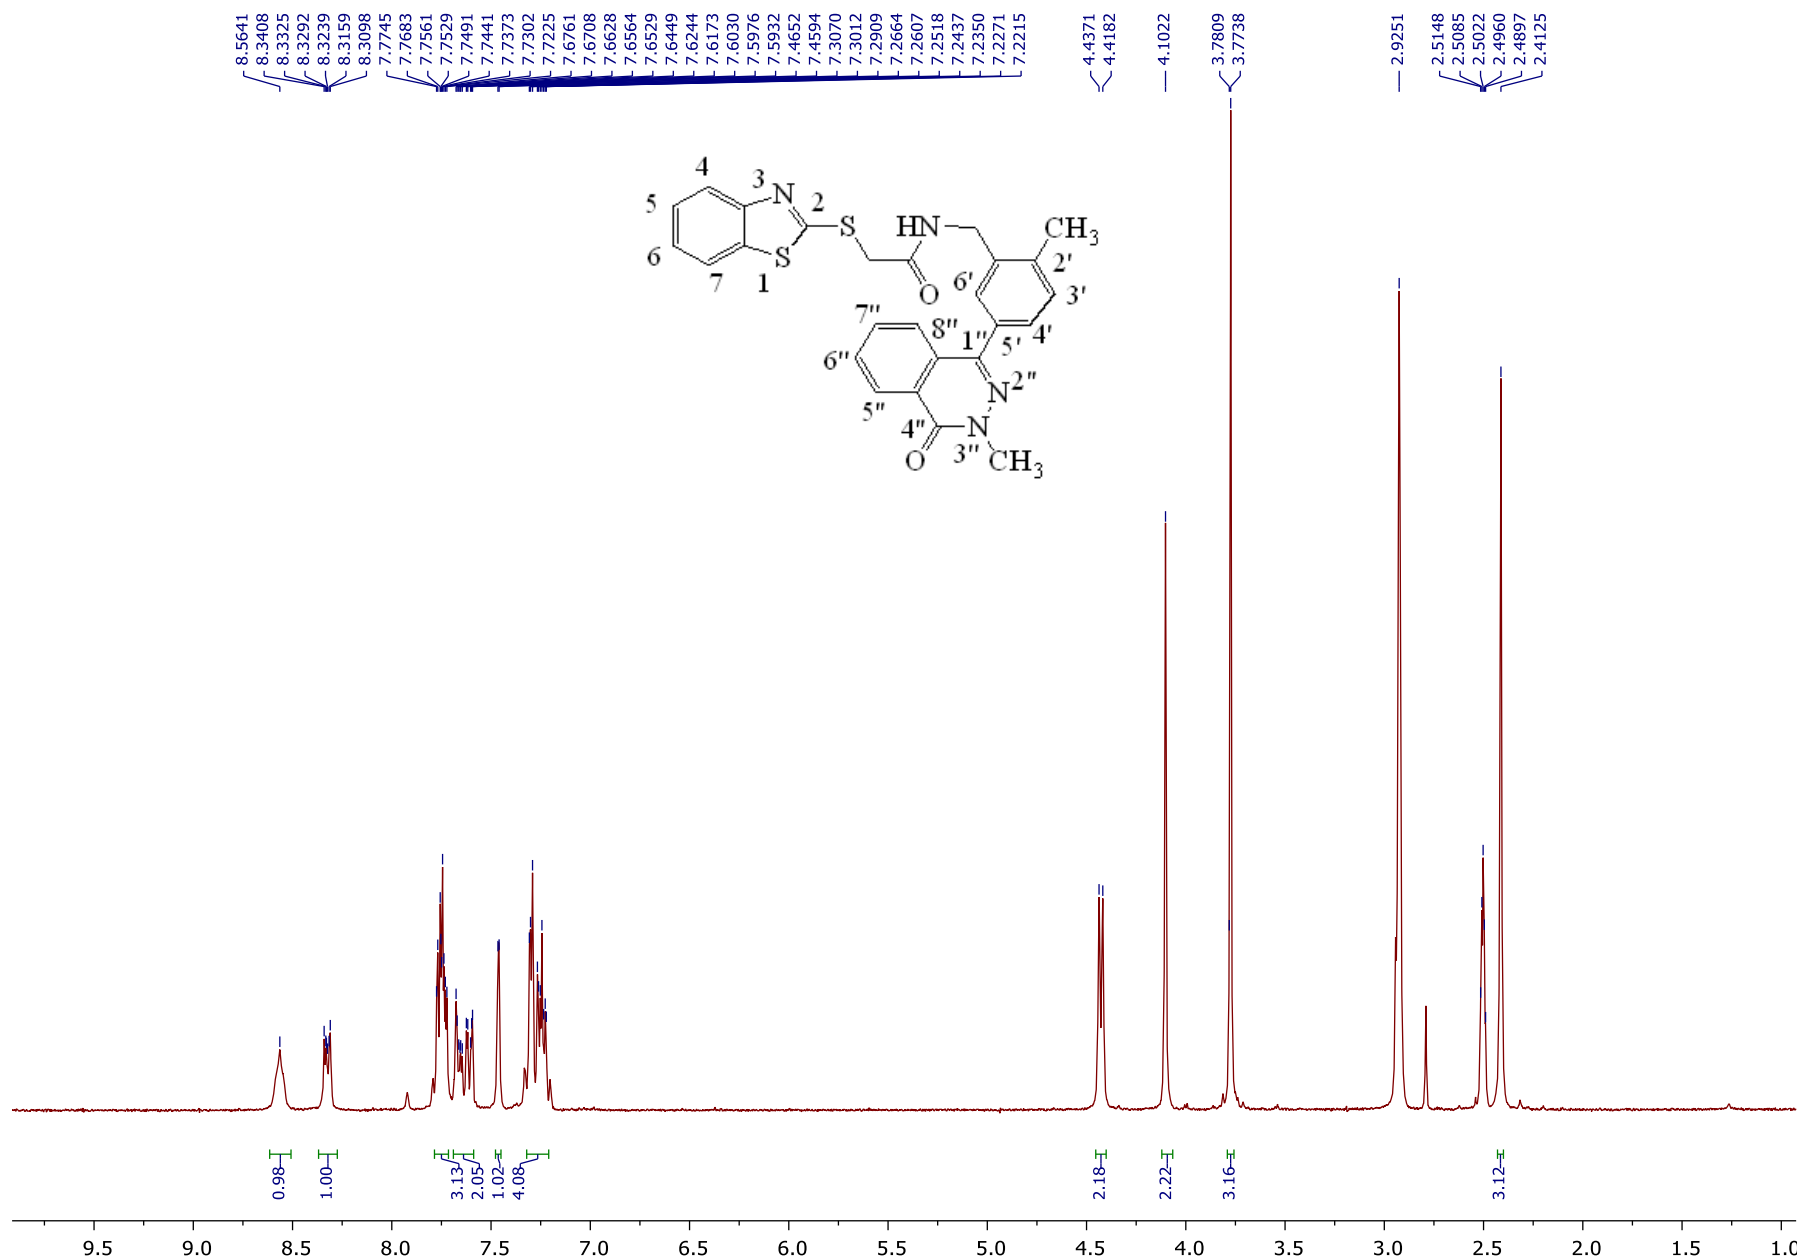

CARBON\_01  
3s-94256

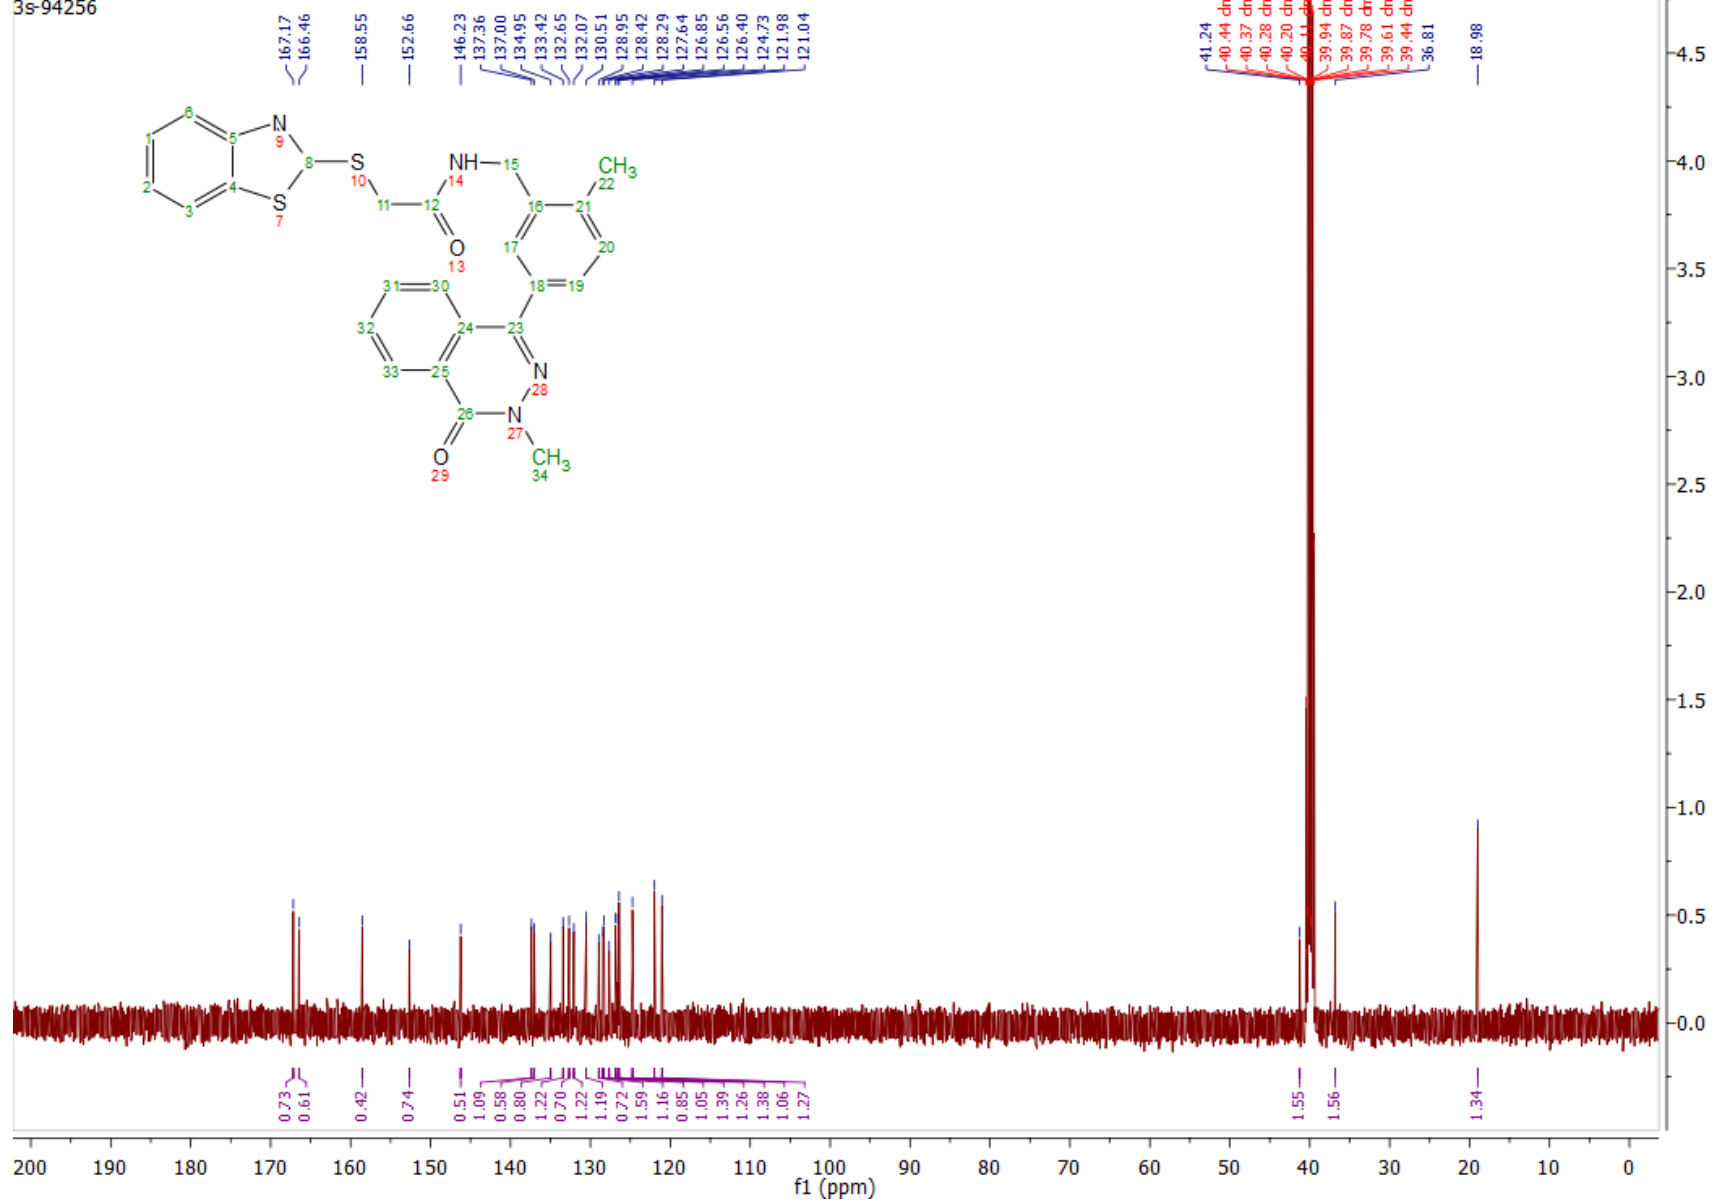

# Compound 2k

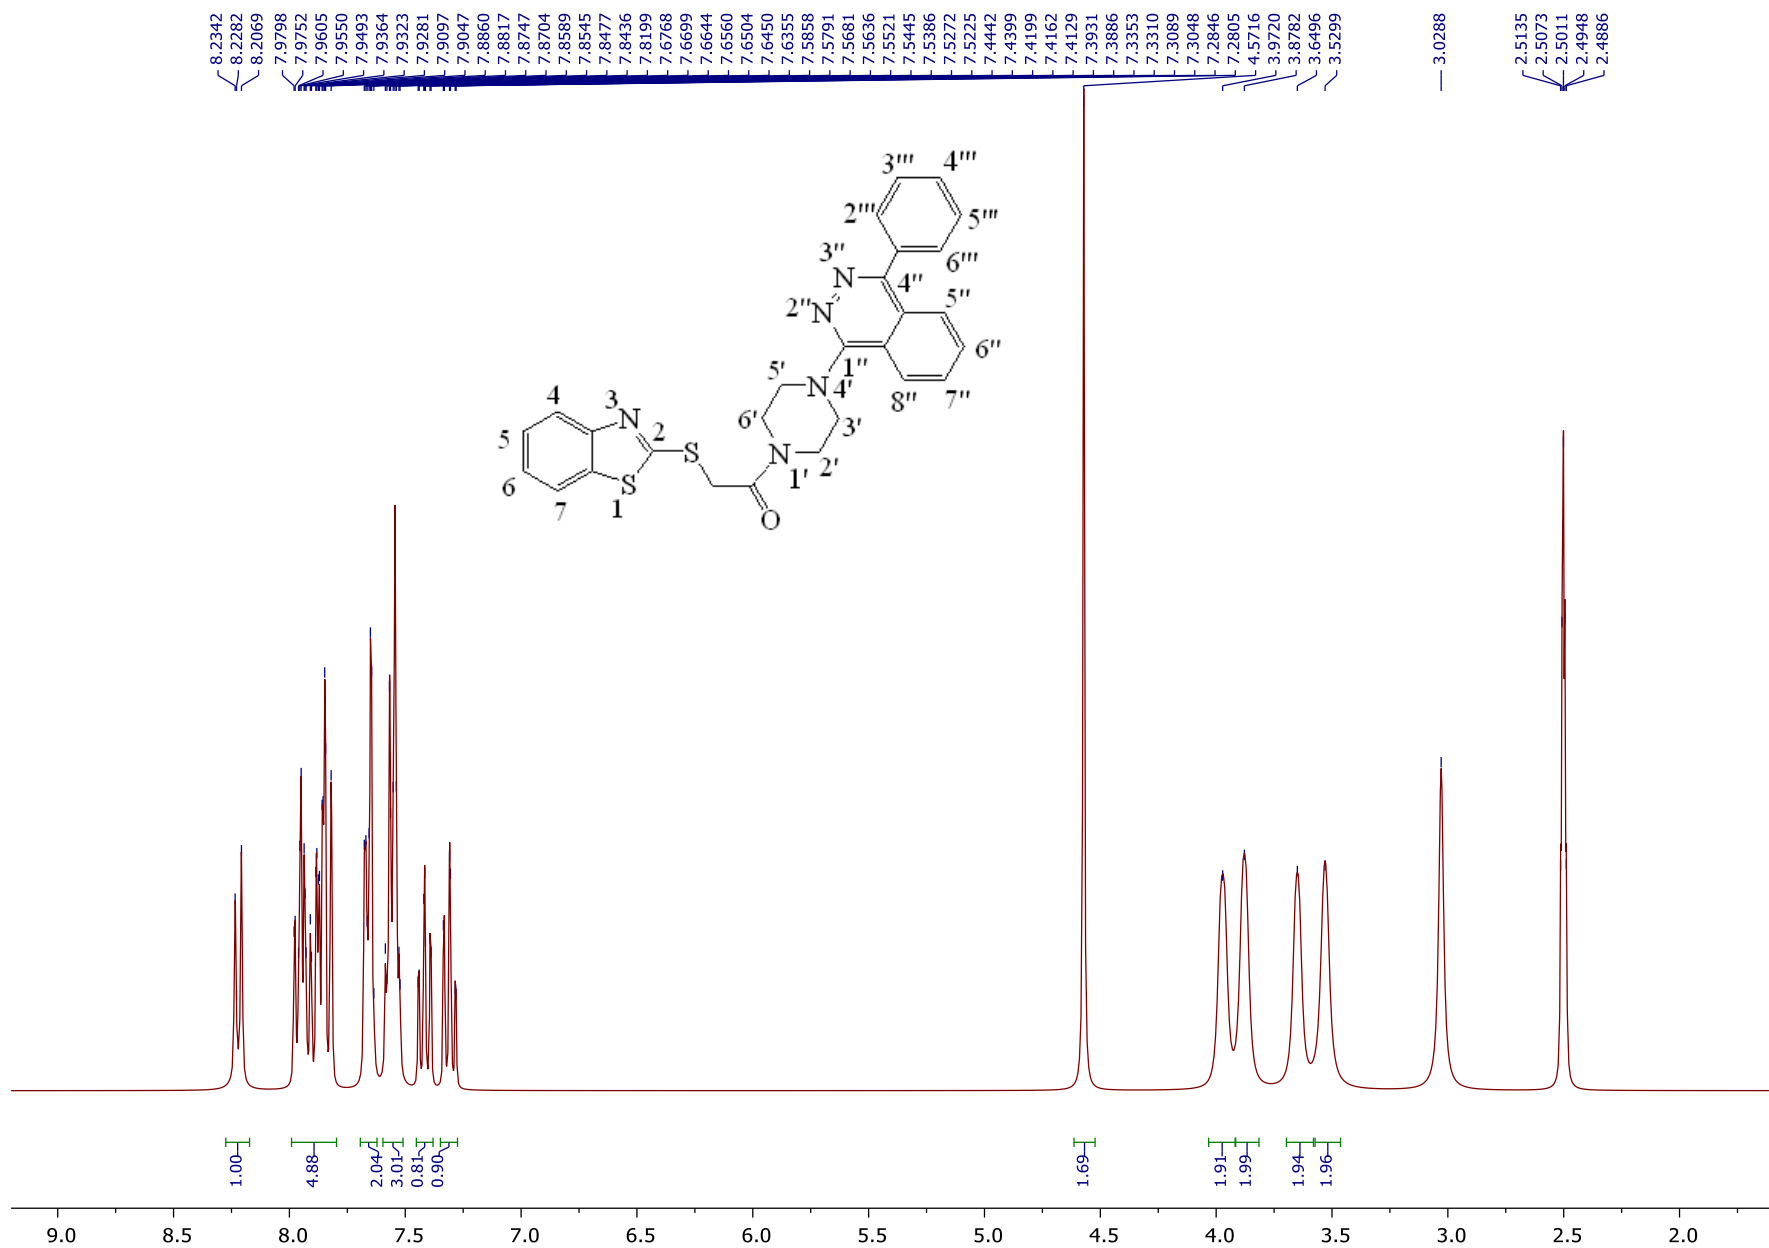

CARBON\_01

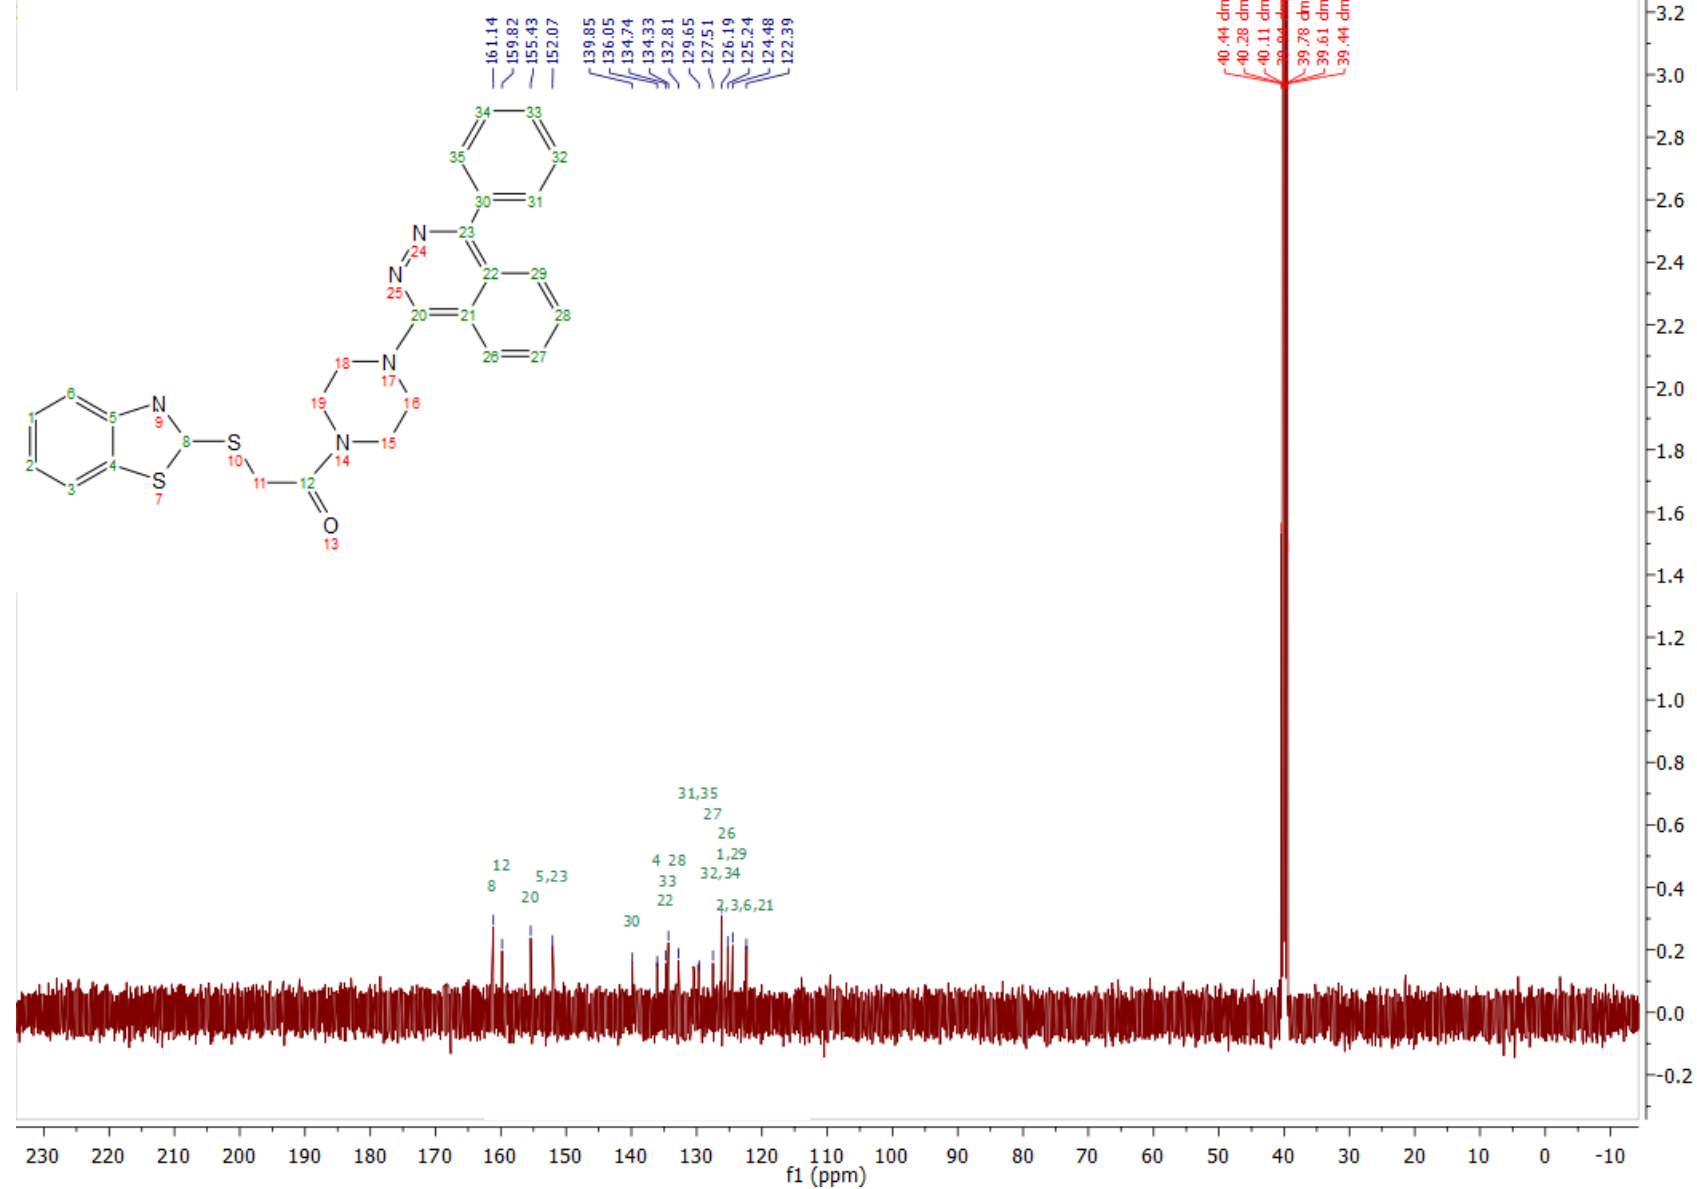

# Compound 2l

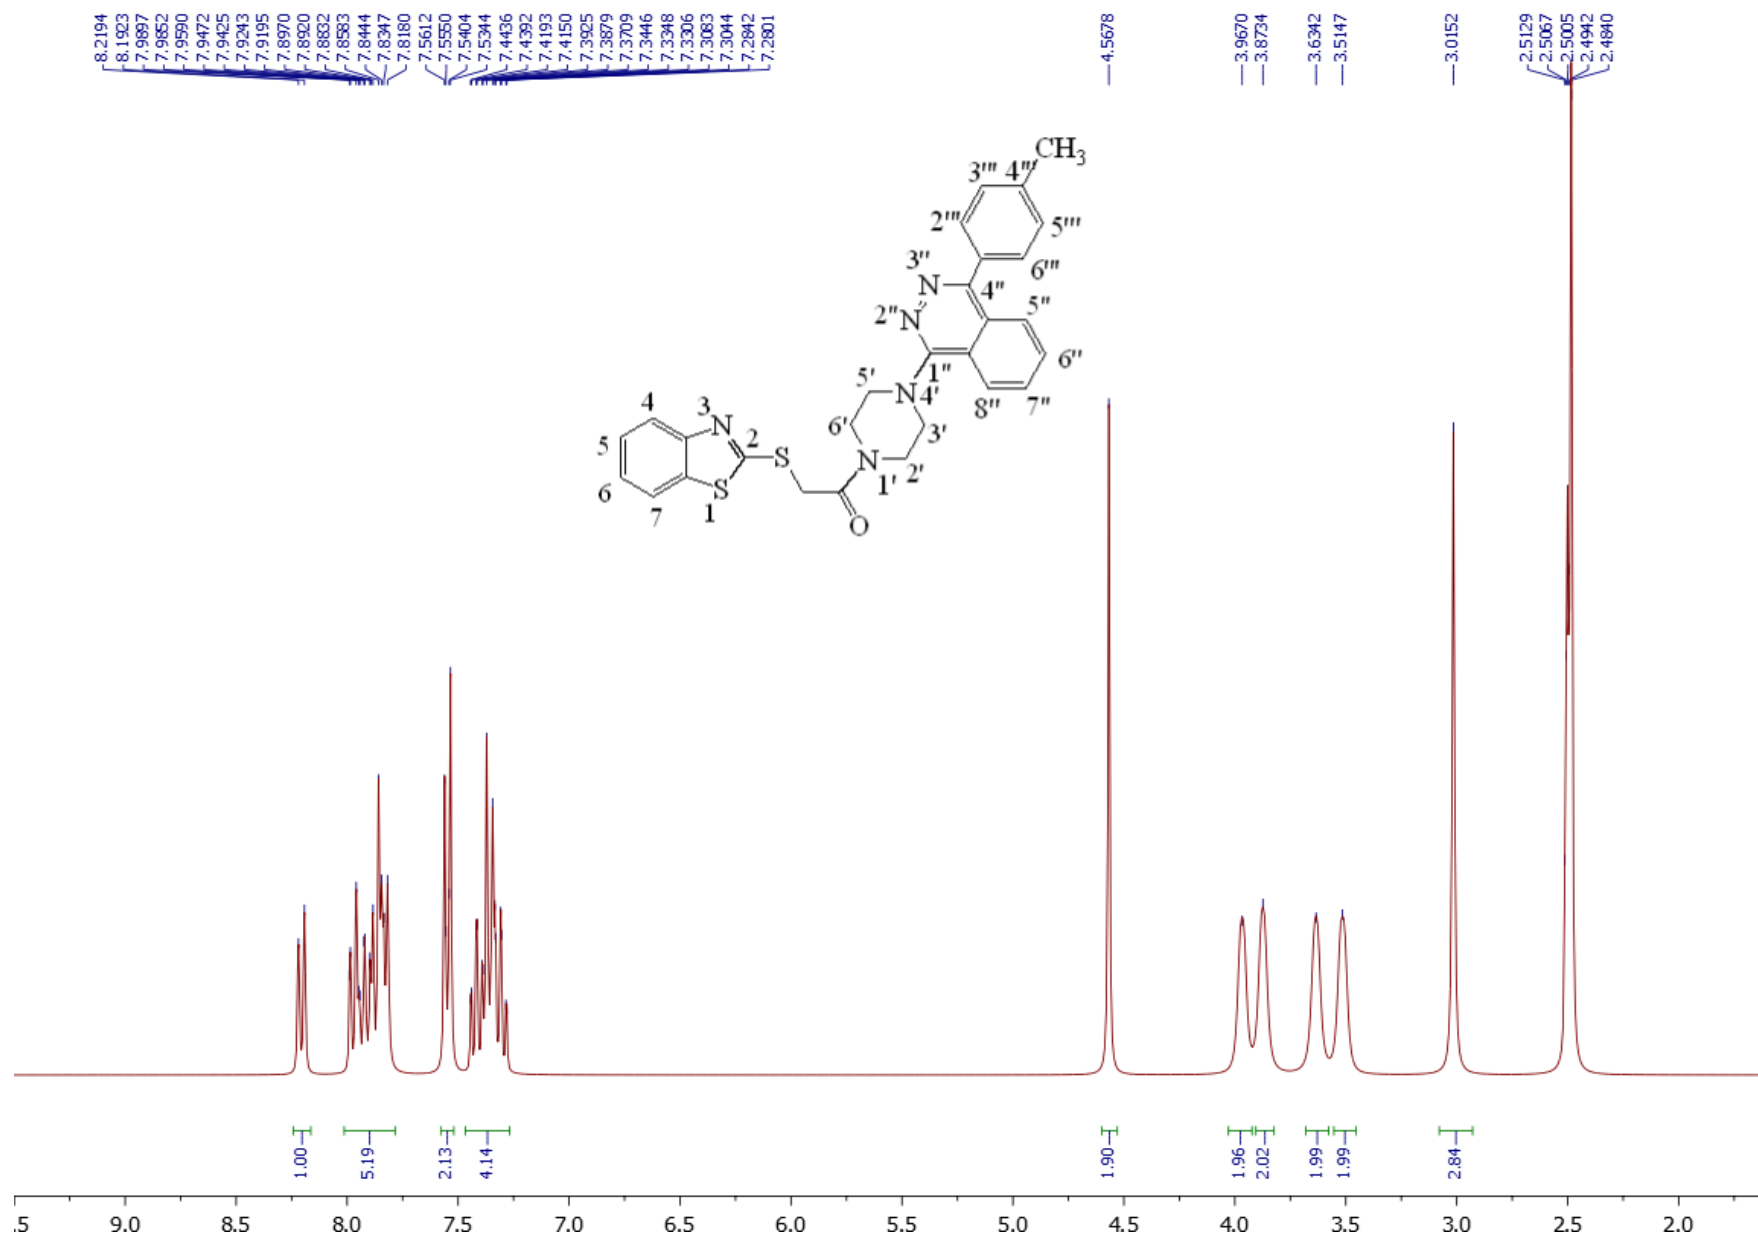

CARBON\_01

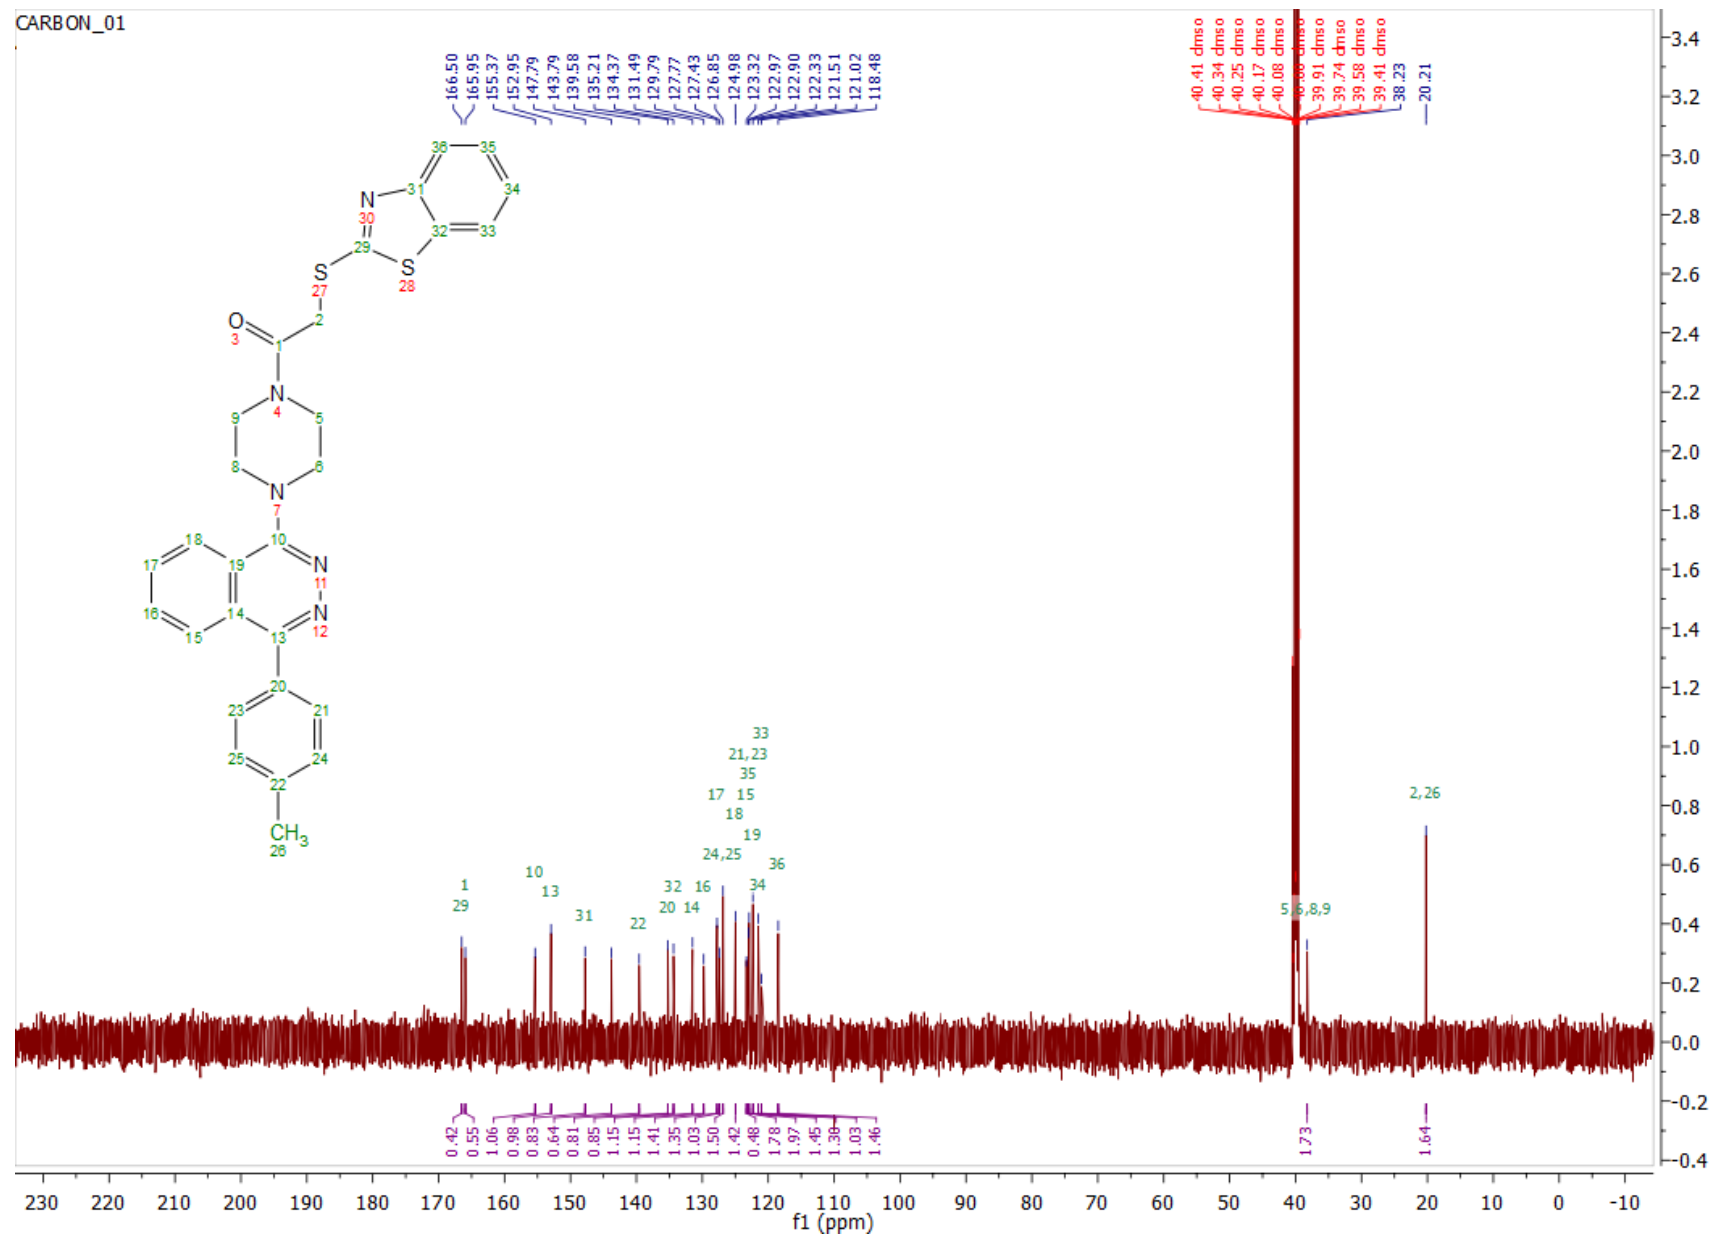



# Compound 2m

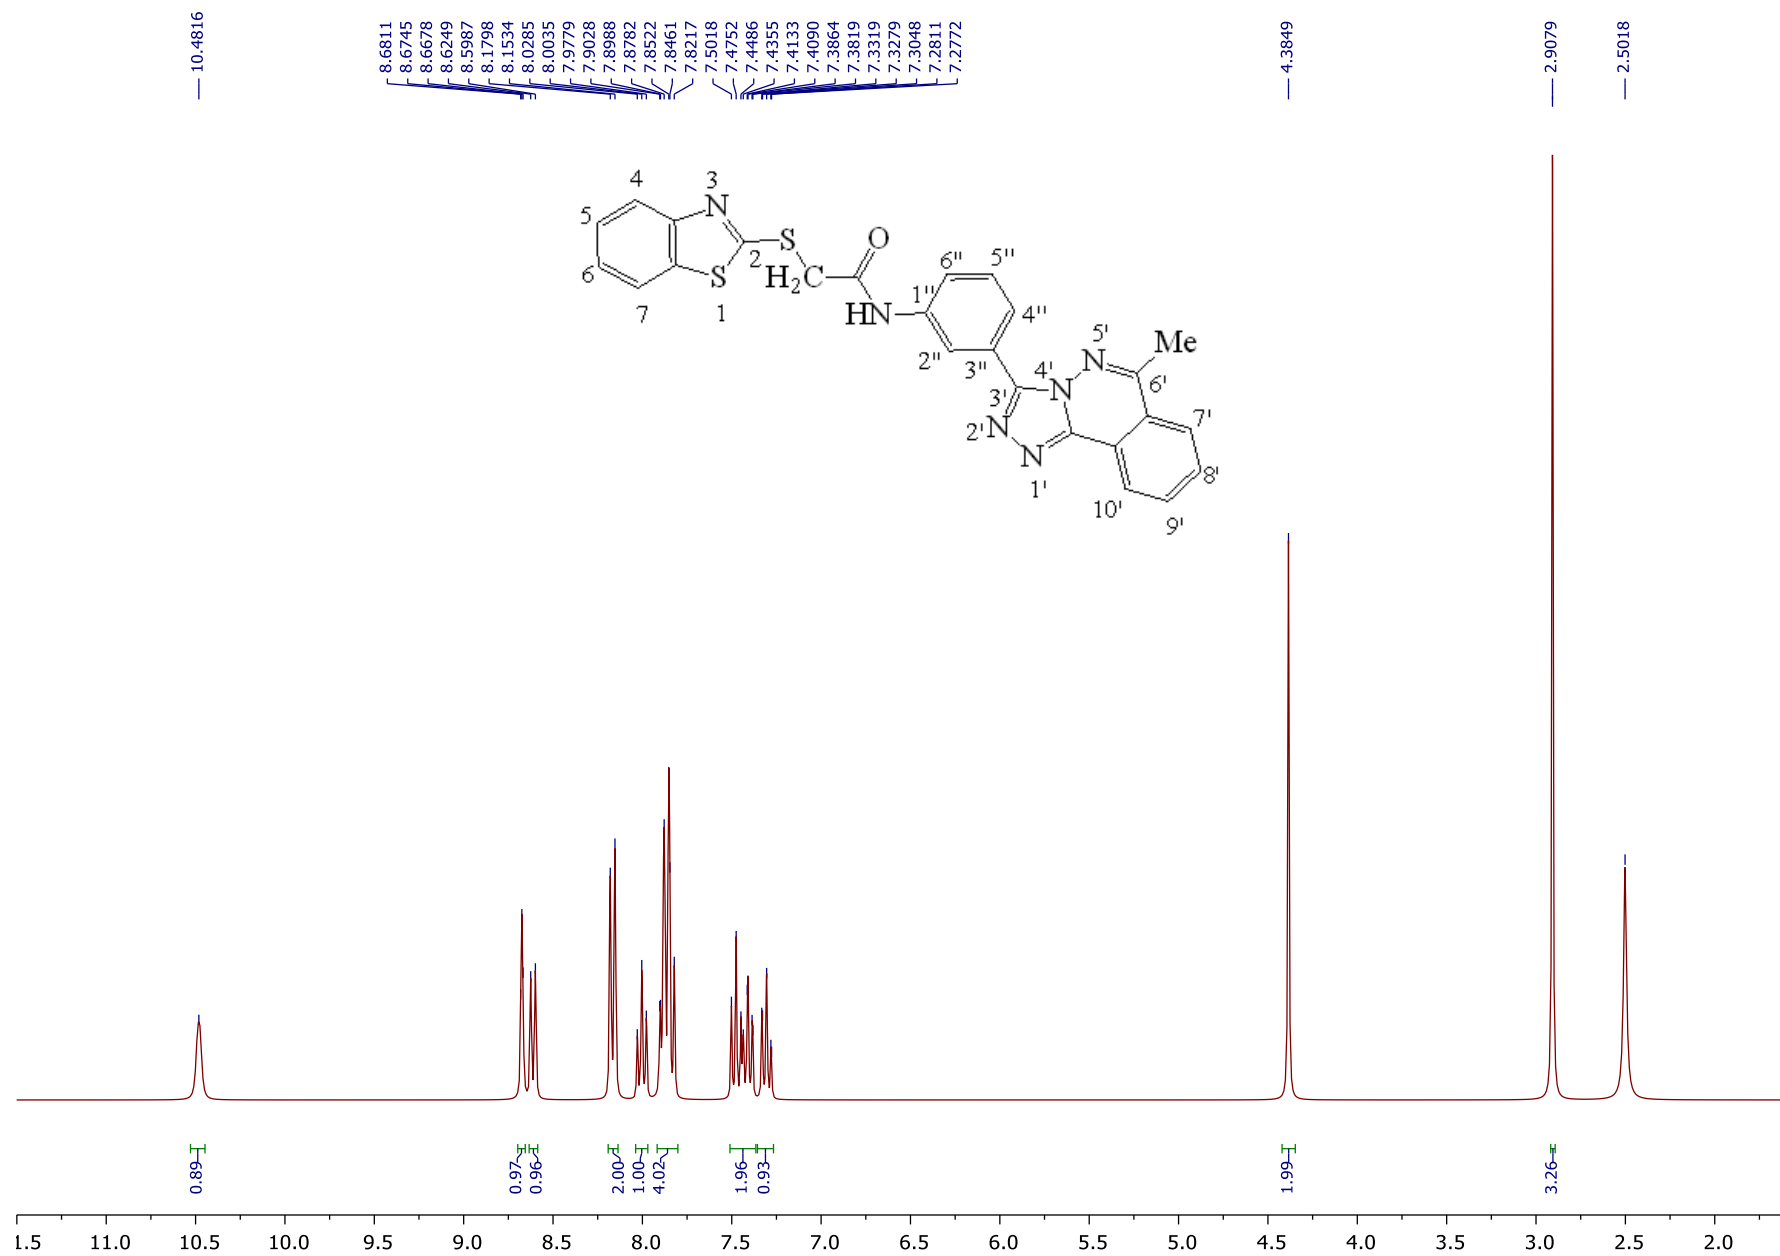

CARBON\_01  
4S\_28885

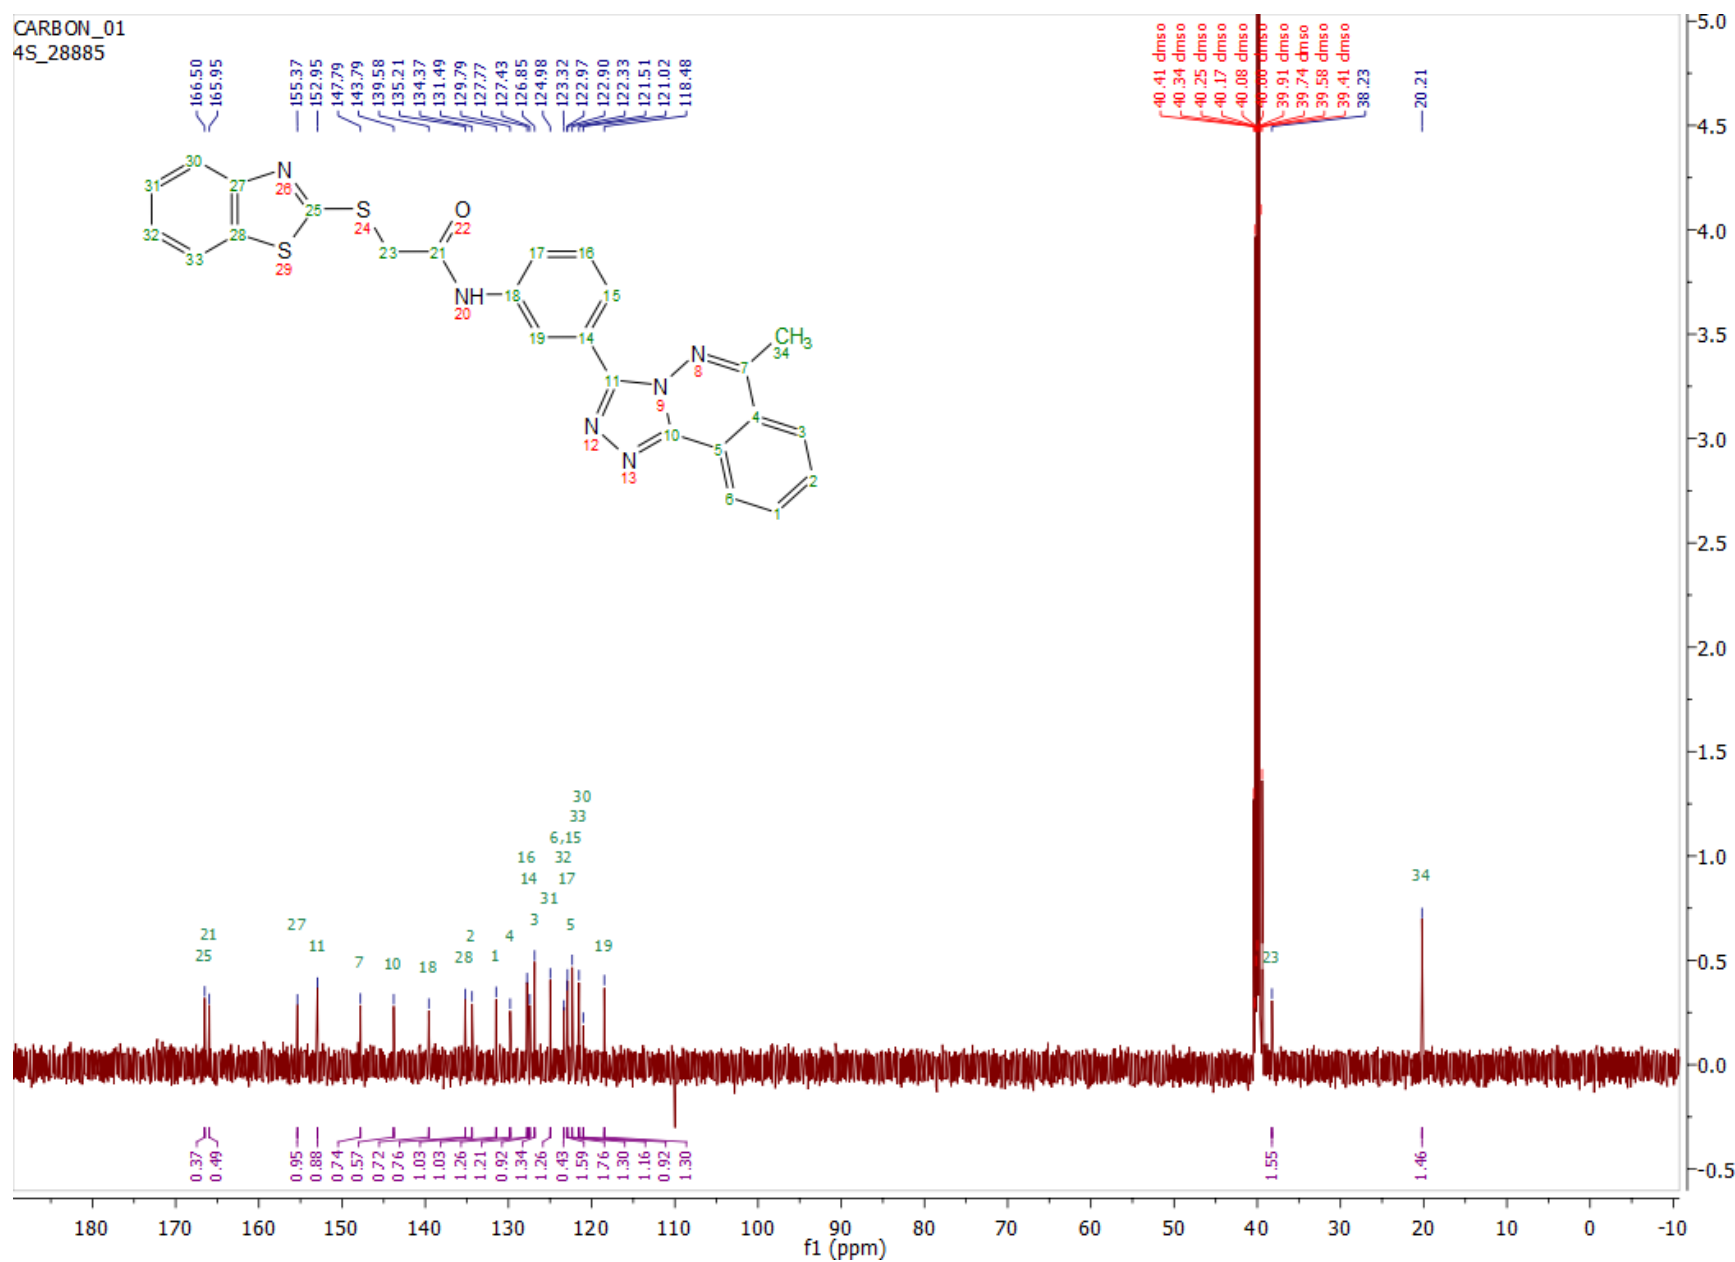

# Compound 2n

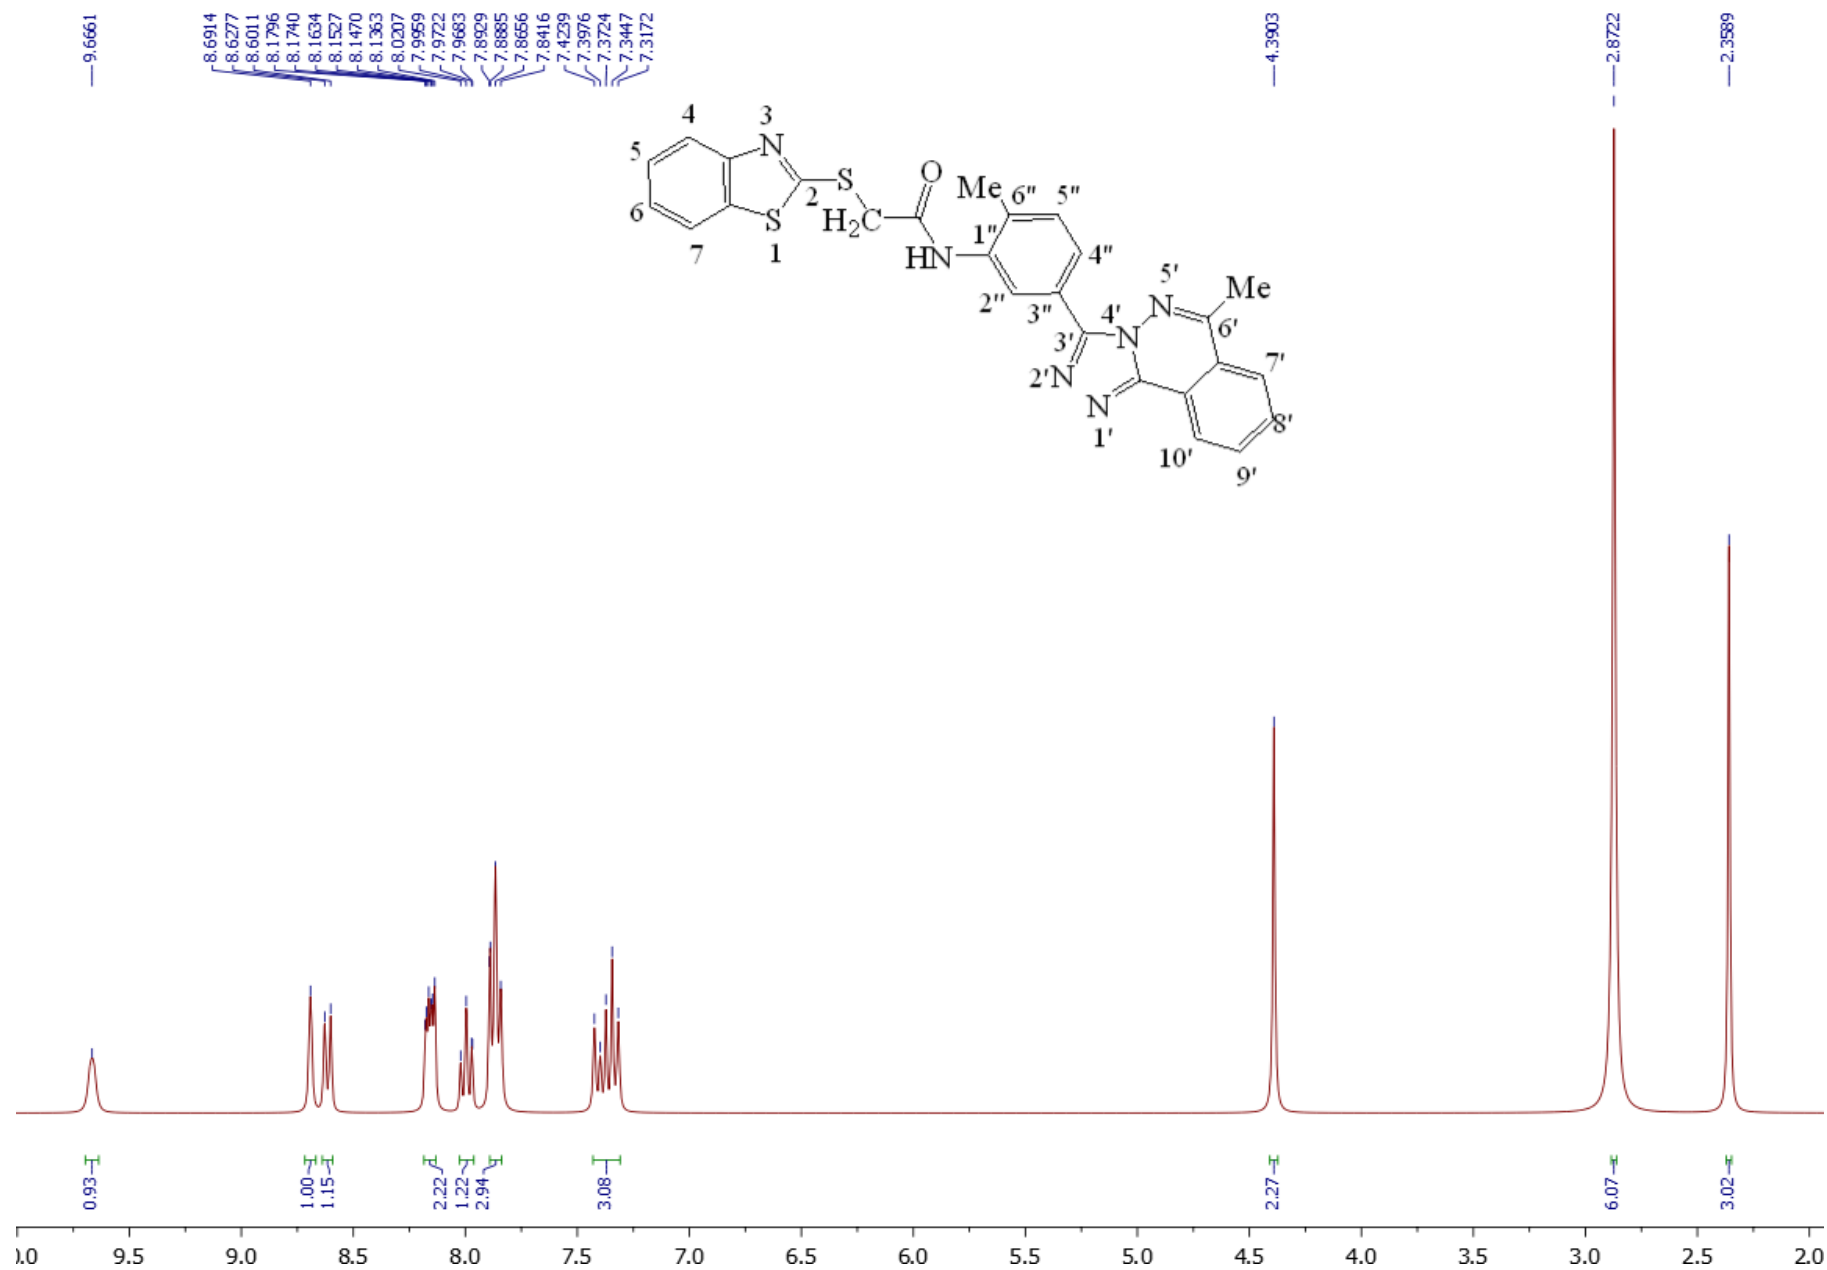

CARBON\_01

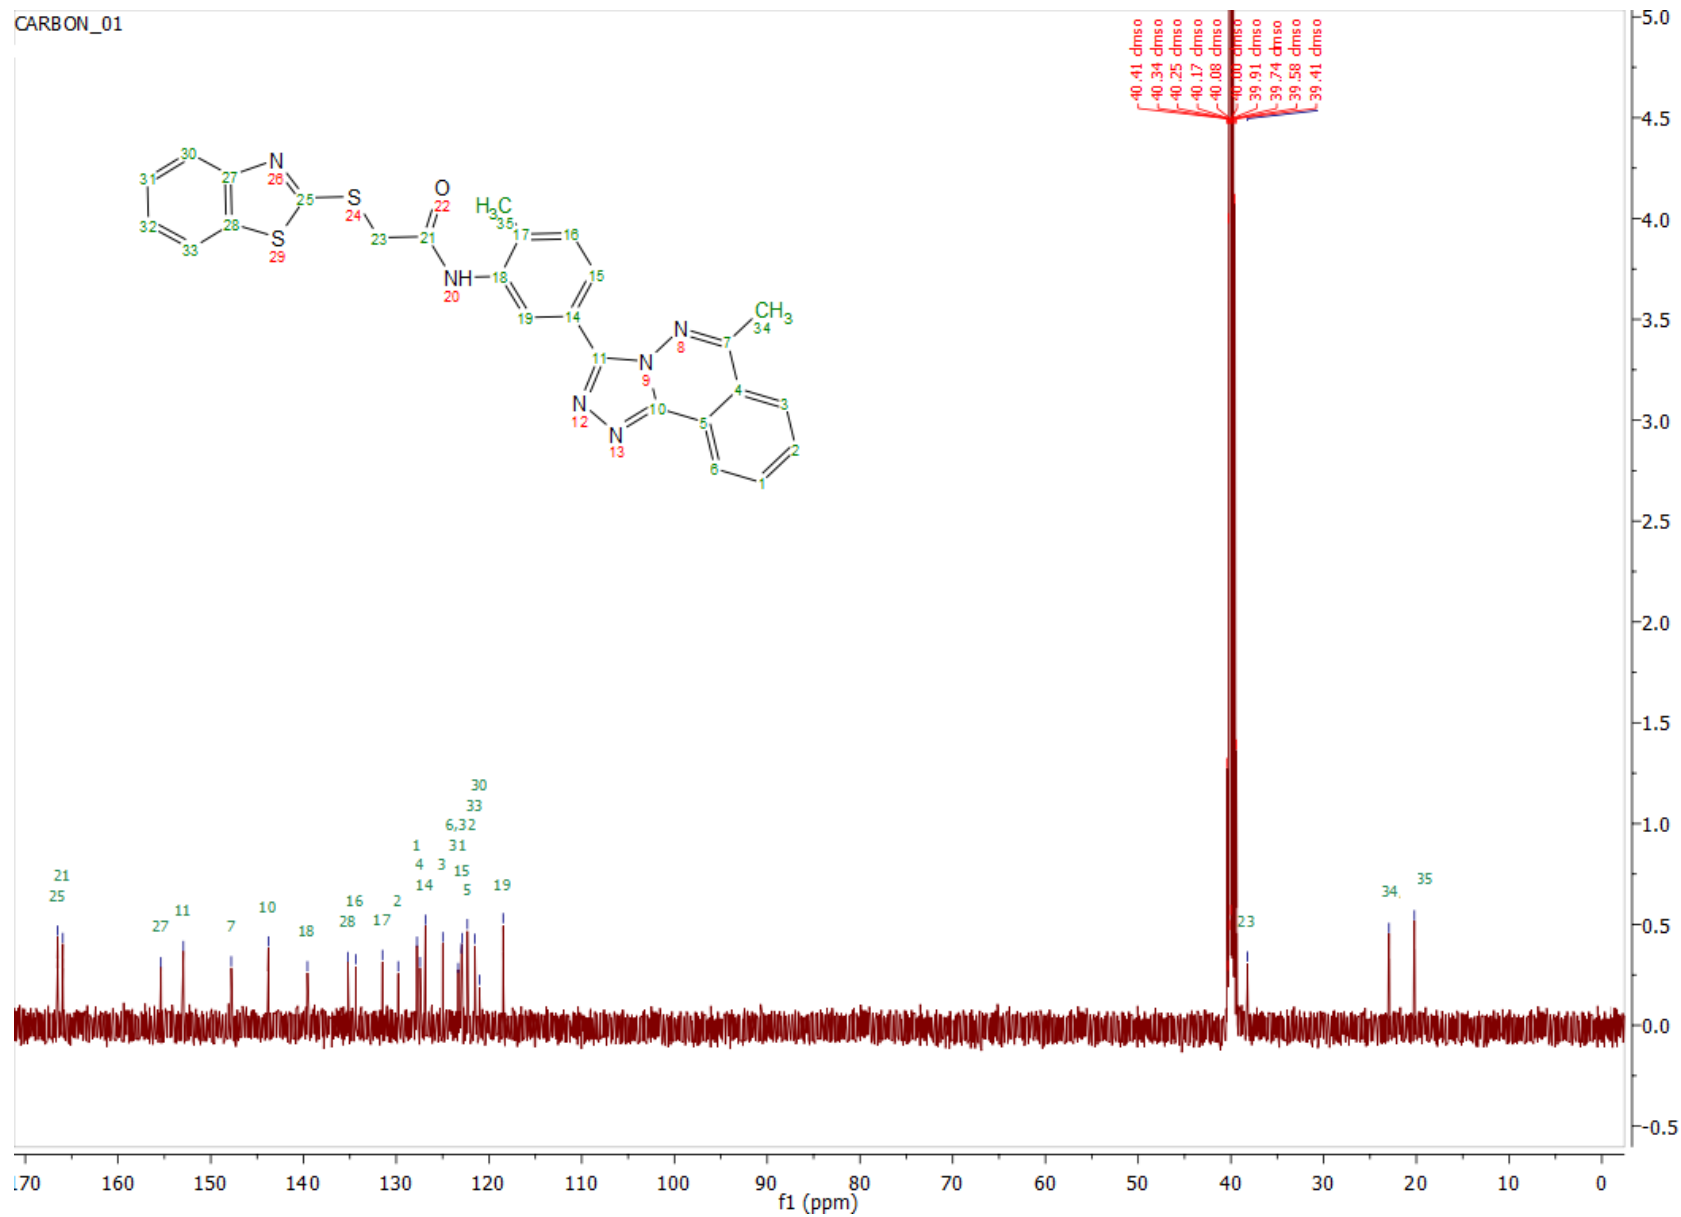

# Compound 2o

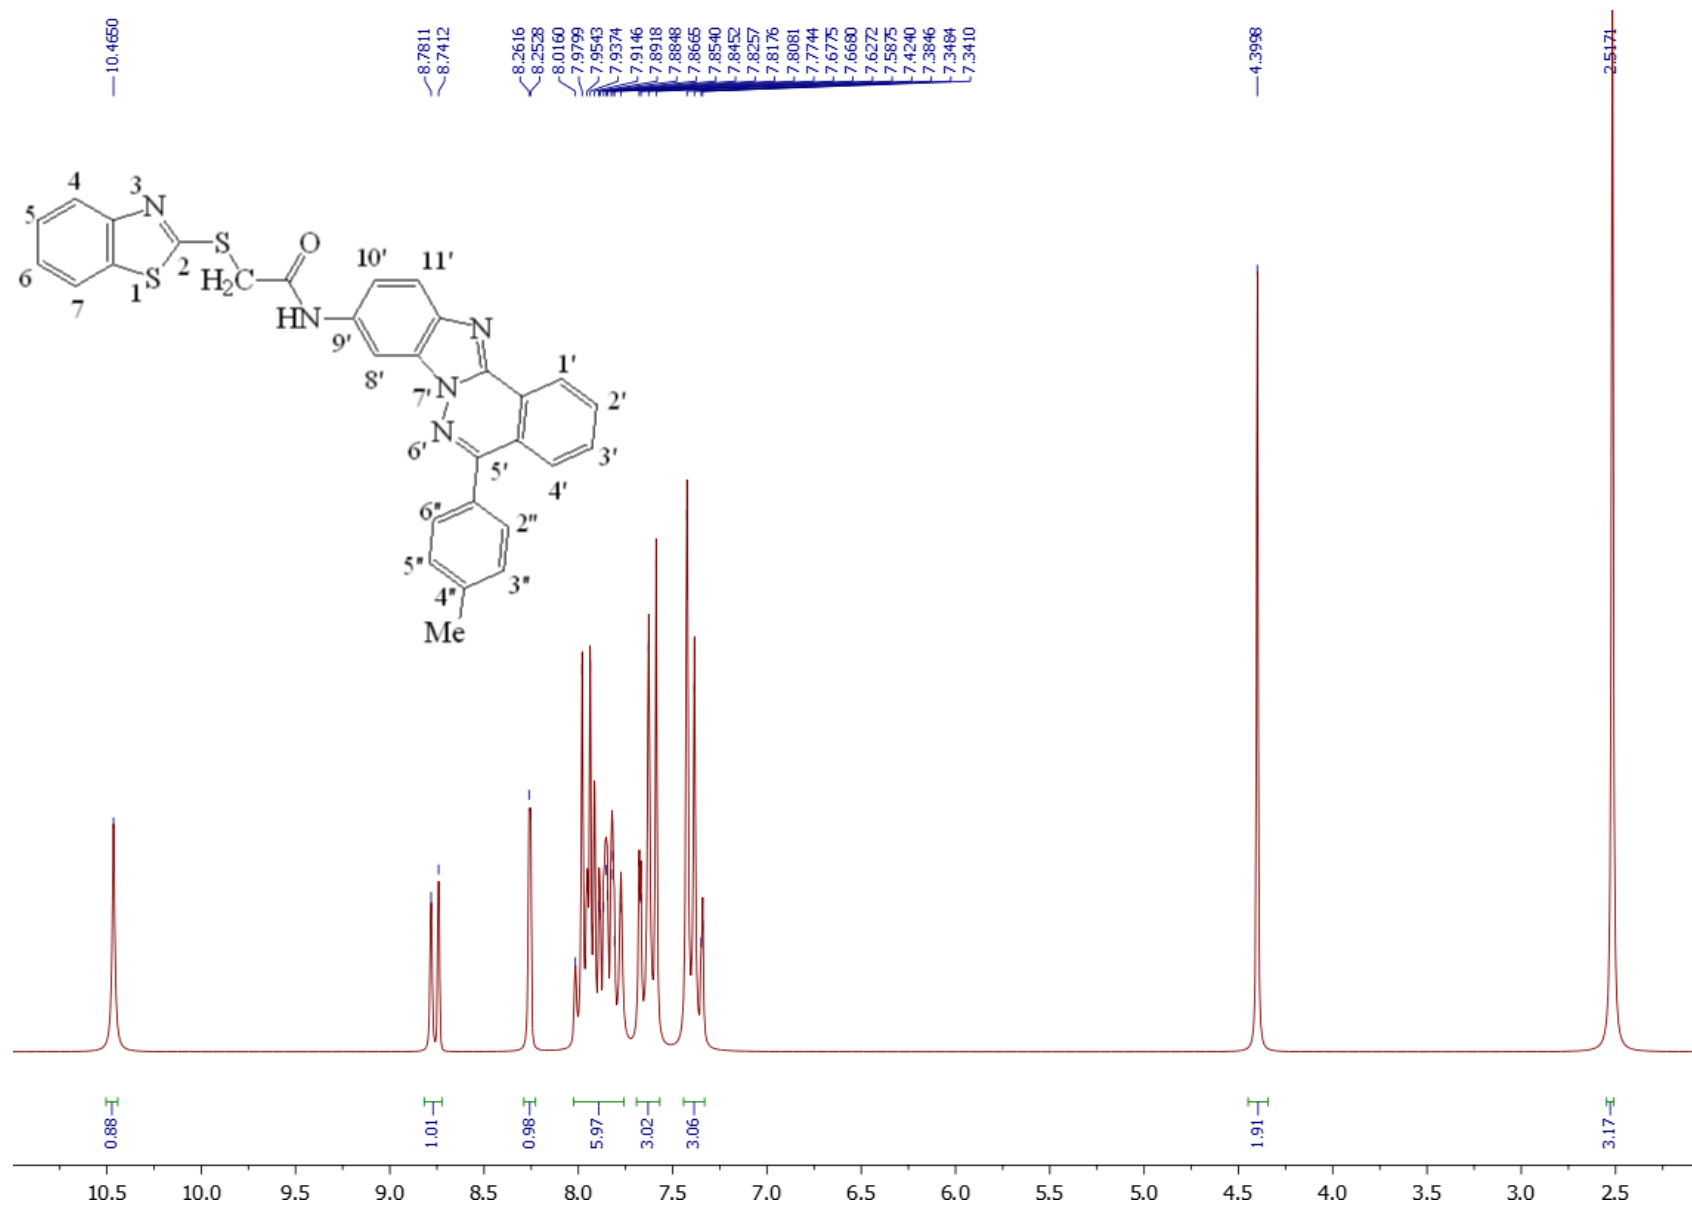

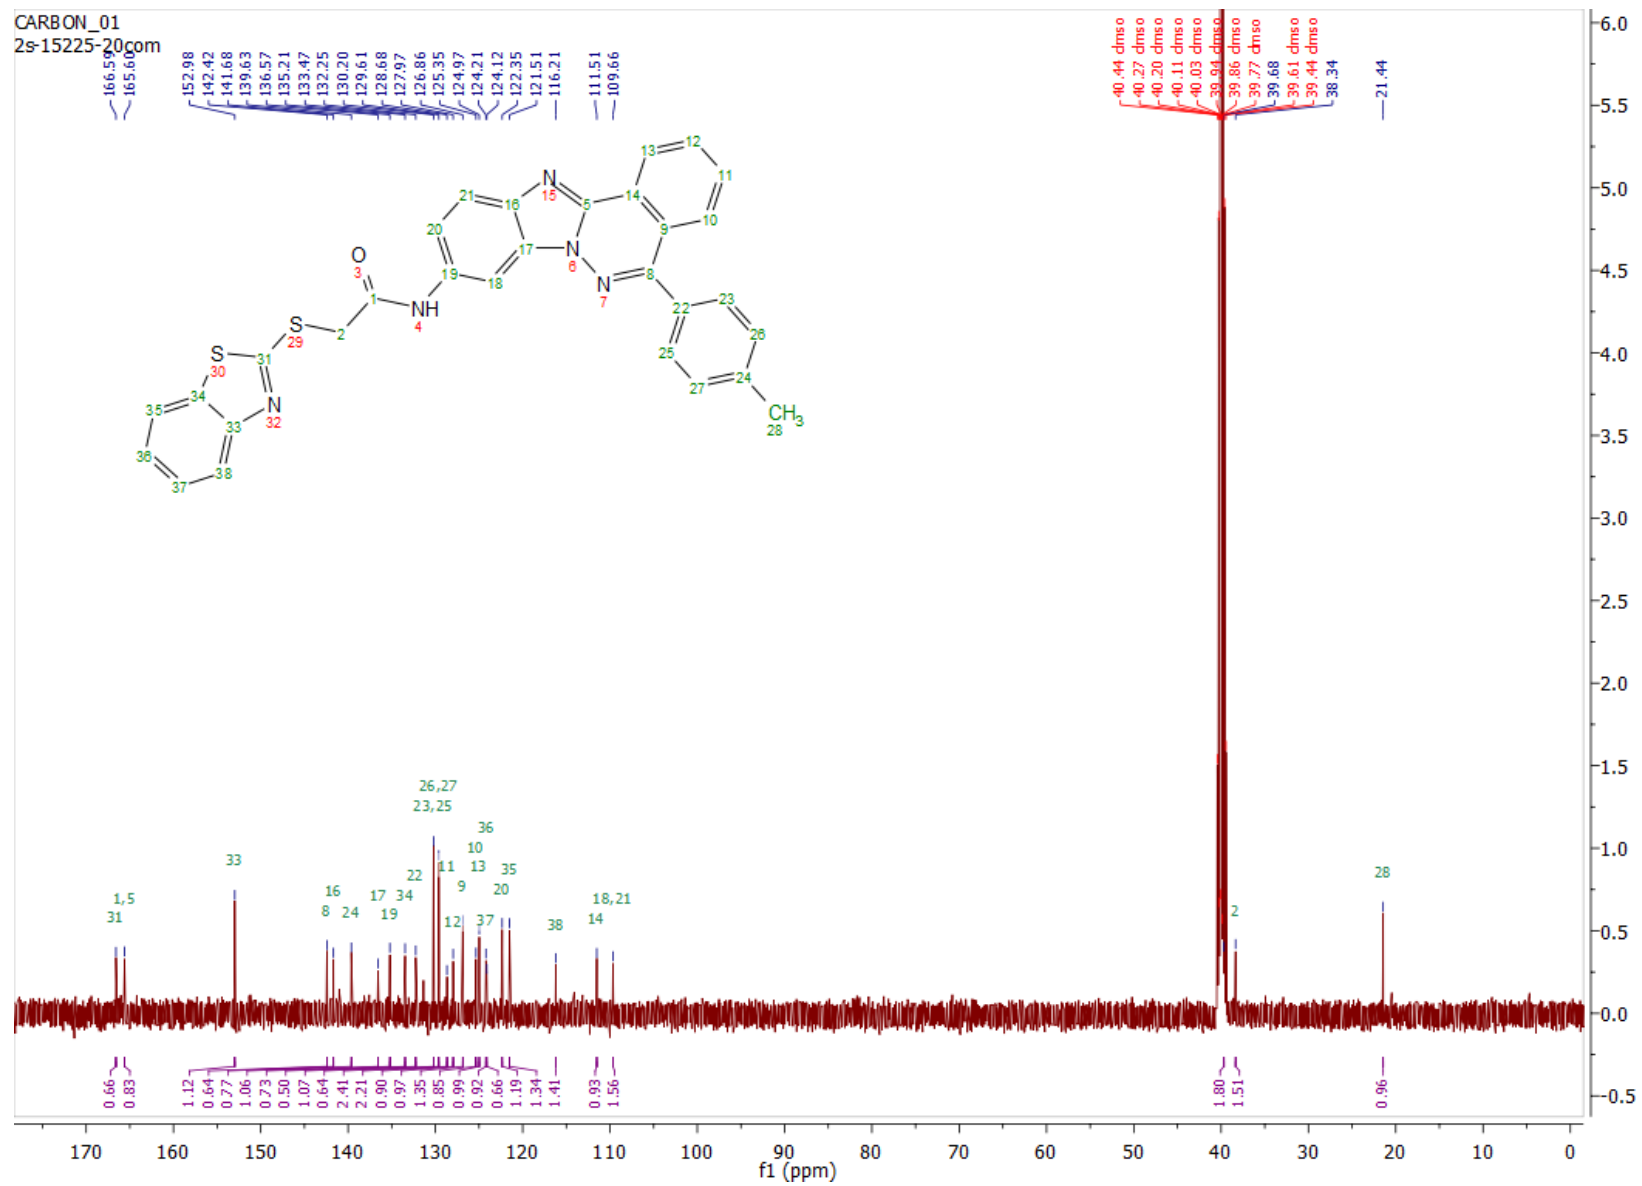

# Compound 3a

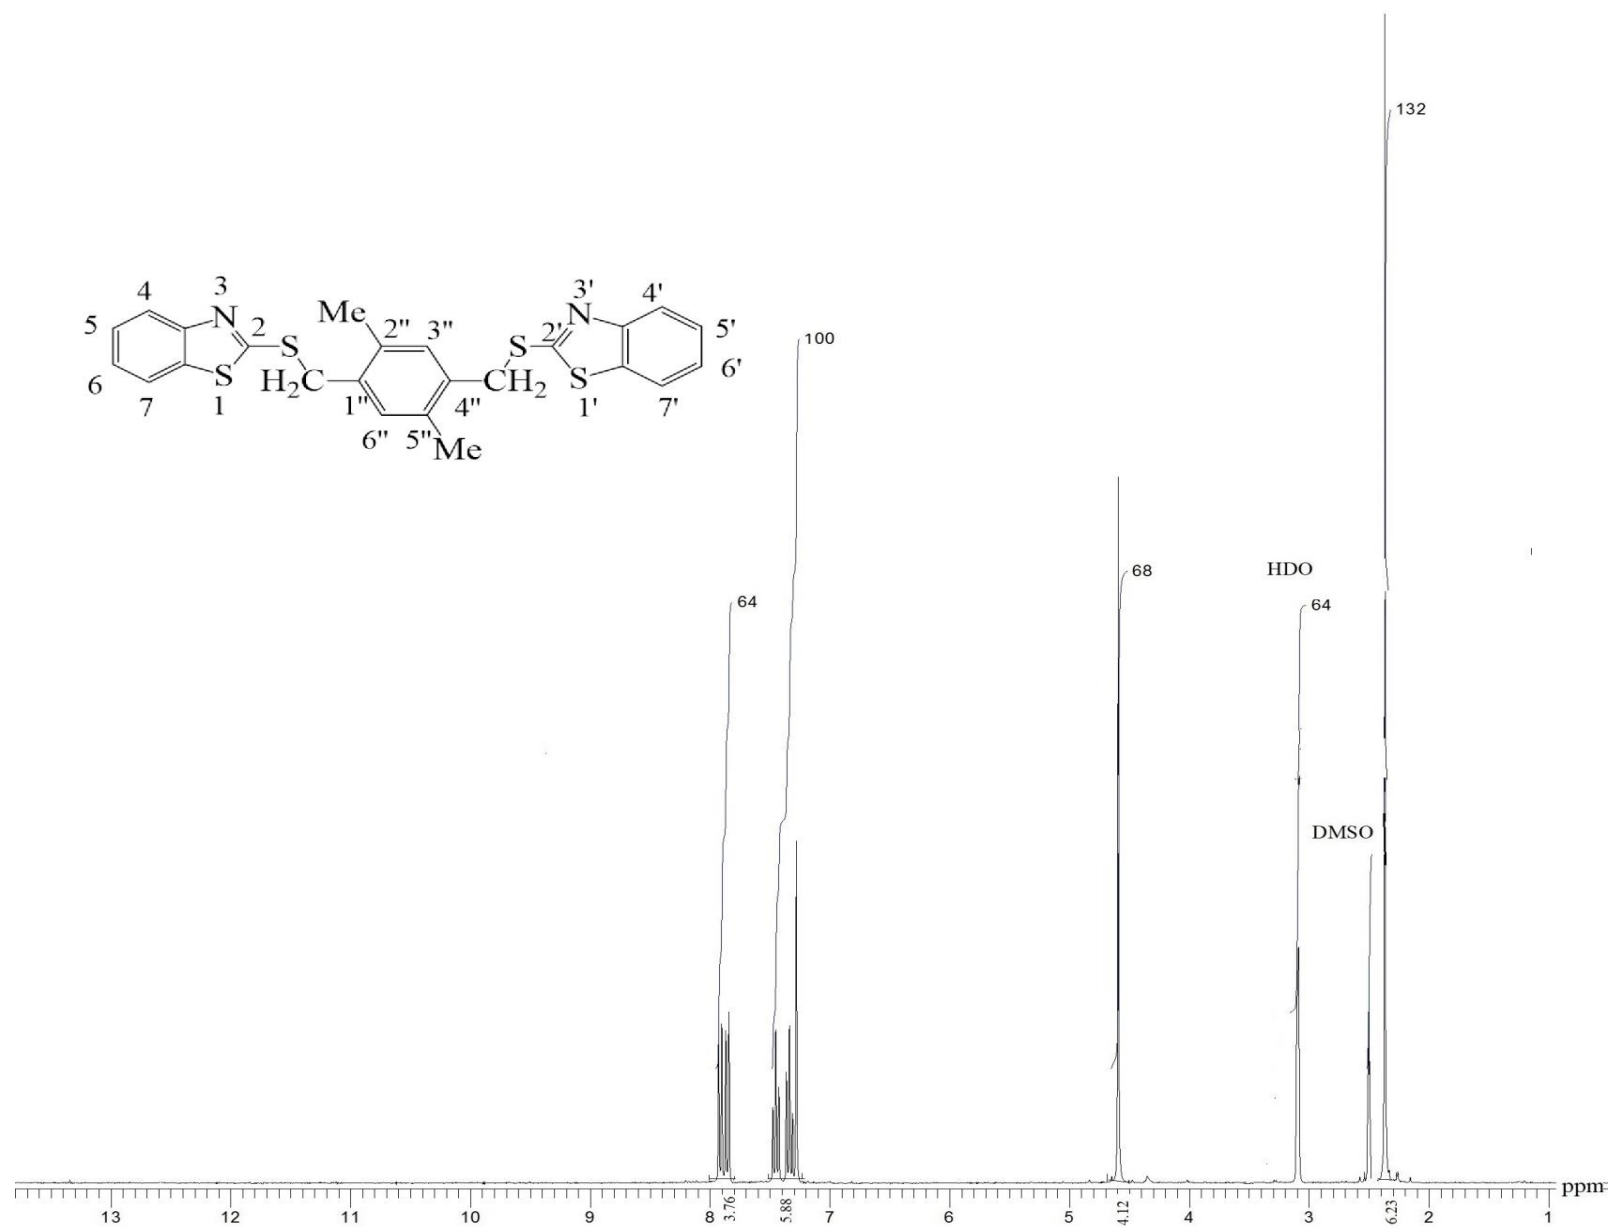

CARBON\_01

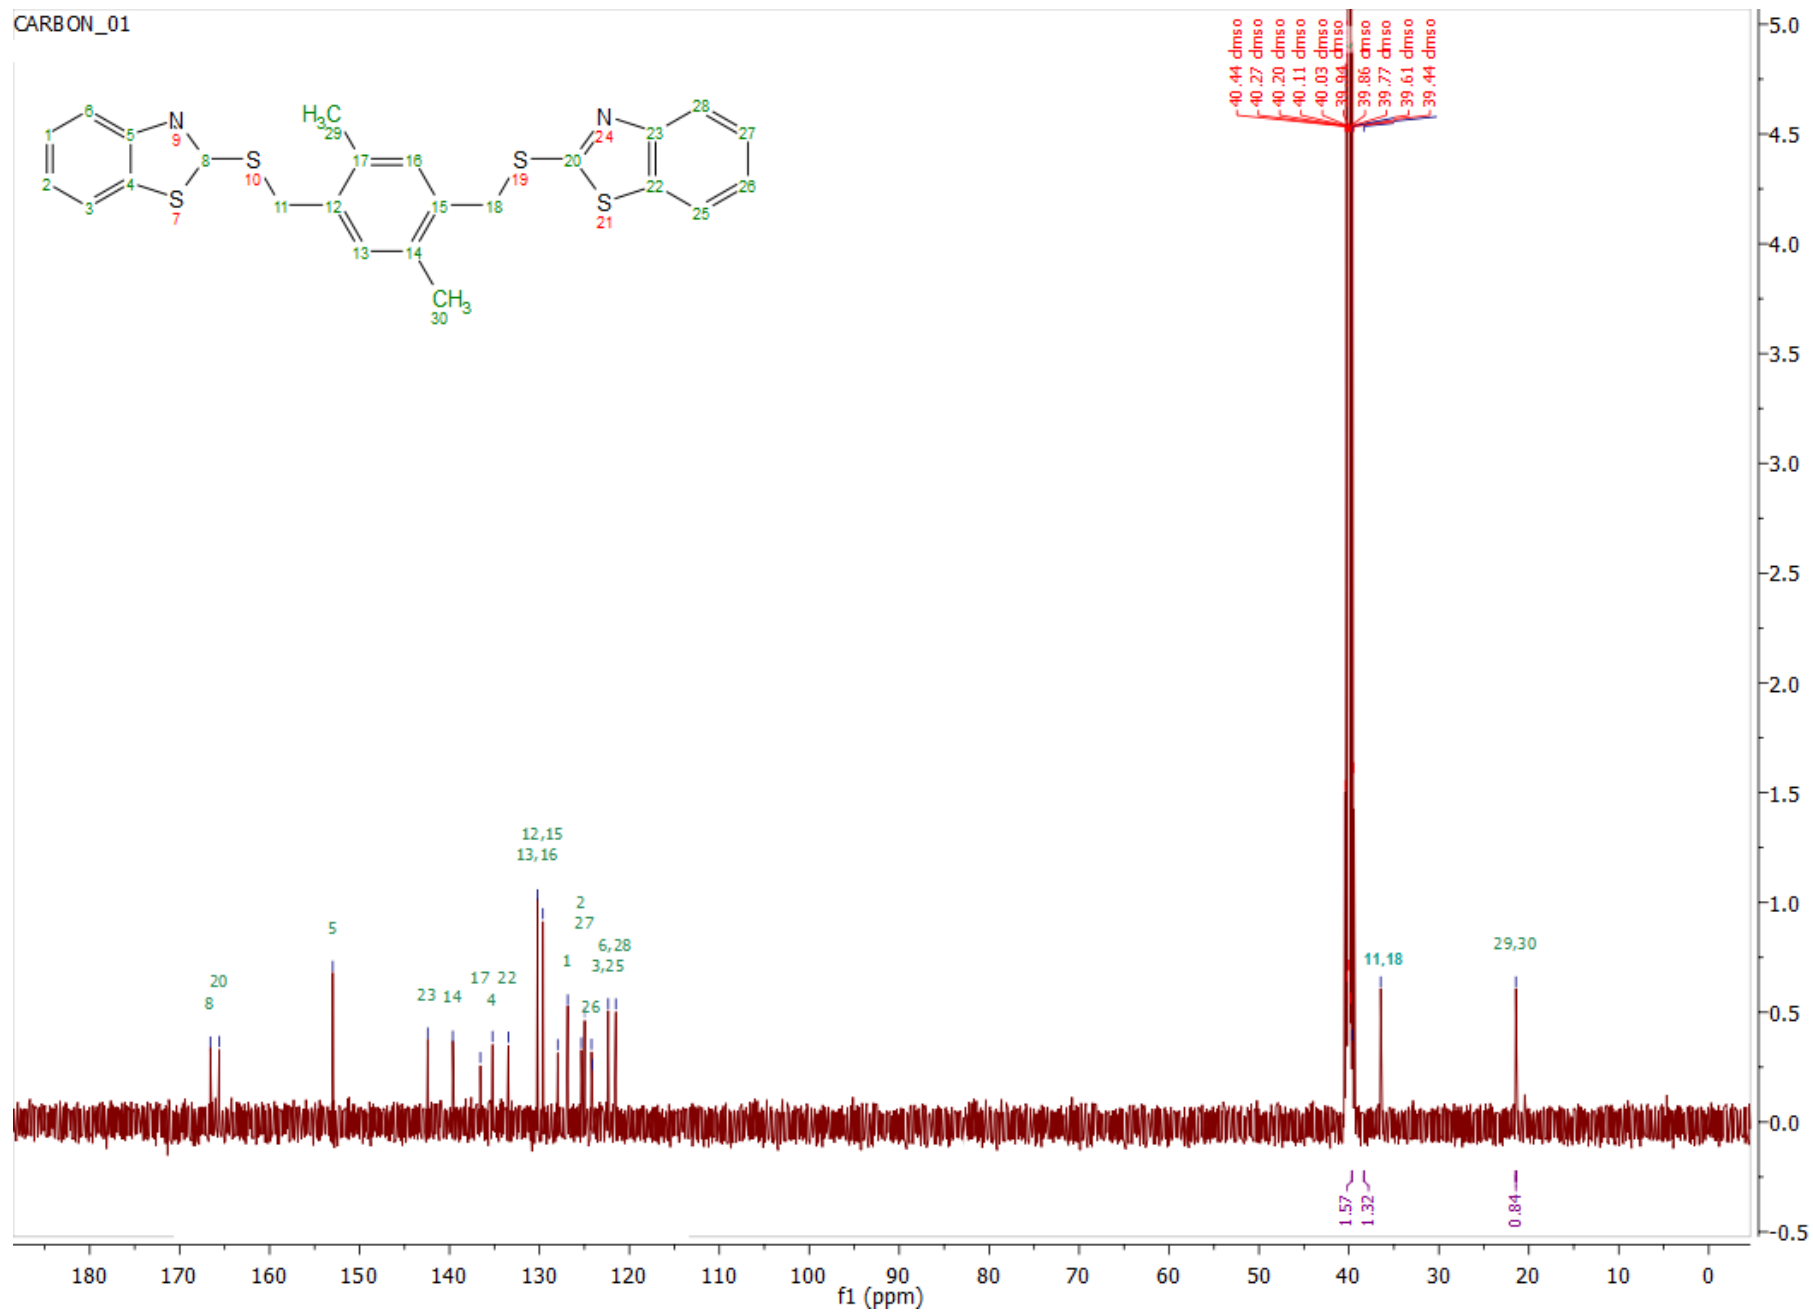



# Compound 3b

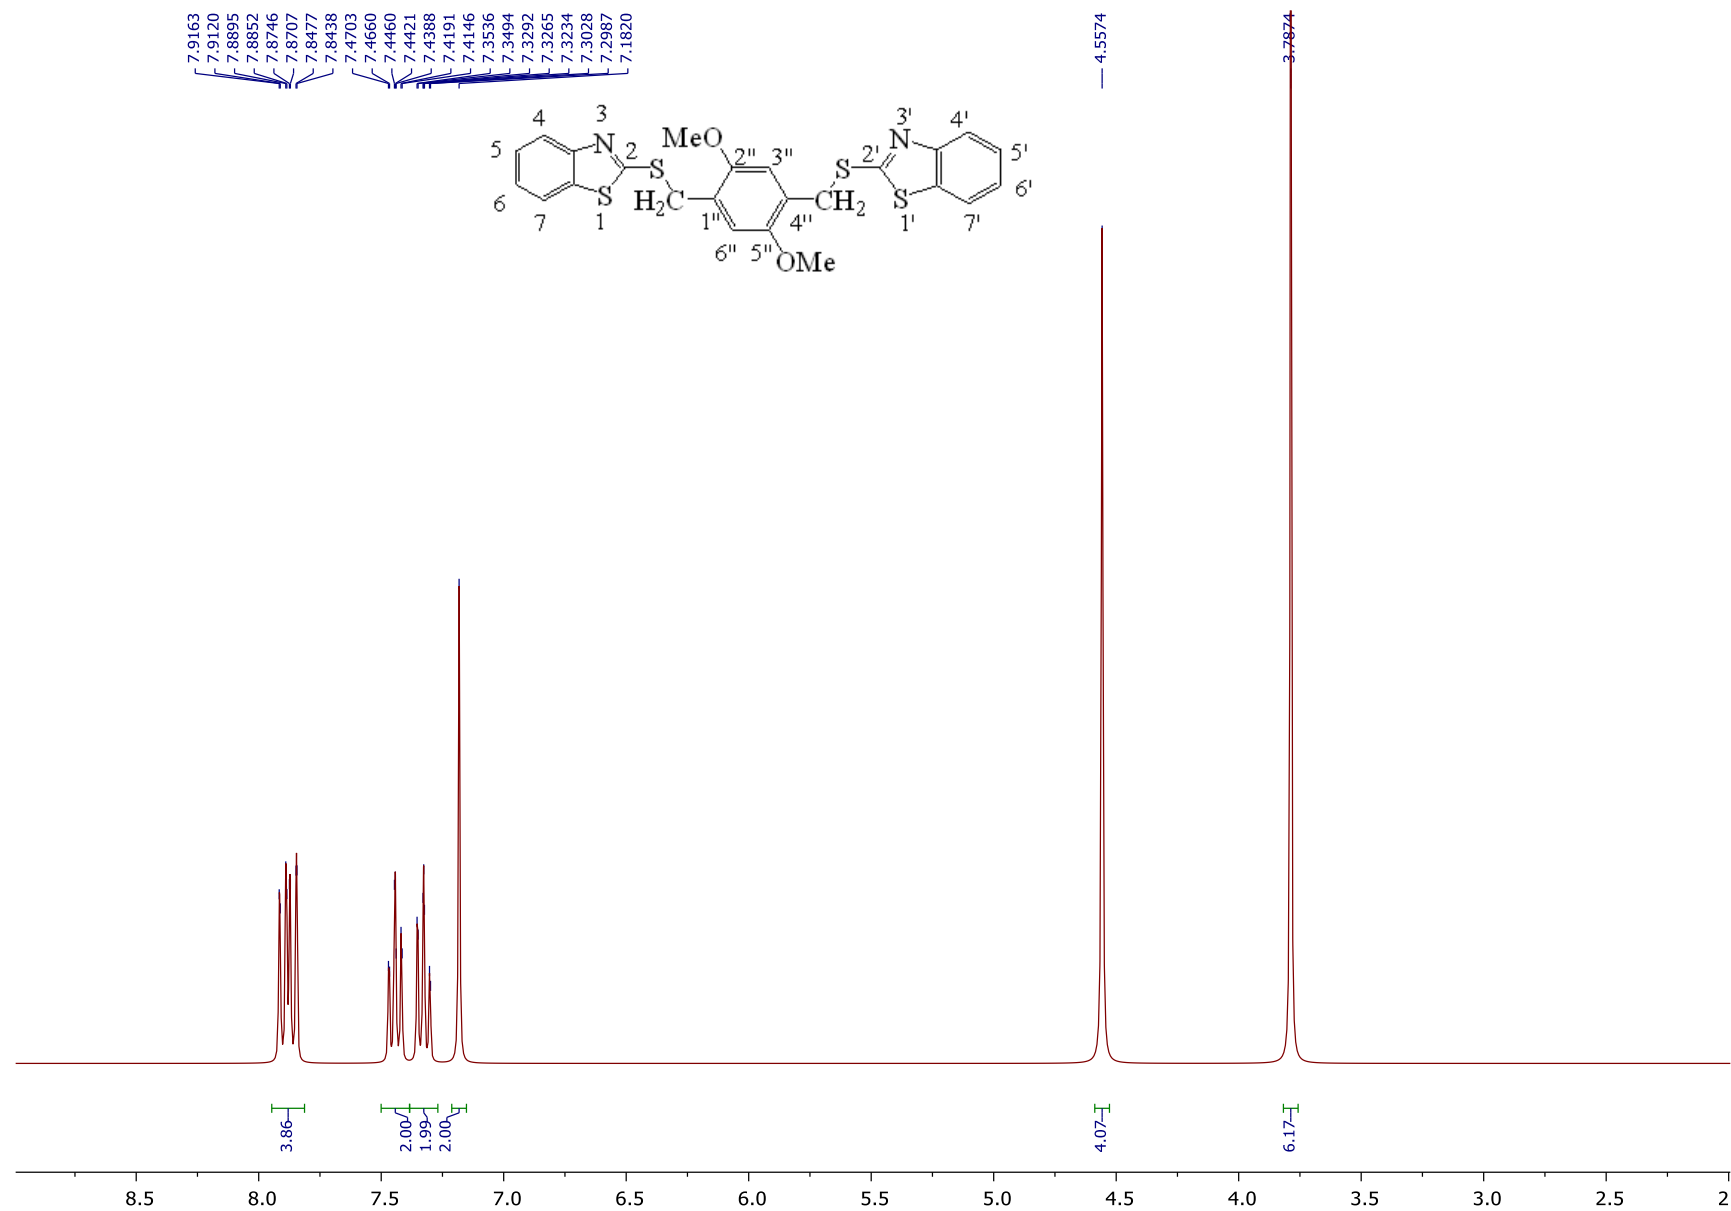

CARBON\_01

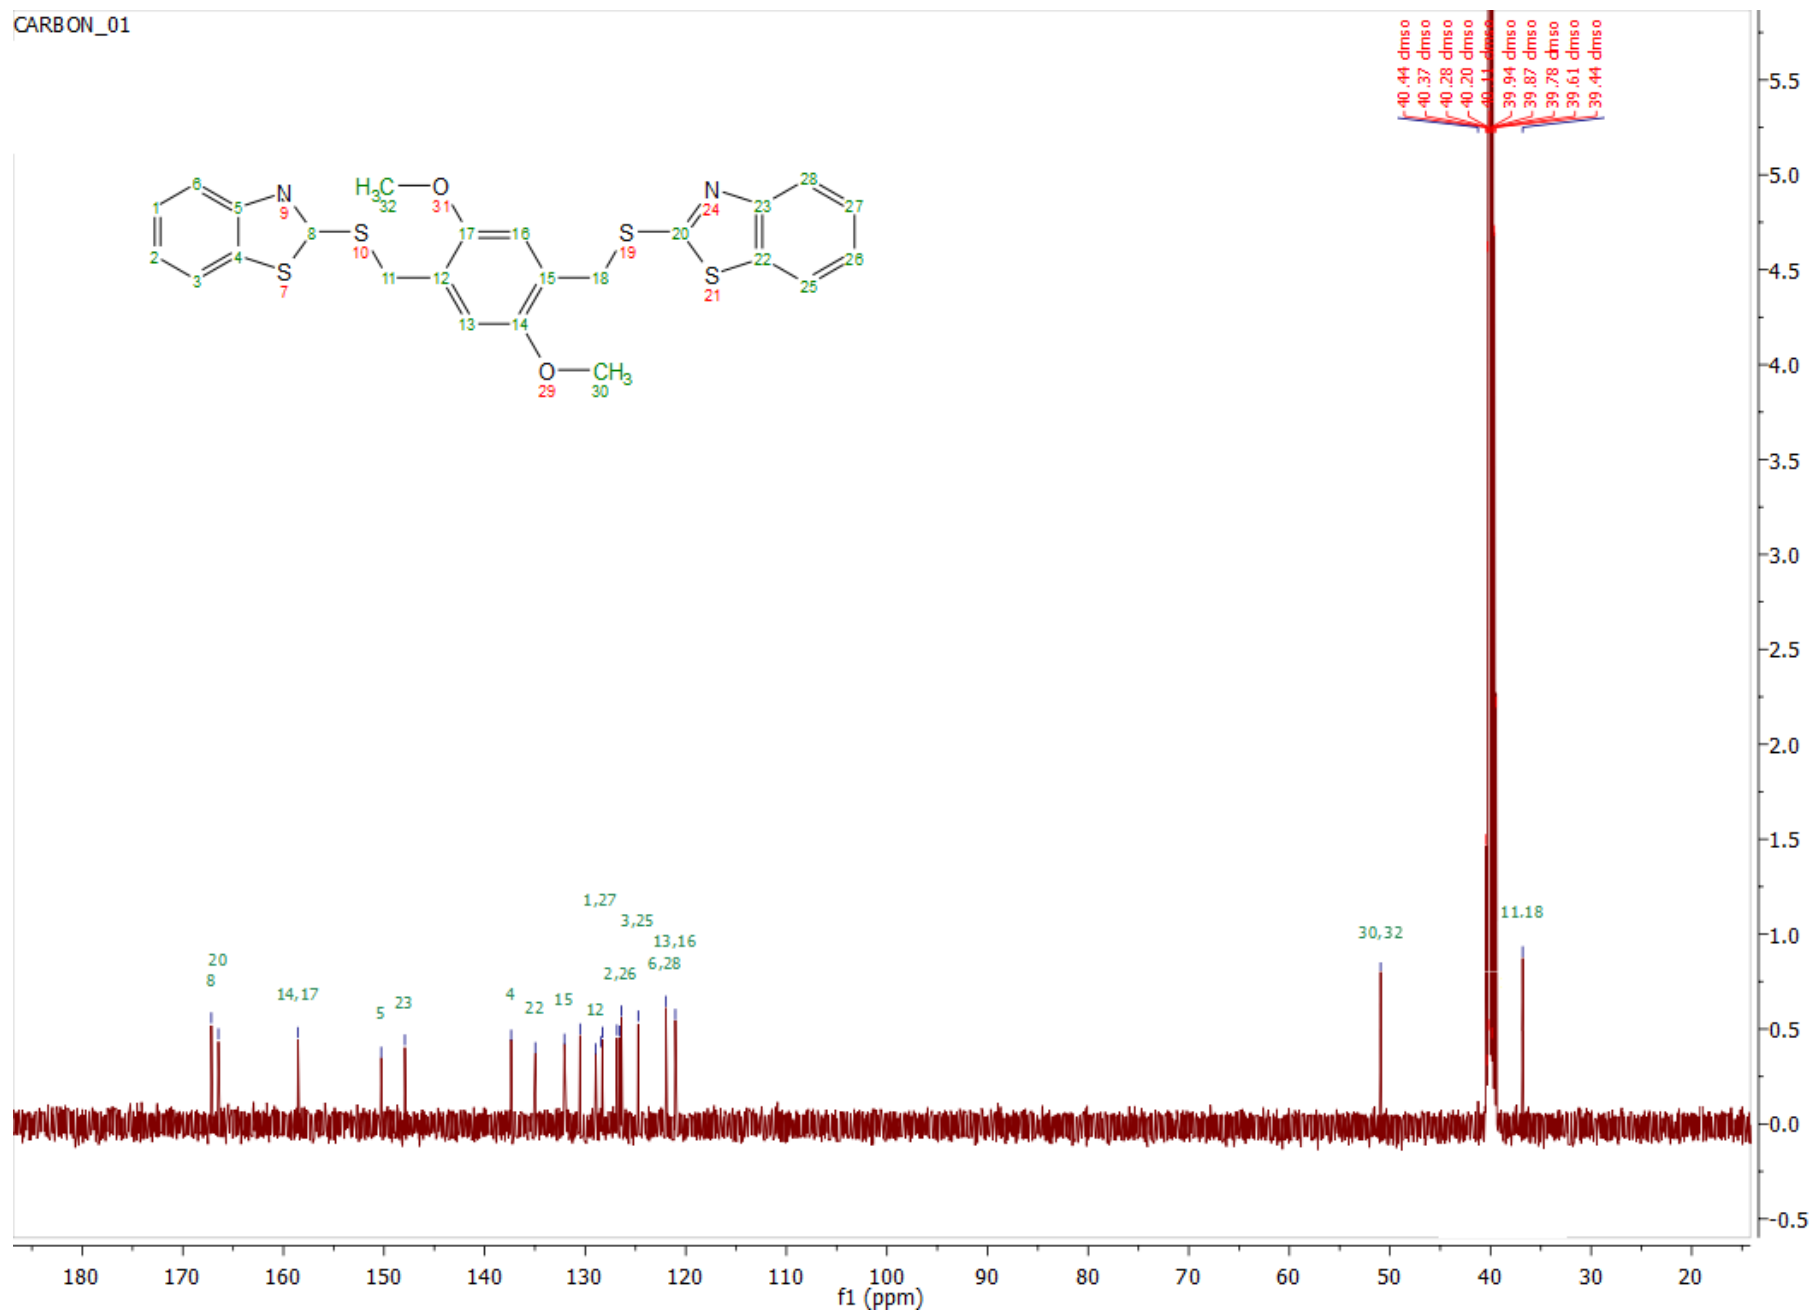

# Compound 5

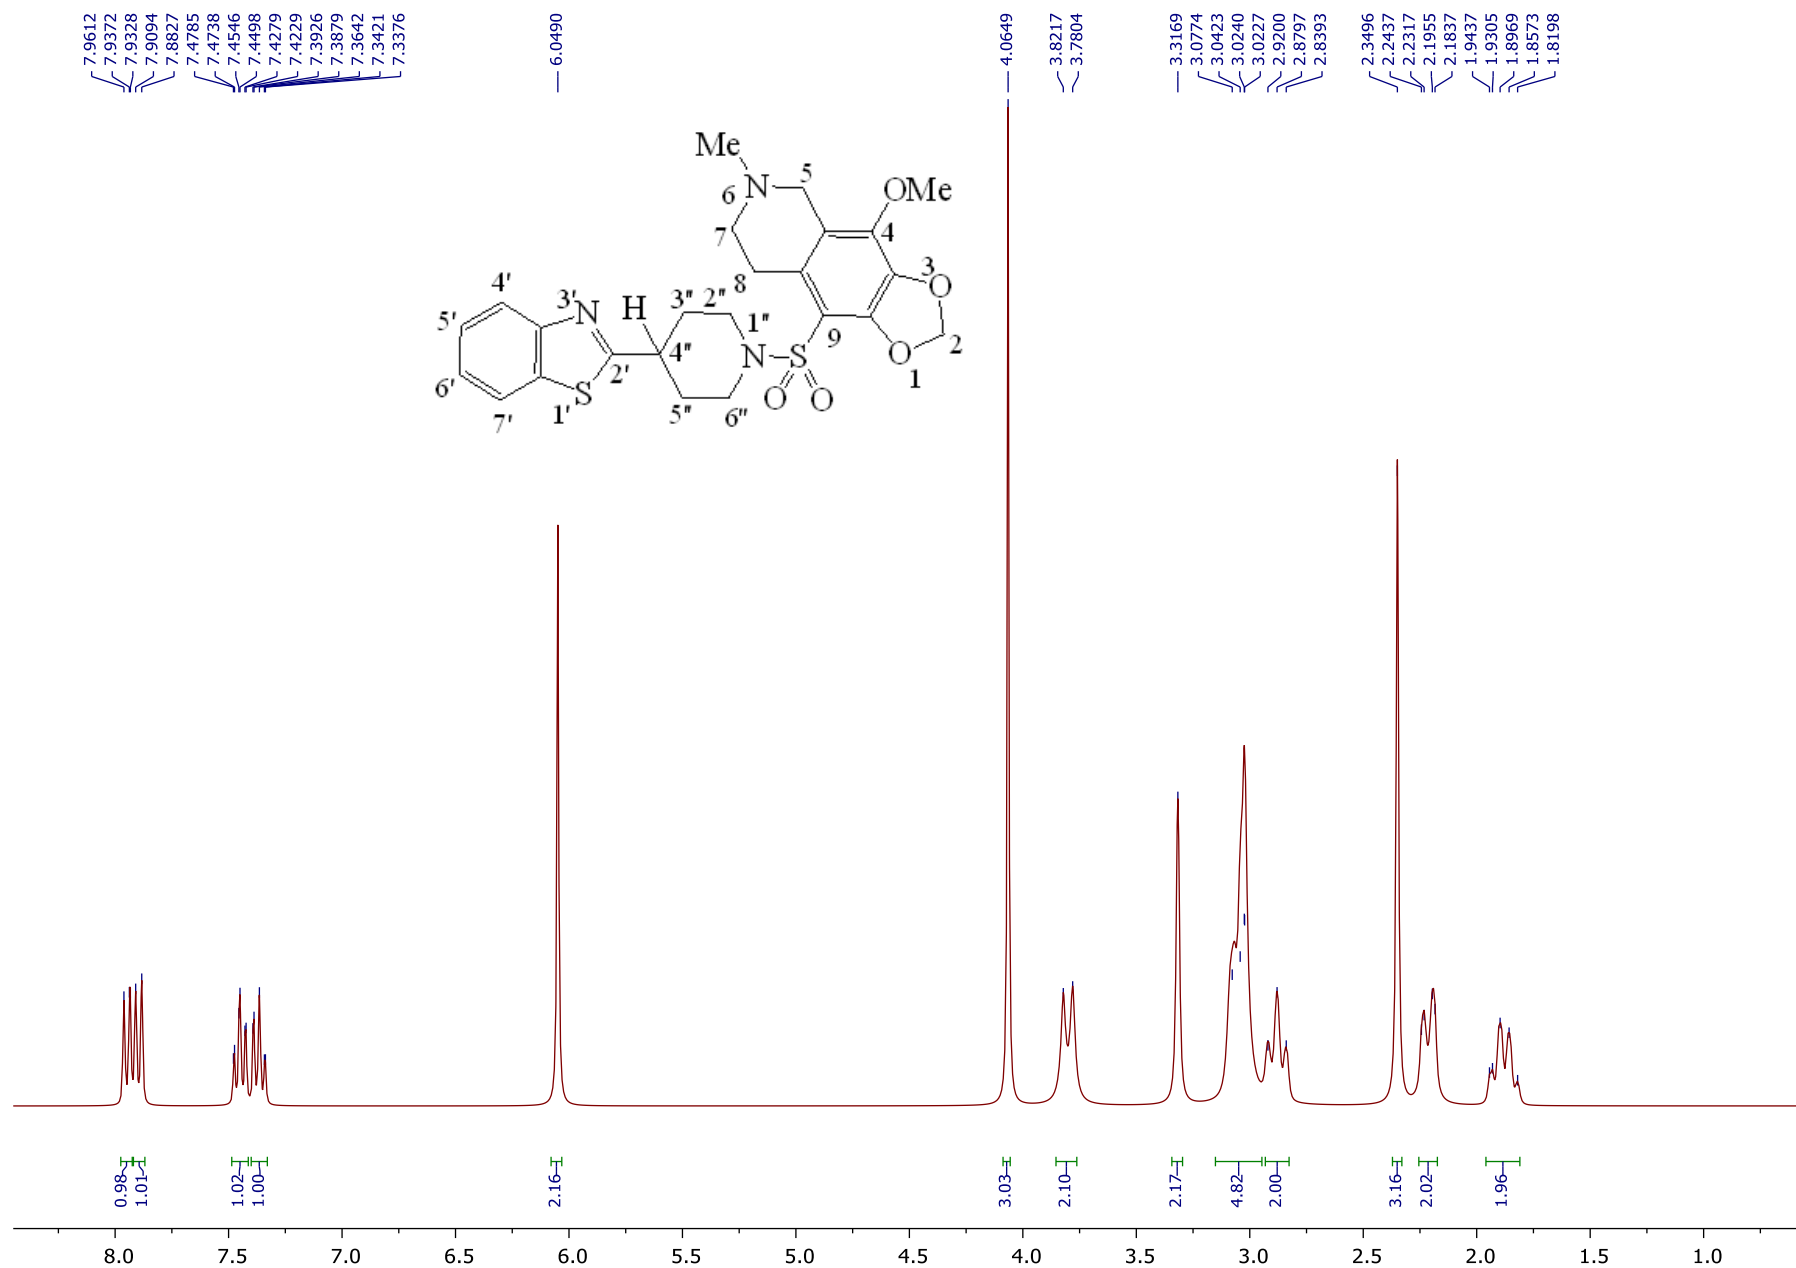

CARBON\_01  
IN-74714

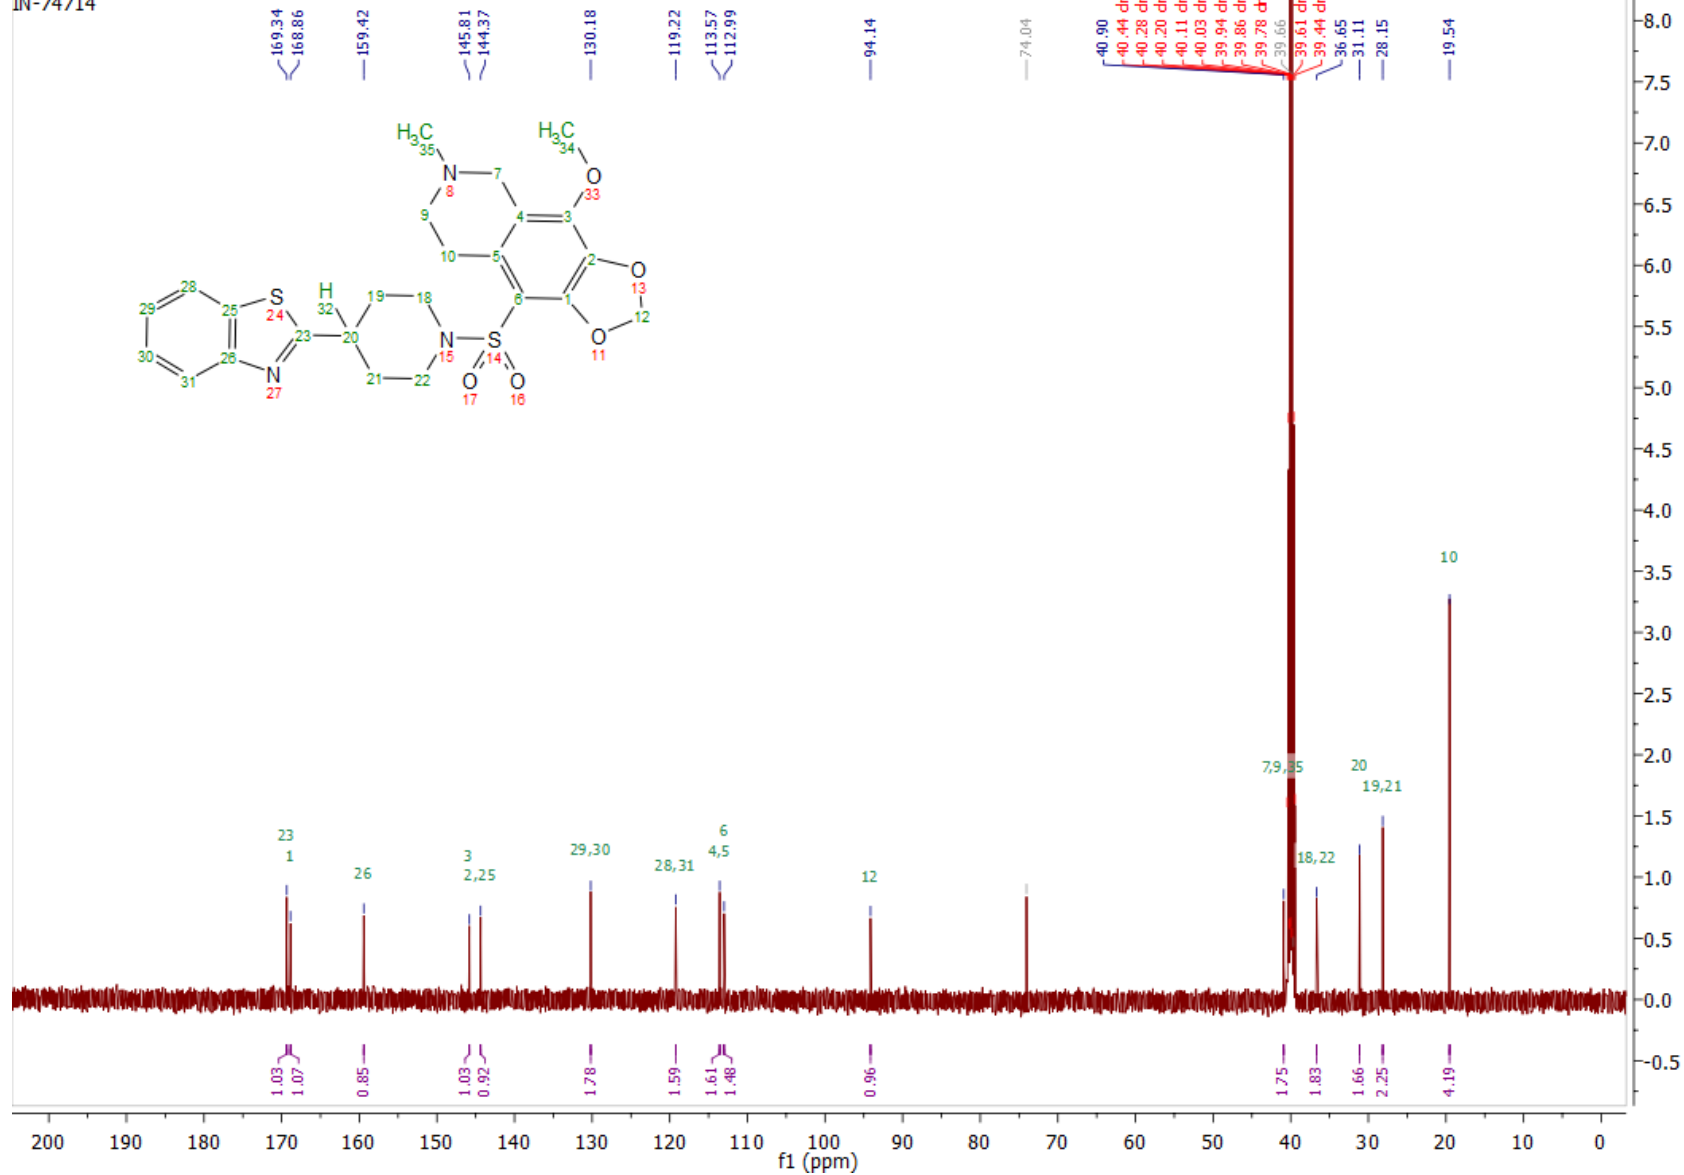

# Compound 6

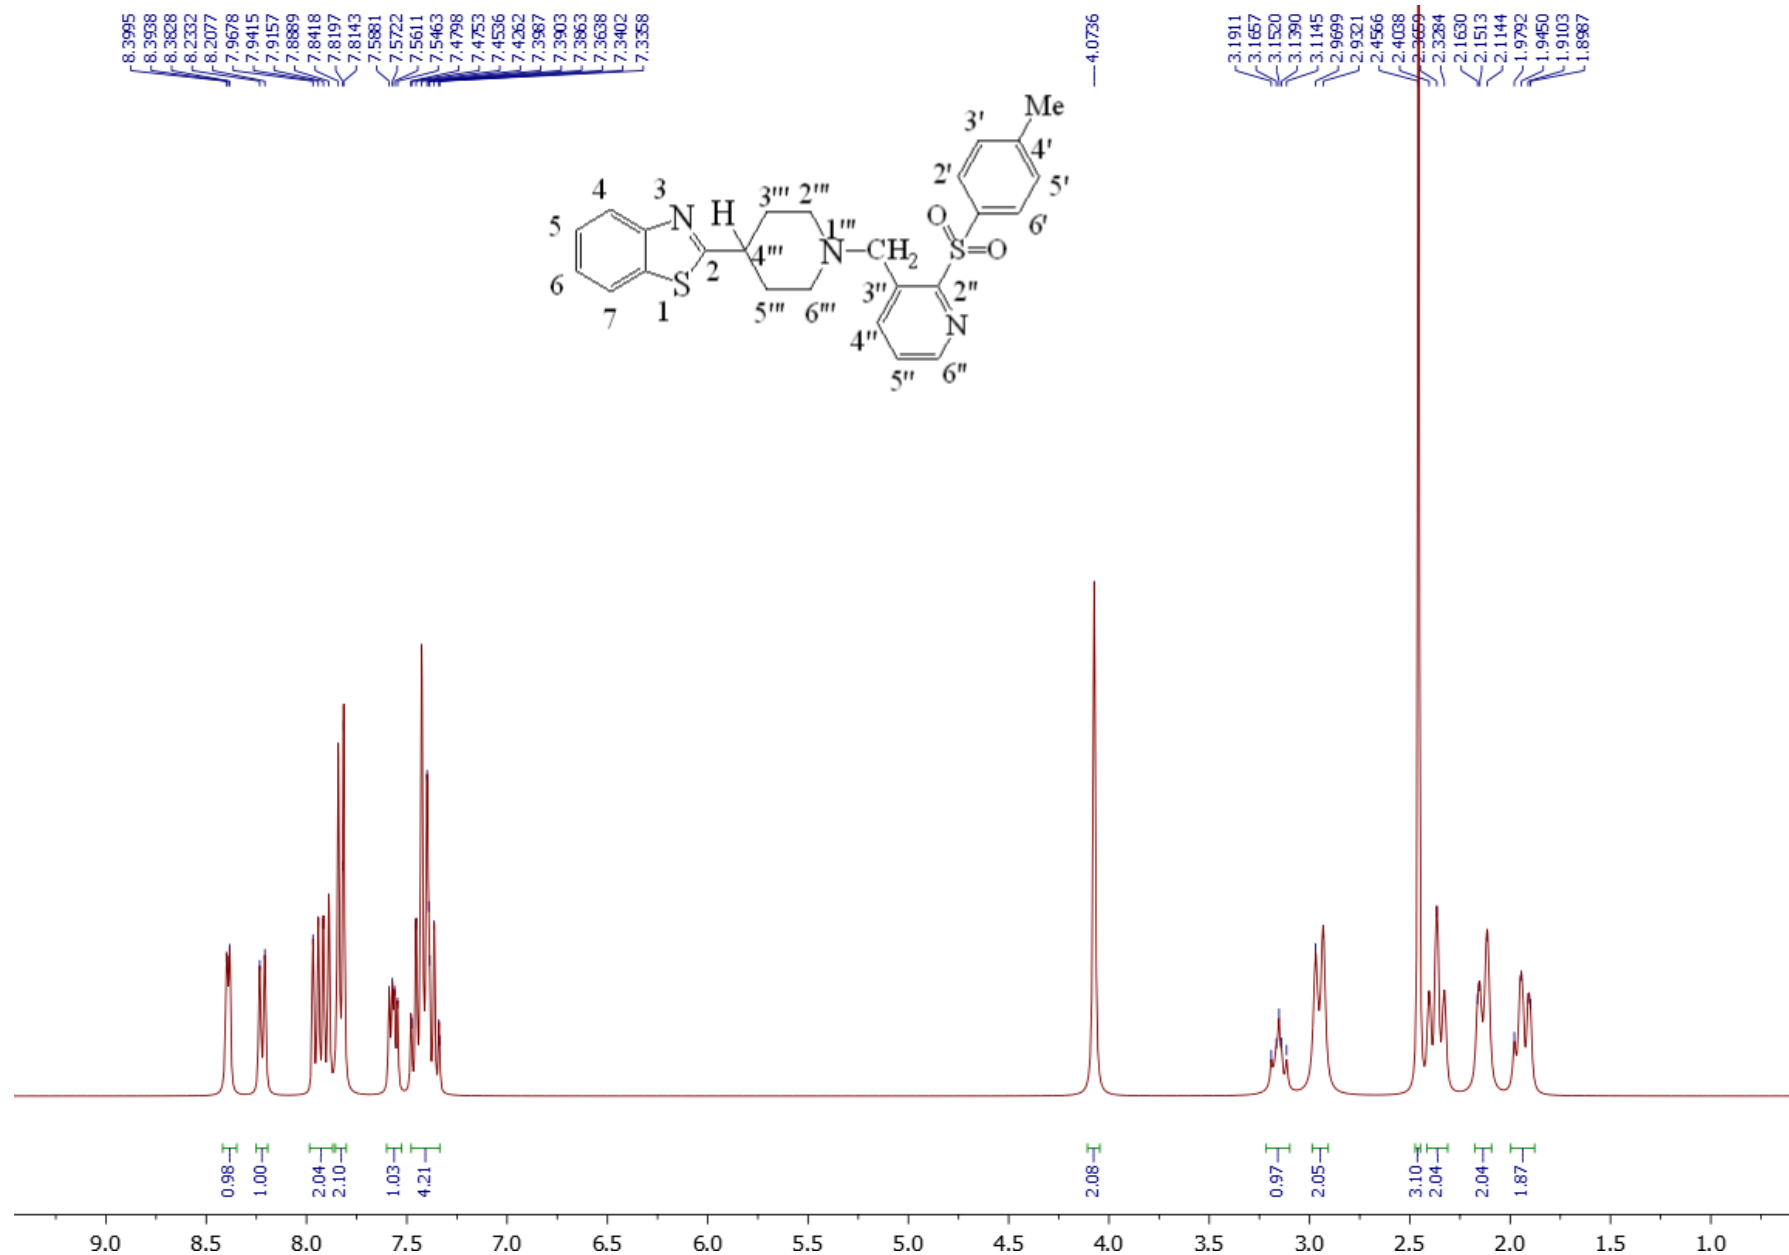

CARBON\_01  
7S-31379-20COMPOUNDS

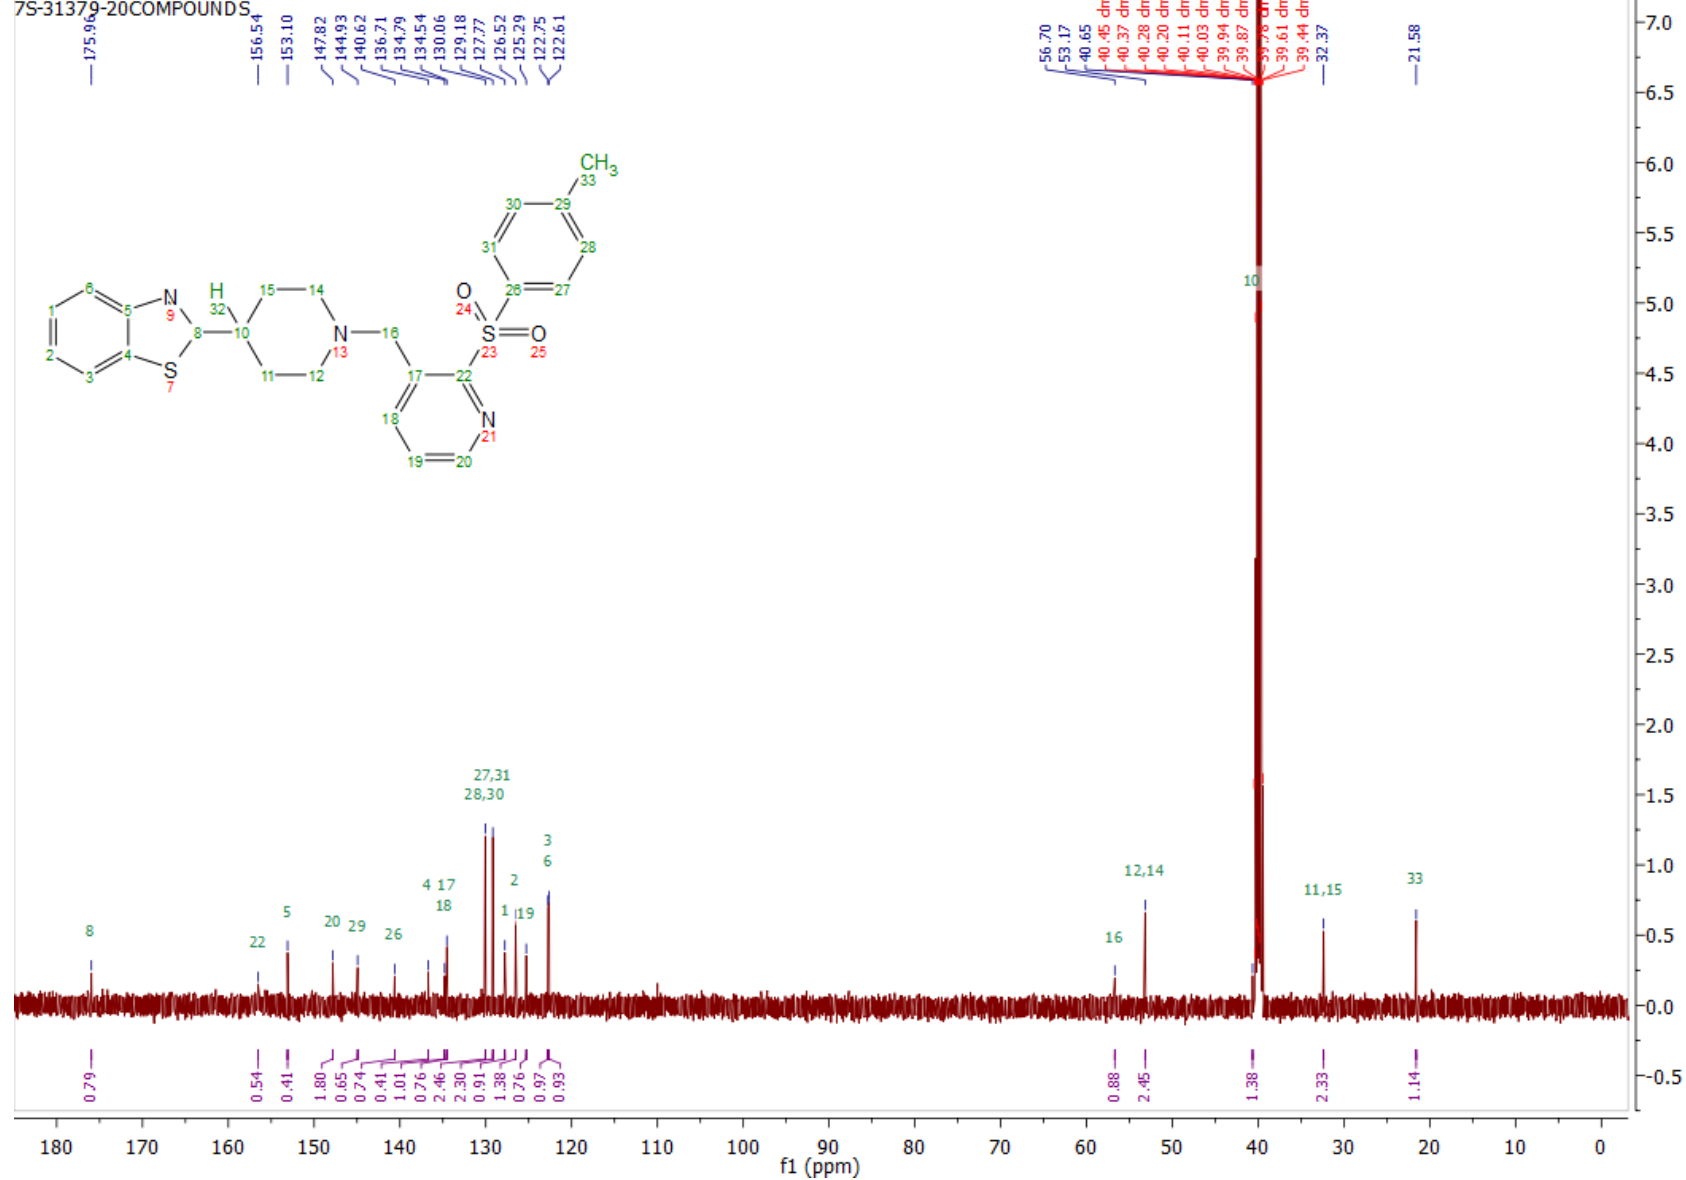

# Compound 8

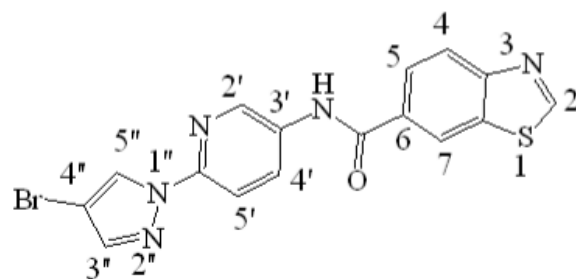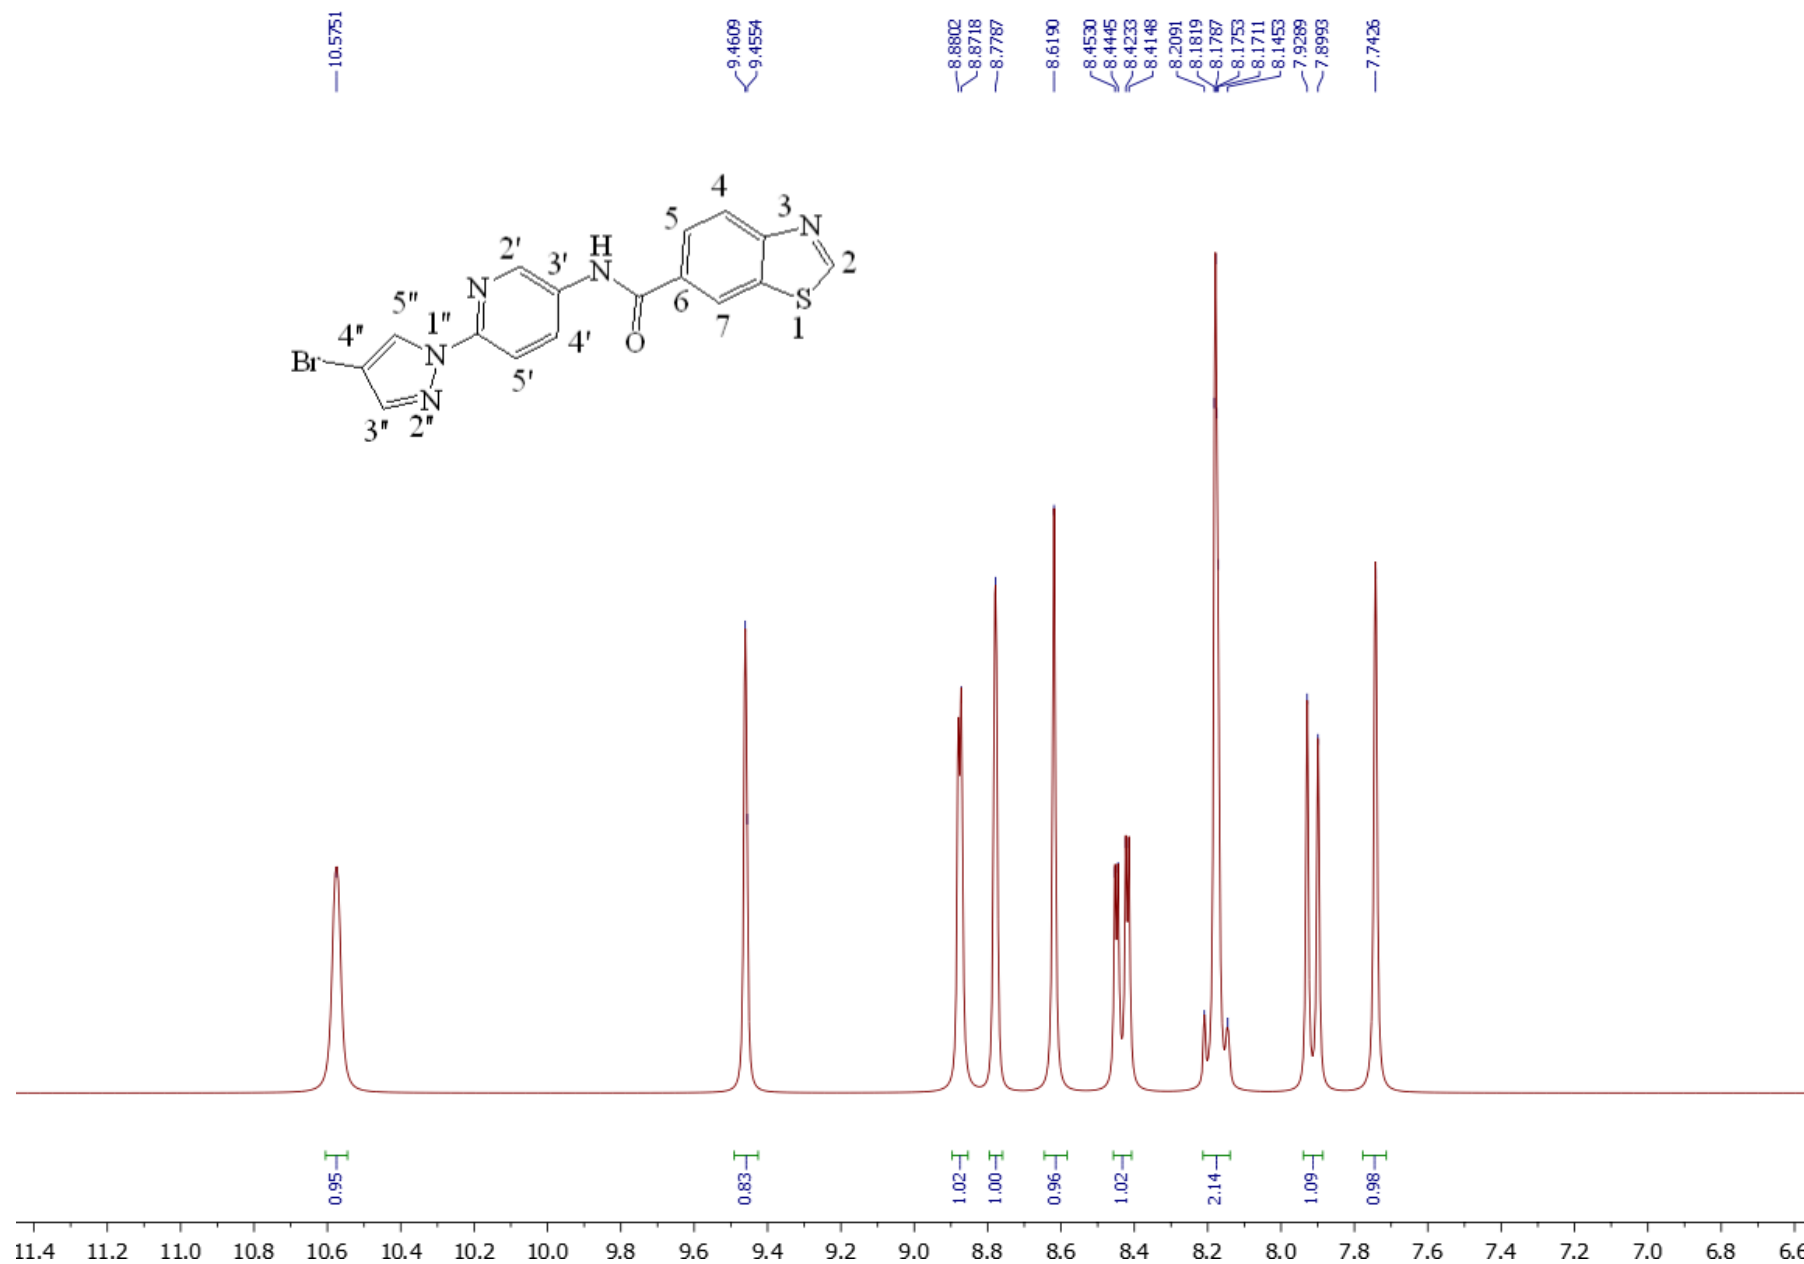

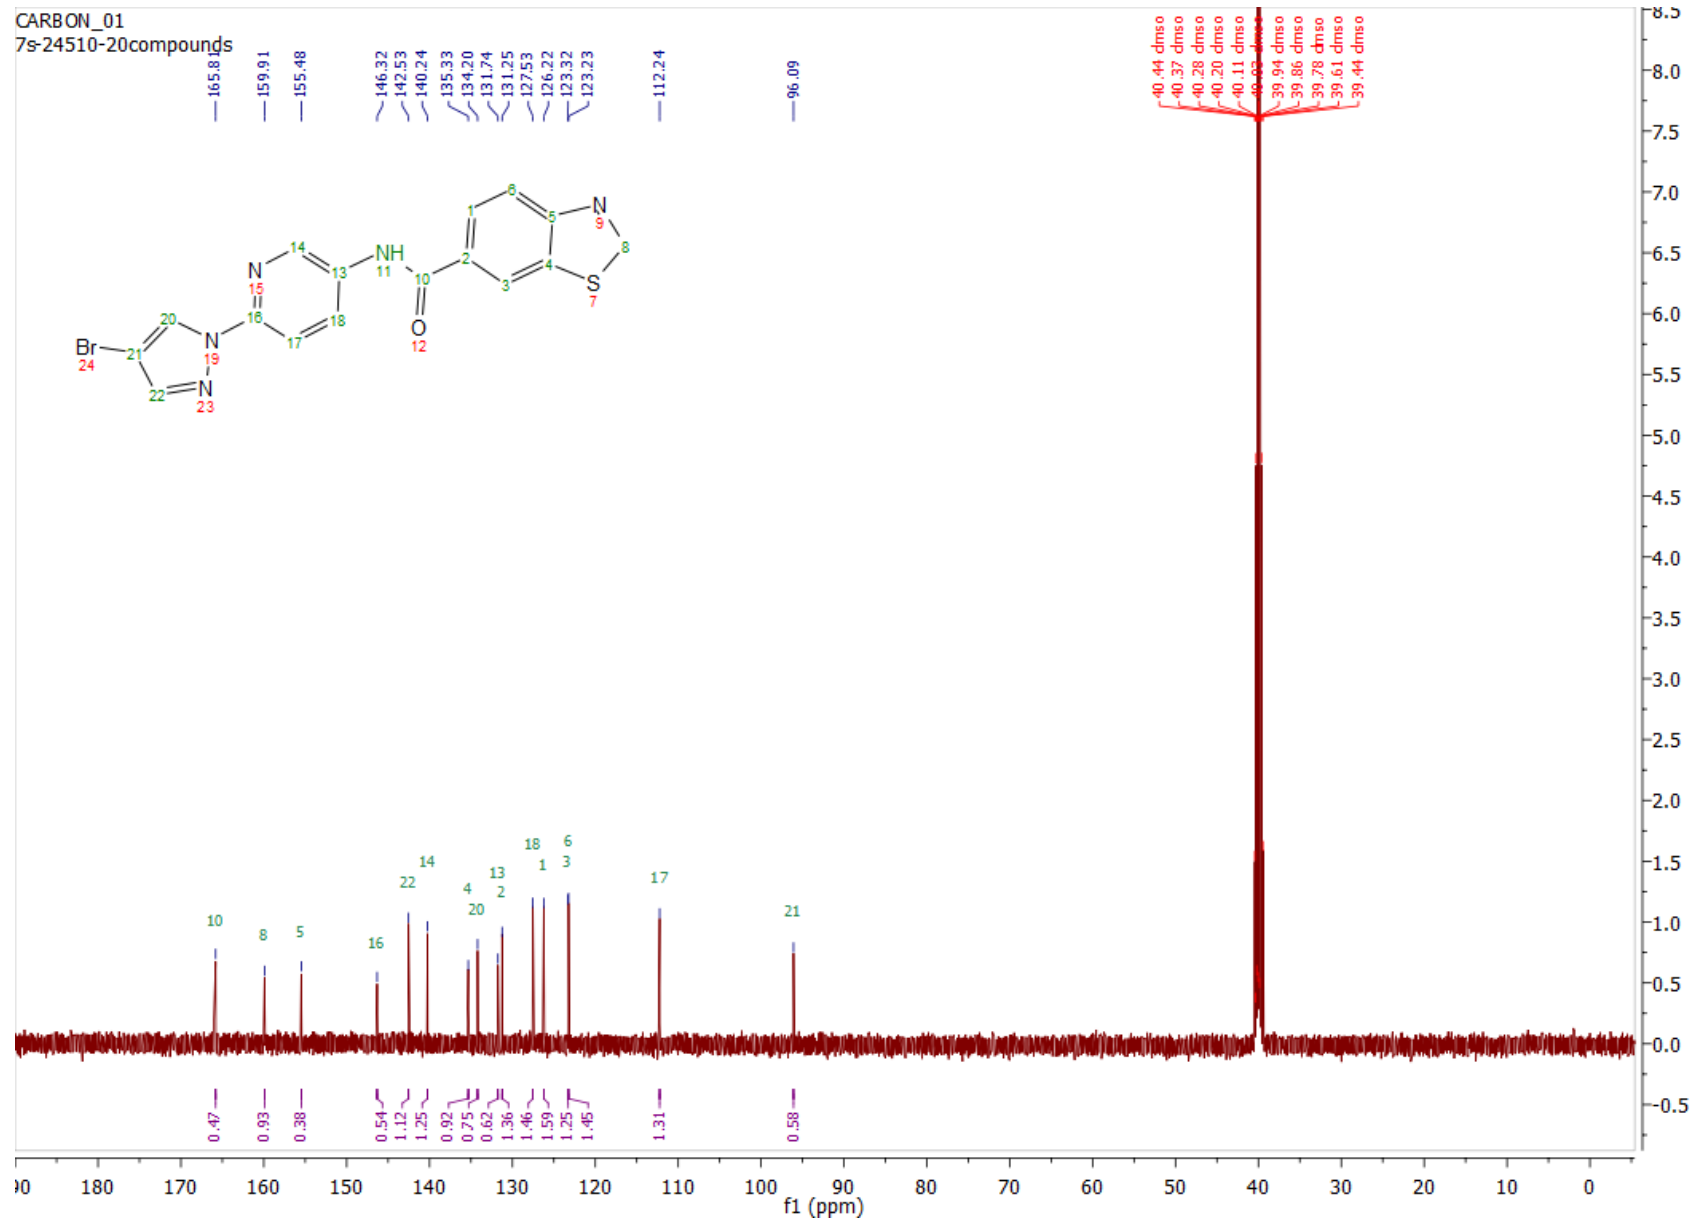



# Compound 10

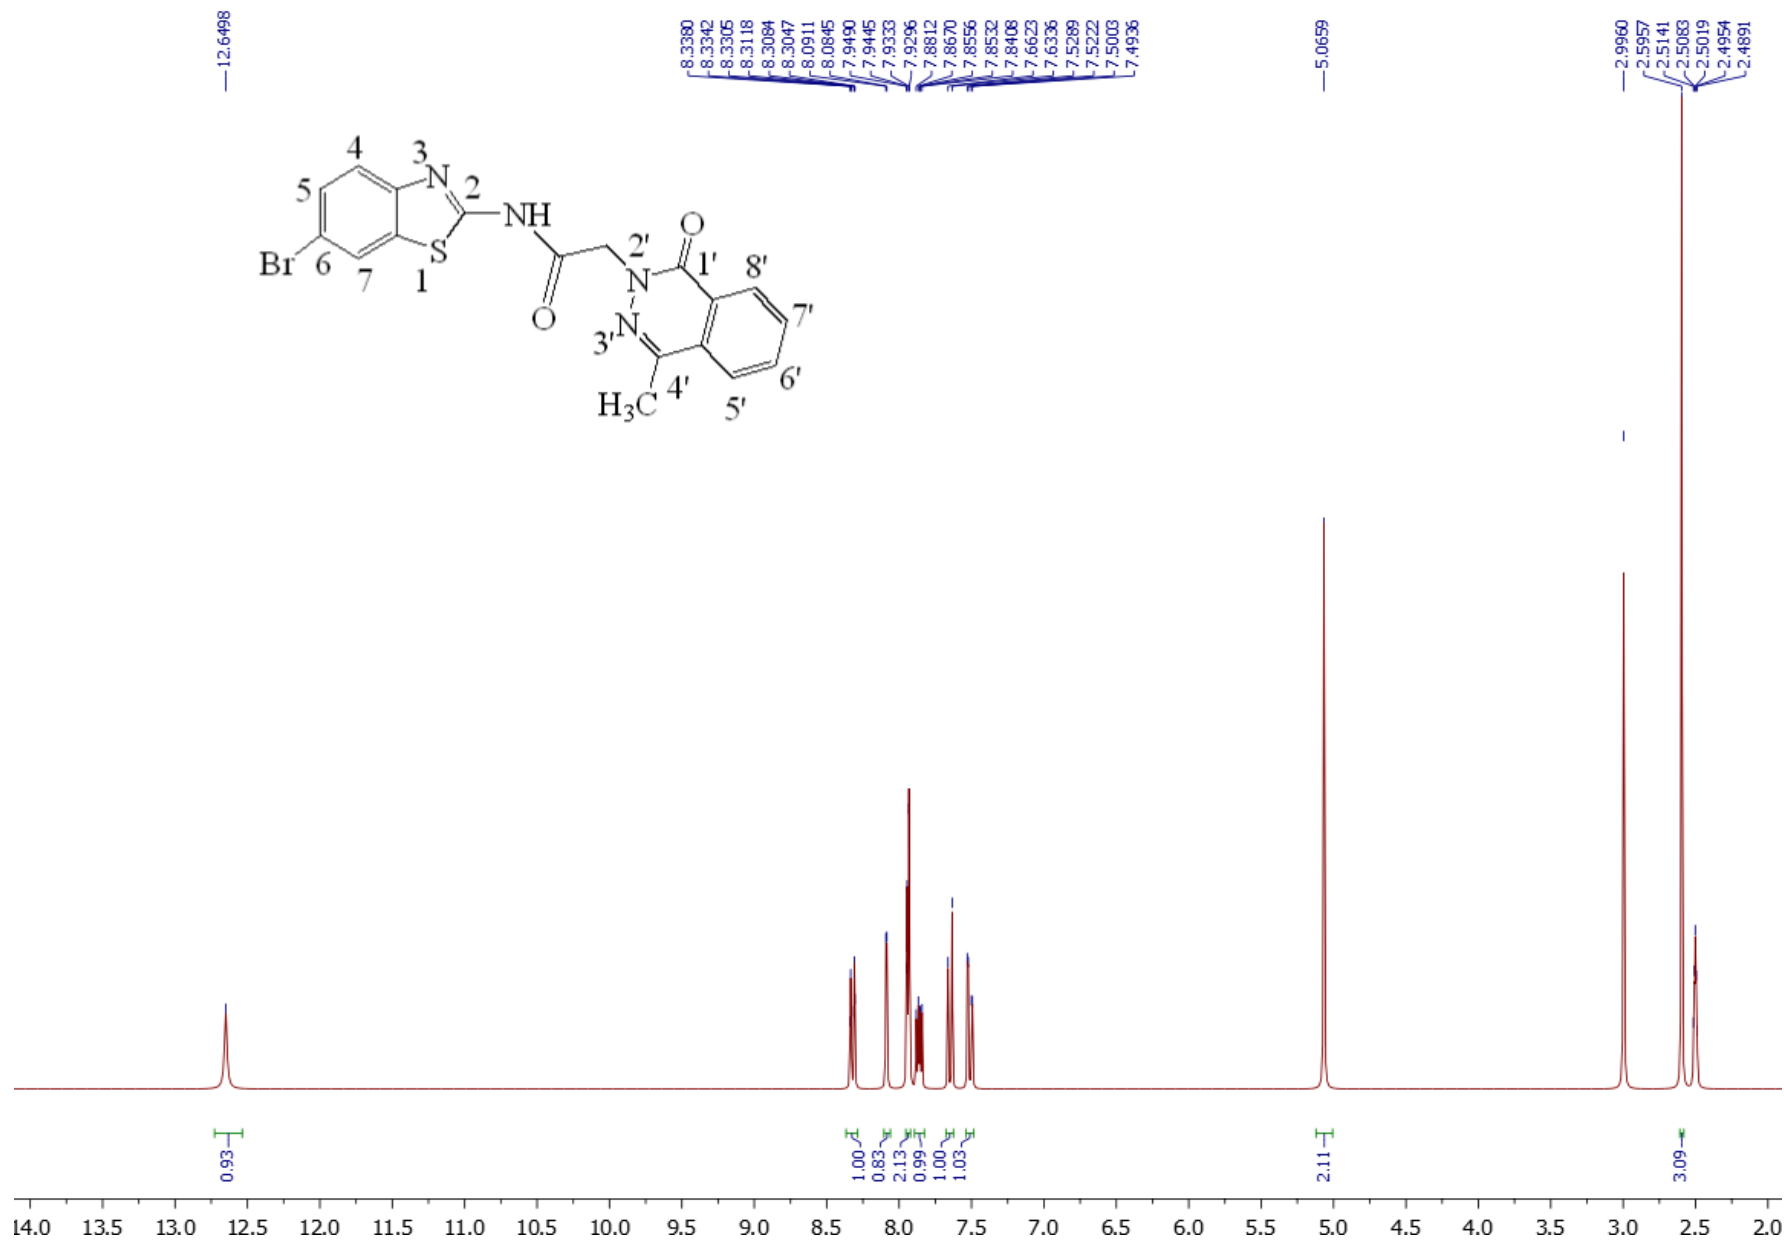

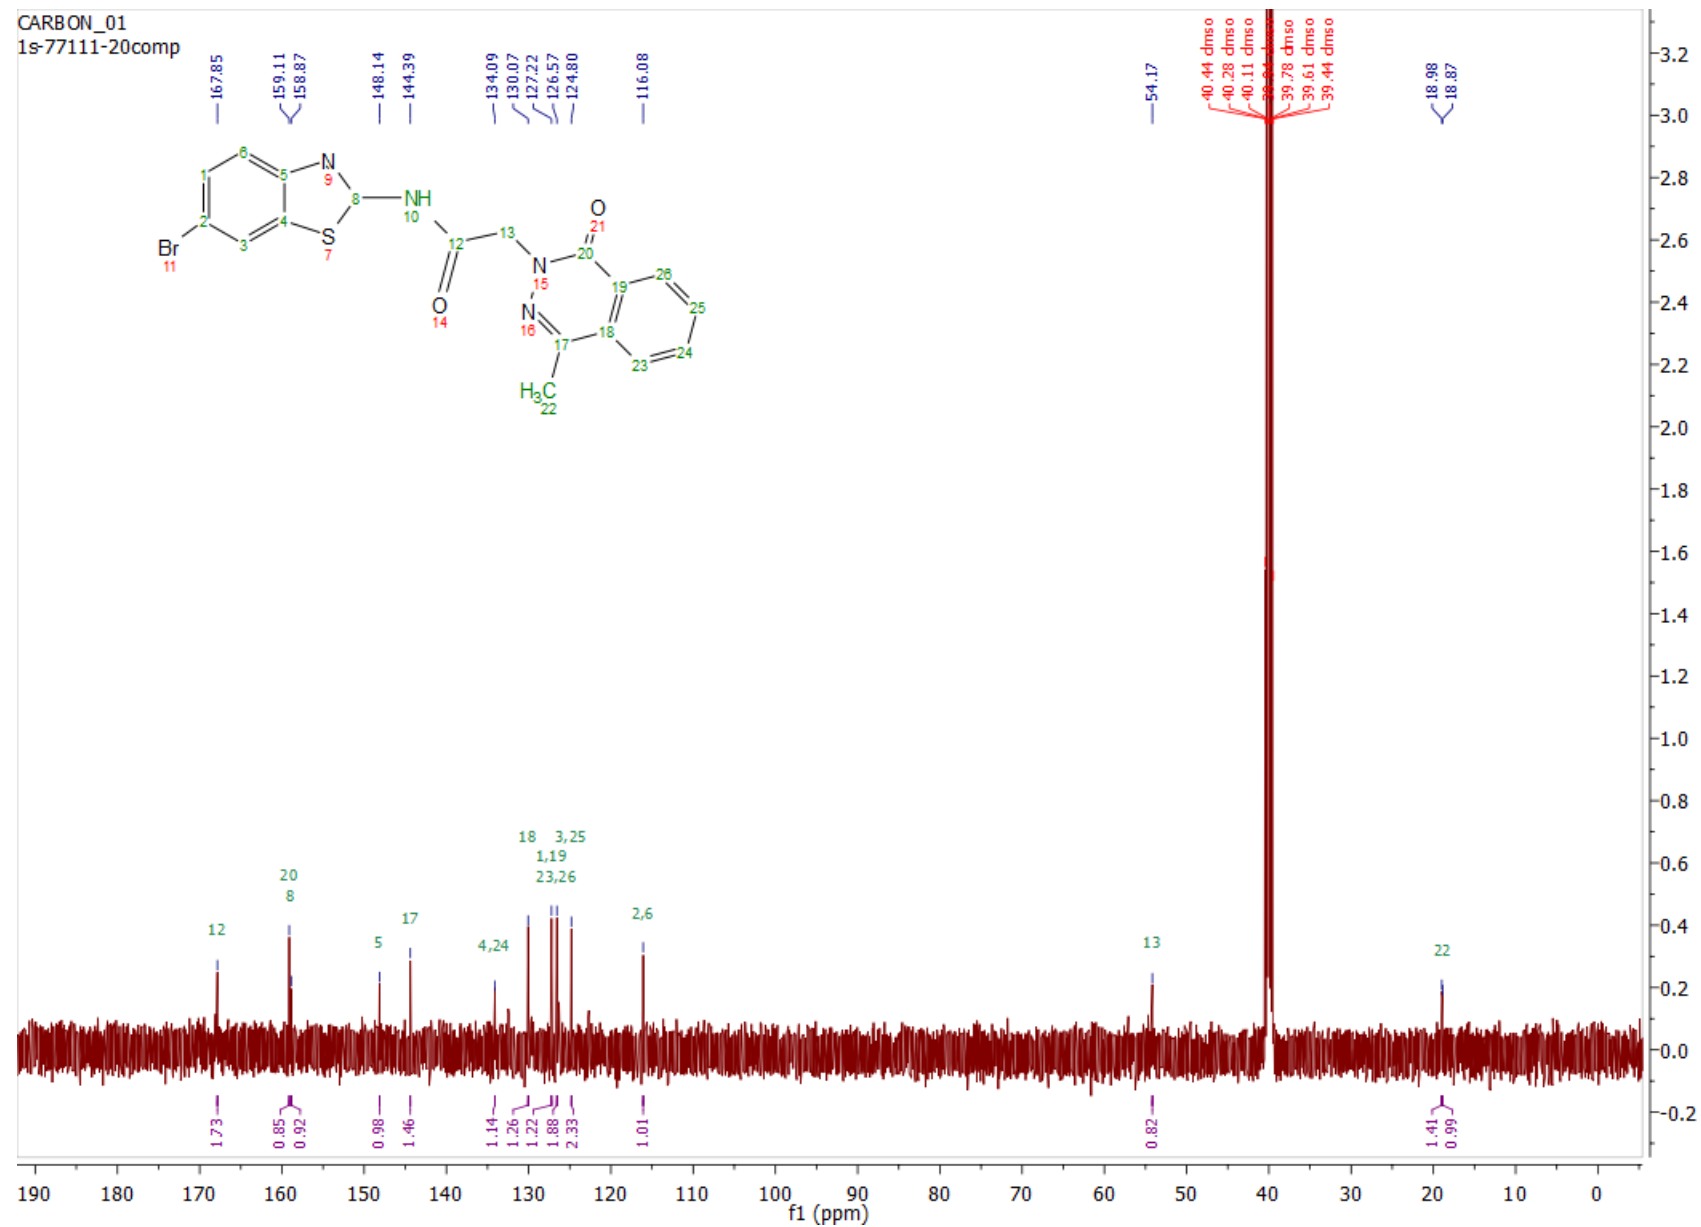

Supplement: s1 [file s1]
